# Supplementary material for: Convergent synthesis of isomeric heterosaccharides related to the fragments of galactomannan from Aspergillus fumigatus
Source: Royal Society of Chemistry journal article supplement (doi:10.1039/c4ob02634a), 2015-01-01

## Convergent synthesis of isomeric heterosaccharides related to the fragments of galactomannan from *Aspergillus fumigatus*

D.A. Argunov, V.B. Krylov, N.E. Nifantiev\*

### Supporting information

#### Table of contents

|                                                                                                                                                                                                                                                                           |    |
|---------------------------------------------------------------------------------------------------------------------------------------------------------------------------------------------------------------------------------------------------------------------------|----|
| NMR-monitoring of rearrangement of pyranoside <b>8</b> .....                                                                                                                                                                                                              | 3  |
| NMR and ESI-mass spectra of compounds.....                                                                                                                                                                                                                                | 4  |
| Allyl 3,6-di-O-benzyl- $\beta$ -D-galactopyranoside ( <b>8</b> ).....                                                                                                                                                                                                     | 4  |
| Disodium salt of allyl 3,6-di-O-benzyl-2,5-di-O-sulfo- $\beta$ -D-galactofuranoside ( <b>9</b> ).....                                                                                                                                                                     | 6  |
| Allyl 3,6-di-O-benzyl- $\beta$ -D-galactofuranoside ( <b>10</b> ).....                                                                                                                                                                                                    | 8  |
| Allyl 3,6-di-O-benzyl-2-O-chloroacetyl- $\beta$ -D-galactofuranoside ( <b>11</b> ).....                                                                                                                                                                                   | 10 |
| Allyl 3,6-di-O-benzyl-5-O-chloroacetyl- $\beta$ -D-galactofuranoside ( <b>12</b> ).....                                                                                                                                                                                   | 12 |
| Allyl 2-O-benzoyl-3,6-di-O-benzyl- $\beta$ -D-galactofuranoside ( <b>13</b> ) from diol <b>10</b> .....                                                                                                                                                                   | 14 |
| Allyl 2-O-benzoyl-3,6-di-O-benzyl-5-O-chloroacetyl- $\beta$ -D-galactofuranoside ( <b>15</b> ).....                                                                                                                                                                       | 15 |
| Allyl 2-O-benzoyl-3,6-di-O-benzyl- $\beta$ -D-galactofuranoside ( <b>13</b> ) (pure, from <b>15</b> ).....                                                                                                                                                                | 17 |
| 2-O-benzoyl-3,6-di-O-benzyl-5-O-chloroacetyl-D-galactofuranose ( <b>16</b> ).....                                                                                                                                                                                         | 19 |
| 2-O-benzoyl-3,6-di-O-benzyl-5-O-chloroacetyl- $\beta$ -D-galactofuranoside trichloroacetimidate ( <b>17</b> ).....                                                                                                                                                        | 21 |
| Allyl 2-O-benzoyl-3,6-di-O-benzyl-5-O-chloroacetyl- $\beta$ -D-galactofuranosyl-(1 $\rightarrow$ 5)-2-O-benzoyl-3,6-di-O-benzyl- $\beta$ -D-galactofuranoside ( <b>18</b> ).....                                                                                          | 23 |
| Allyl 2-O-benzoyl-3,6-di-O-benzyl-5-O-chloroacetyl- $\beta$ -D-galactofuranosyl-(1 $\rightarrow$ 5)-3,6-di-O-benzyl- $\beta$ -D-galactofuranoside ( <b>19</b> ).....                                                                                                      | 25 |
| 2-O-benzoyl-3,6-di-O-benzyl-5-O-chloroacetyl- $\beta$ -D-galactofuranosyl-(1 $\rightarrow$ 5)-2-O-benzoyl-3,6-di-O-benzyl- $\beta$ -D-galactofuranoside trichloroacetimidate ( <b>5</b> ).....                                                                            | 27 |
| Allyl 2,3,5,6-tetra-O-benzoyl- $\beta$ -D-galactofuranosyl-(1 $\rightarrow$ 5)-3,6-di-O-benzyl- $\beta$ -D-galactofuranoside ( <b>21</b> ).....                                                                                                                           | 29 |
| Allyl 2,3,5,6-tetra-O-benzoyl- $\beta$ -D-galactofuranosyl-(1 $\rightarrow$ 5)-2-O-benzoyl-3,6-di-O-benzyl- $\beta$ -D-galactofuranoside ( <b>22</b> ).....                                                                                                               | 31 |
| 2,3,5,6-tetra-O-benzoyl- $\beta$ -D-galactofuranosyl-(1 $\rightarrow$ 5)-2-O-benzoyl-3,6-di-O-benzyl- $\beta$ -D-galactofuranoside trichloroacetimidate ( <b>6</b> ).....                                                                                                 | 33 |
| 3-trifluoroacetamidopropyl 2,3,4-tri-O-benzoyl- $\alpha$ -D-mannopyranoside ( <b>3</b> ).....                                                                                                                                                                             | 35 |
| 3-trifluoroacetamidopropyl 2-O-benzoyl-4,5-di-O-benzyl- $\alpha$ -D-mannopyranoside ( <b>4</b> ).....                                                                                                                                                                     | 37 |
| 3-trifluoroacetamidopropyl 2-O-benzoyl-3,6-di-O-benzyl-5-O-chloroacetyl- $\beta$ -D-galactofuranosyl-(1 $\rightarrow$ 5)-2-O-benzoyl-3,6-di-O-benzyl- $\beta$ -D-galactofuranosyl-(1 $\rightarrow$ 6)-2,3,4-tri-O-benzoyl- $\alpha$ -D-mannopyranoside ( <b>25</b> )..... | 39 |
| 3-trifluoroacetamidopropyl 2-O-benzoyl-3,6-di-O-benzyl- $\beta$ -D-galactofuranosyl-(1 $\rightarrow$ 5)-2-O-benzoyl-3,6-di-O-benzyl- $\beta$ -D-galactofuranosyl-(1 $\rightarrow$ 6)-2,3,4-tri-O-benzoyl- $\alpha$ -D-mannopyranoside ( <b>26</b> ).....                  | 41 |

|                                                                                                                                                                                                                                                                                                                                                                                                                                     |    |
|-------------------------------------------------------------------------------------------------------------------------------------------------------------------------------------------------------------------------------------------------------------------------------------------------------------------------------------------------------------------------------------------------------------------------------------|----|
| 3-trifluoroacetamidopropyl 2-O-benzoyl-3,6-di-O-benzyl-5-O-chloroacetyl- $\beta$ -D-galactofuranosyl-(1 $\rightarrow$ 5)-2-O-benzoyl-3,6-di-O-benzyl- $\beta$ -D-galactofuranosyl-(1 $\rightarrow$ 5)-2-O-benzoyl-3,6-di-O-benzyl- $\beta$ -D-galactofuranosyl-(1 $\rightarrow$ 5)-2-O-benzoyl-3,6-di-O-benzyl- $\beta$ -D-galactofuranosyl-(1 $\rightarrow$ 6)-2,3,4-tri-O-benzoyl- $\alpha$ -D-mannopyranoside ( <b>27</b> )..... | 43 |
| 3-aminopropyl $\beta$ -D-galactofuranosyl-(1 $\rightarrow$ 5)- $\beta$ -D-galactofuranosyl-(1 $\rightarrow$ 5)- $\beta$ -D-galactofuranosyl-(1 $\rightarrow$ 5)- $\beta$ -D-galactofuranosyl-(1 $\rightarrow$ 6)- $\alpha$ -D-mannopyranoside ( <b>1</b> ) .....                                                                                                                                                                    | 45 |
| 3-trifluoroacetamidopropyl 2-O-benzoyl-3,6-di-O-benzyl-5-O-chloroacetyl- $\beta$ -D-galactofuranosyl-(1 $\rightarrow$ 5)-2-O-benzoyl-3,6-di-O-benzyl- $\beta$ -D-galactofuranosyl-(1 $\rightarrow$ 3)-2-O-benzoyl-4,6-di-O-benzyl- $\alpha$ -D-mannopyranoside ( <b>28</b> ) .....                                                                                                                                                  | 47 |
| 3-trifluoroacetamidopropyl 2-O-benzoyl-3,6-di-O-benzyl- $\beta$ -D-galactofuranosyl-(1 $\rightarrow$ 5)-2-O-benzoyl-3,6-di-O-benzyl- $\beta$ -D-galactofuranosyl-(1 $\rightarrow$ 3)-2-O-benzoyl-4,6-di-O-benzyl- $\alpha$ -D-mannopyranoside ( <b>29</b> ) .....                                                                                                                                                                   | 49 |
| 3-trifluoroacetamidopropyl 2,3,5,6-tetra-O-benzoyl- $\beta$ -D-galactofuranosyl-(1 $\rightarrow$ 5)-2-O-benzoyl-3,6-di-O-benzyl- $\beta$ -D-galactofuranosyl-(1 $\rightarrow$ 5)-2-O-benzoyl-3,6-di-O-benzyl- $\beta$ -D-galactofuranosyl-(1 $\rightarrow$ 5)-2-O-benzoyl-3,6-di-O-benzyl- $\beta$ -D-galactofuranosyl-(1 $\rightarrow$ 3)-2-O-benzoyl-4,6-di-O-benzyl- $\alpha$ -D-mannopyranoside ( <b>30</b> ) .....             | 51 |
| 3-aminopropyl $\beta$ -D-galactofuranosyl-(1 $\rightarrow$ 5)- $\beta$ -D-galactofuranosyl-(1 $\rightarrow$ 5)- $\beta$ -D-galactofuranosyl-(1 $\rightarrow$ 5)- $\beta$ -D-galactofuranosyl-(1 $\rightarrow$ 3)- $\alpha$ -D-mannopyranoside ( <b>2</b> ) .....                                                                                                                                                                    | 53 |

# NMR-monitoring of rearrangement of pyranoside **8**\*

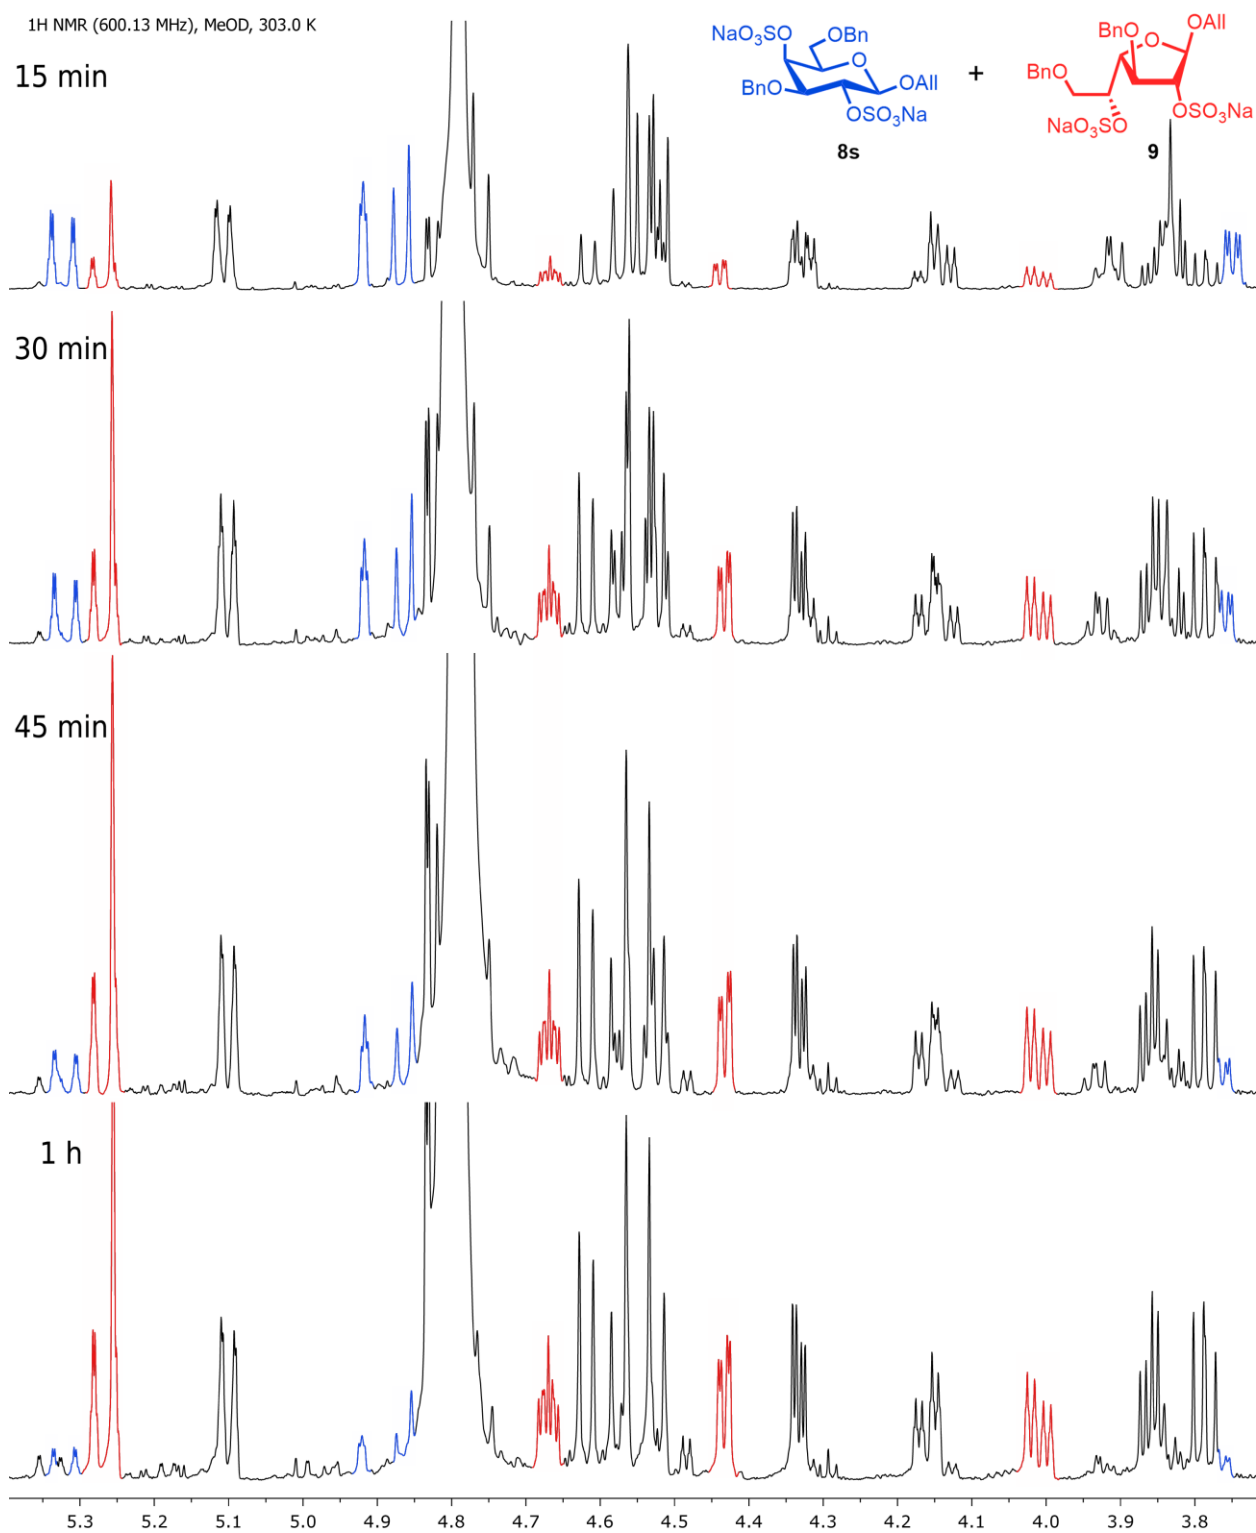

\* Conditions: **8** (1 eq.), Py·SO<sub>3</sub> (8 eq.), HSO<sub>3</sub>Cl (3.2 eq.), DMF (0.8 mL/1 mmol Py·SO<sub>3</sub>), 40 °C. Probes were treated by excess of aq. NaHCO<sub>3</sub>, concentrated *in vacuo* and extracted from solid by MeOH.

# NMR and ESI-mass spectra of compounds

## Allyl 3,6-di-O-benzyl-β-D-galactopyranoside (8)

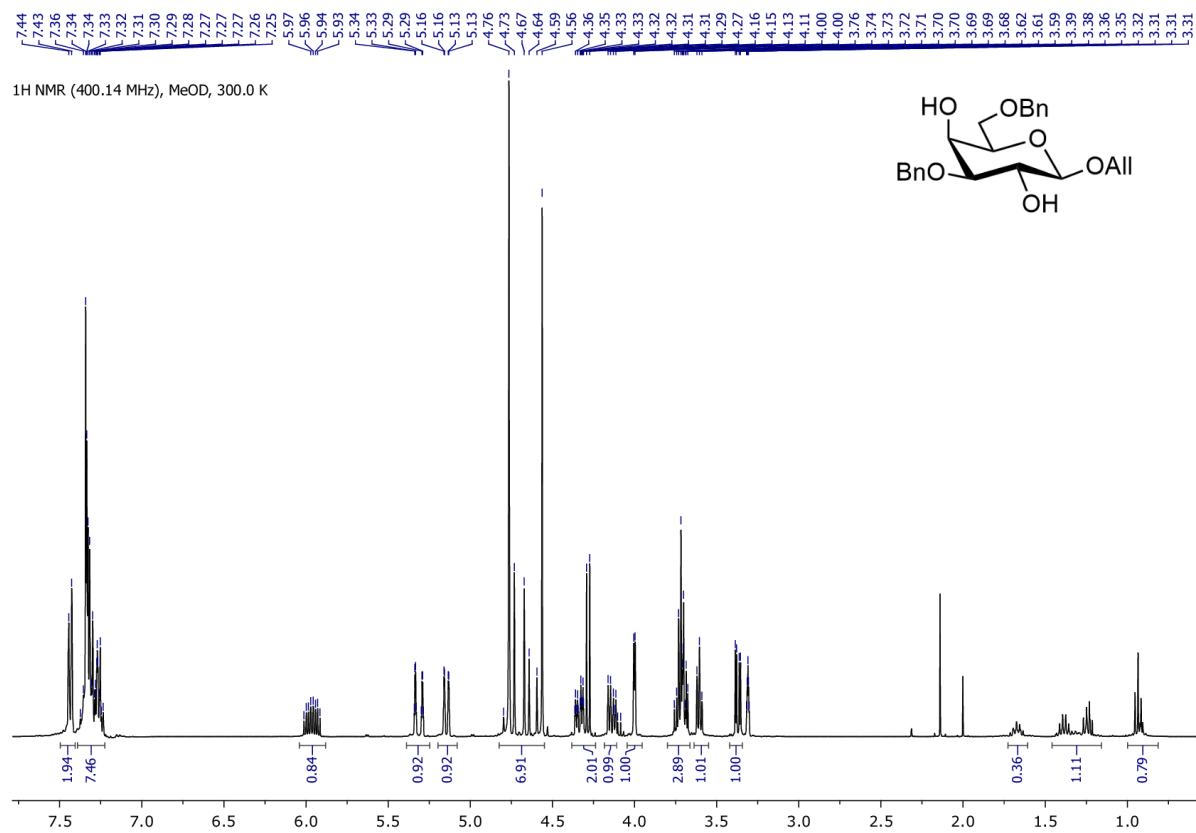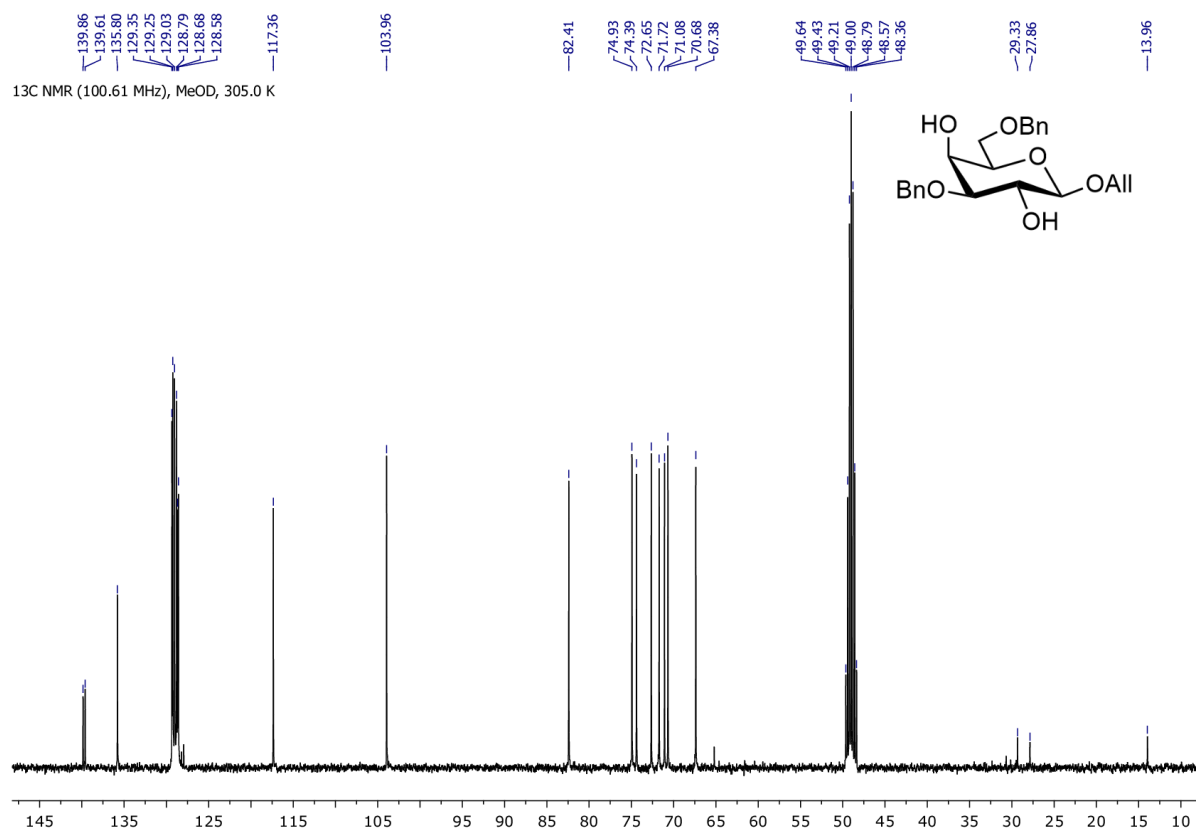



**Acquisition Parameter**

|             |            |                      |          |                  |           |
|-------------|------------|----------------------|----------|------------------|-----------|
| Source Type | ESI        | Ion Polarity         | Positive | Set Nebulizer    | 0.4 Bar   |
| Focus       | Not active |                      |          | Set Dry Heater   | 180 °C    |
| Scan Begin  | 50 m/z     | Set Capillary        | 4500 V   | Set Dry Gas      | 4.0 l/min |
| Scan End    | 3000 m/z   | Set End Plate Offset | -500 V   | Set Divert Valve | Waste     |

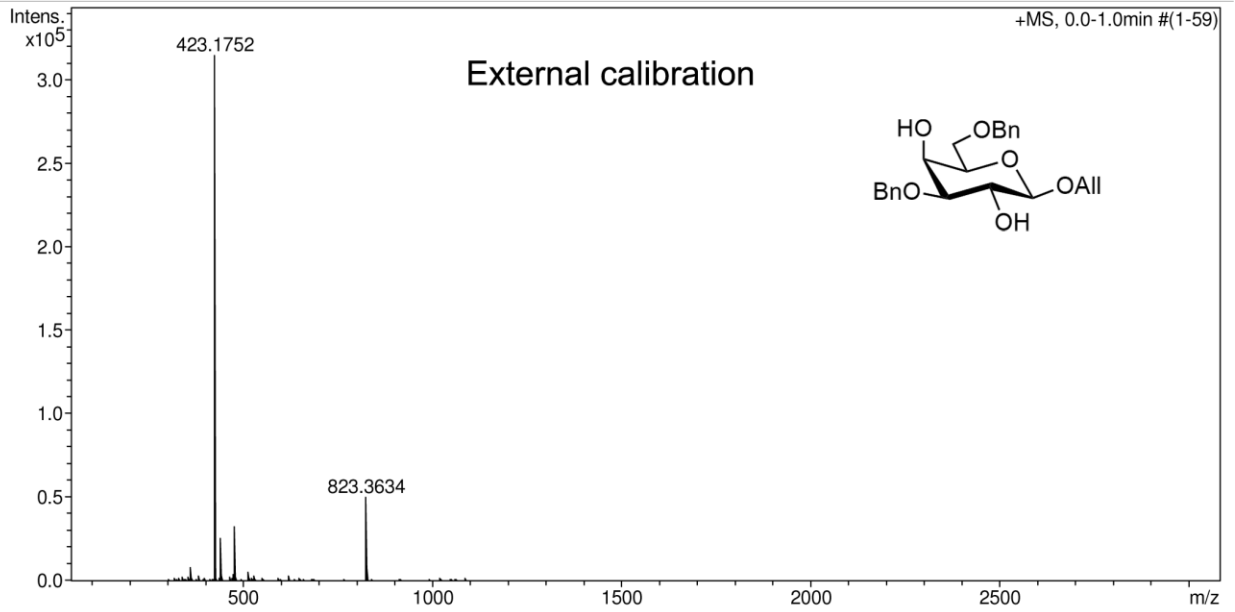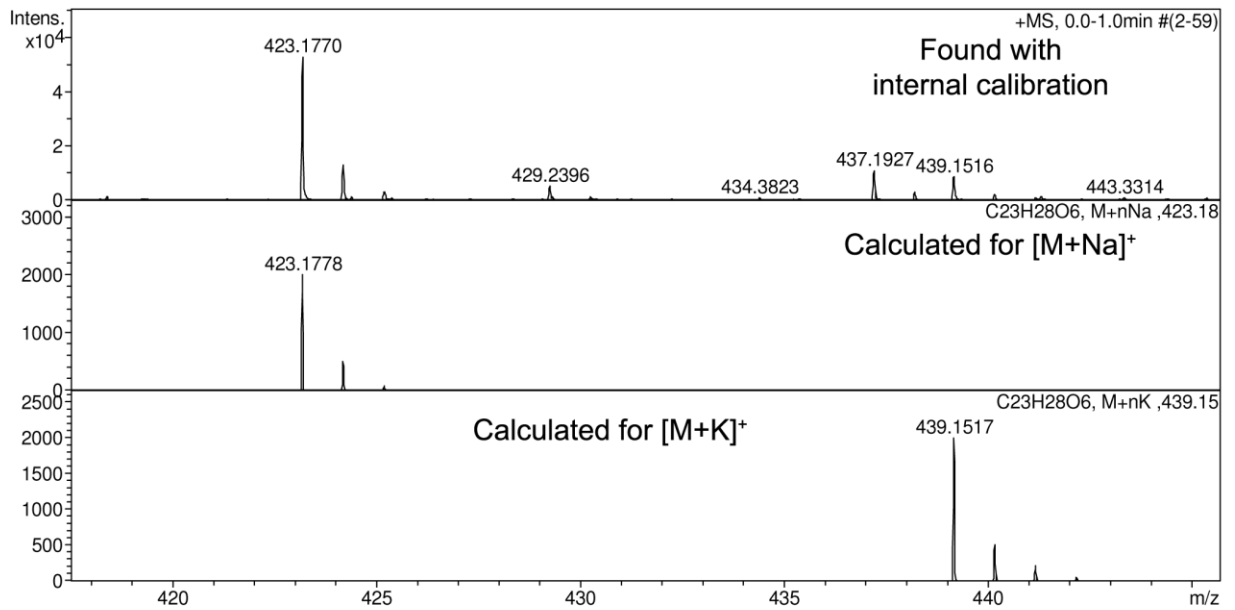

# Disodium salt of allyl 3,6-di-O-benzyl-2,5-di-O-sulfo-β-D-galactofuranoside (9)

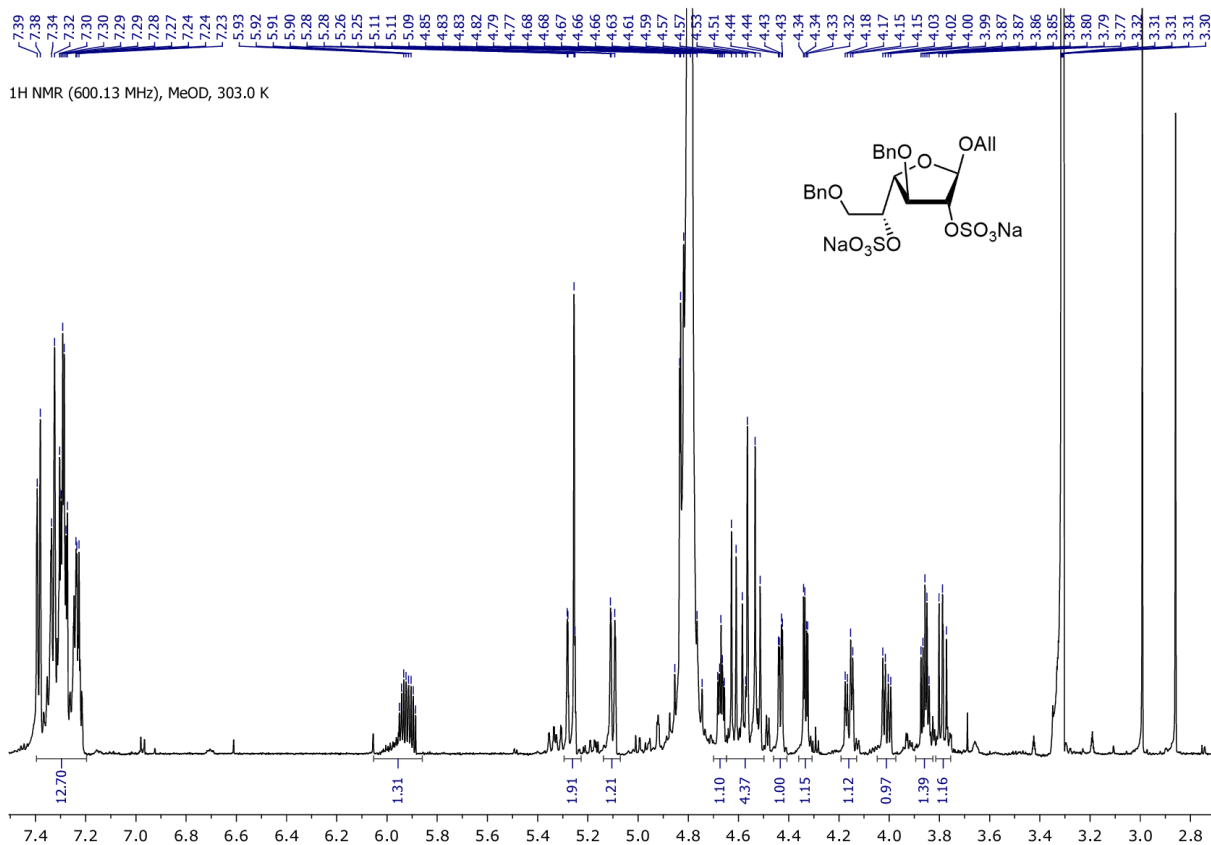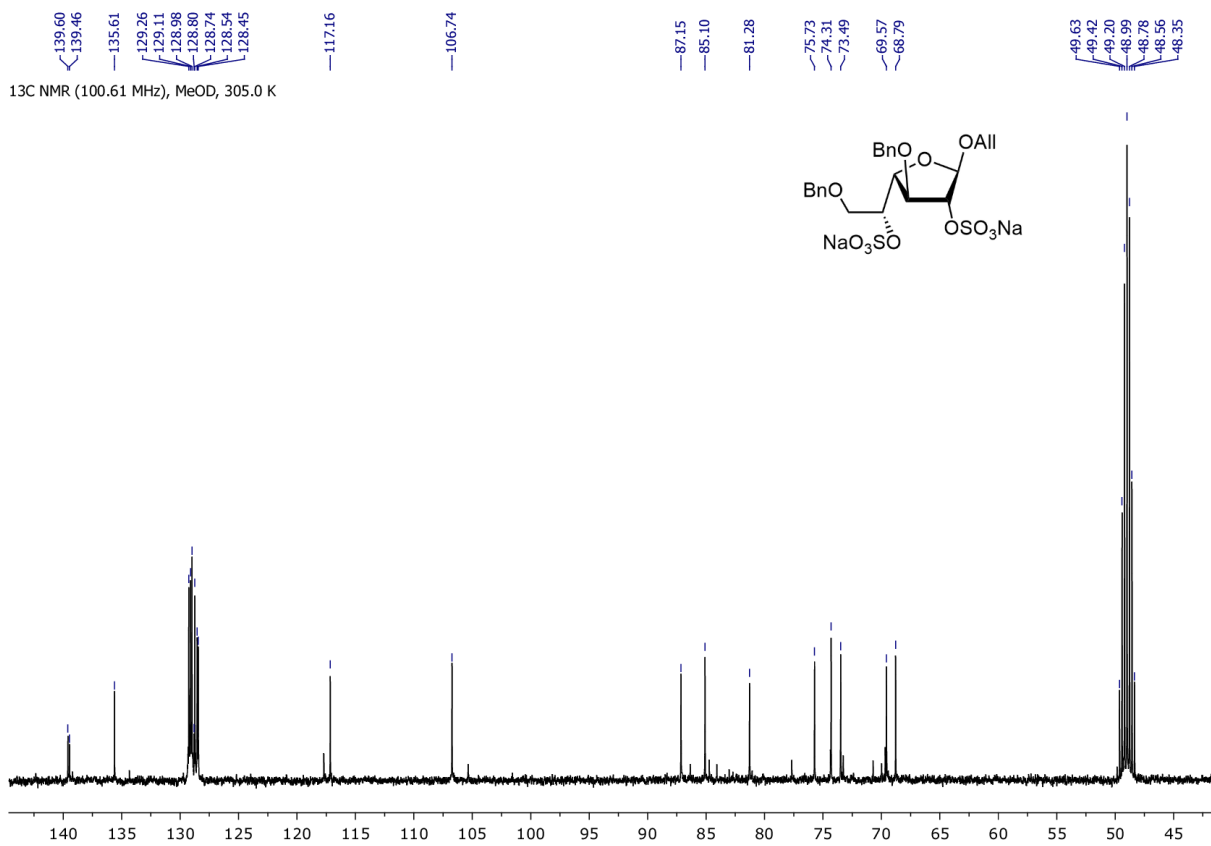



# Allyl 3,6-di-O-benzyl-β-D-galactofuranoside (10)

7.34, 7.33, 7.32, 7.31, 7.30, 7.29, 7.28, 7.27, 5.95, 5.90, 5.30, 5.30, 5.26, 5.26, 5.15, 5.15, 5.13, 5.12, 4.94, 4.81, 4.80, 4.78, 4.74, 4.71, 4.68, 4.55, 4.54, 4.52, 4.51, 4.48, 4.20, 4.19, 4.17, 4.16, 4.15, 4.10, 4.09, 4.08, 4.07, 4.01, 4.01, 4.00, 4.00, 3.98, 3.96, 3.94, 3.93, 3.93, 3.92, 3.85, 3.84, 3.84, 3.83, 3.82, 3.81, 3.58, 3.56, 3.55, 3.54, 3.54, 3.52, 3.51, 3.49, 3.32, 3.31, 3.31, 3.30

<sup>1</sup>H NMR (400.14 MHz), MeOD, 305.0 K

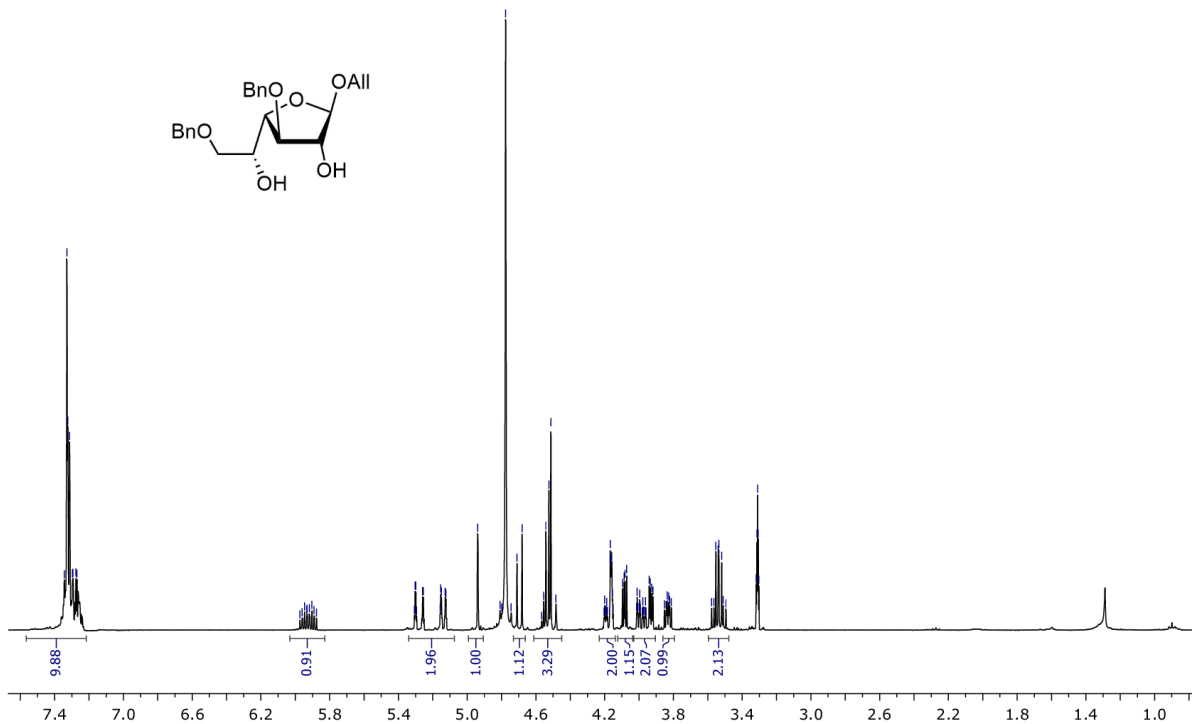

139.61, 139.43, 135.80, 129.33, 128.94, 128.83, 128.70, 128.63, 117.09, 109.12, 86.83, 83.57, 81.42, 74.31, 73.13, 72.61, 71.08, 69.04, 49.64, 49.43, 49.21, 49.00, 48.79, 48.58, 48.36

<sup>13</sup>C NMR (100.61 MHz), MeOD, 305.0 K

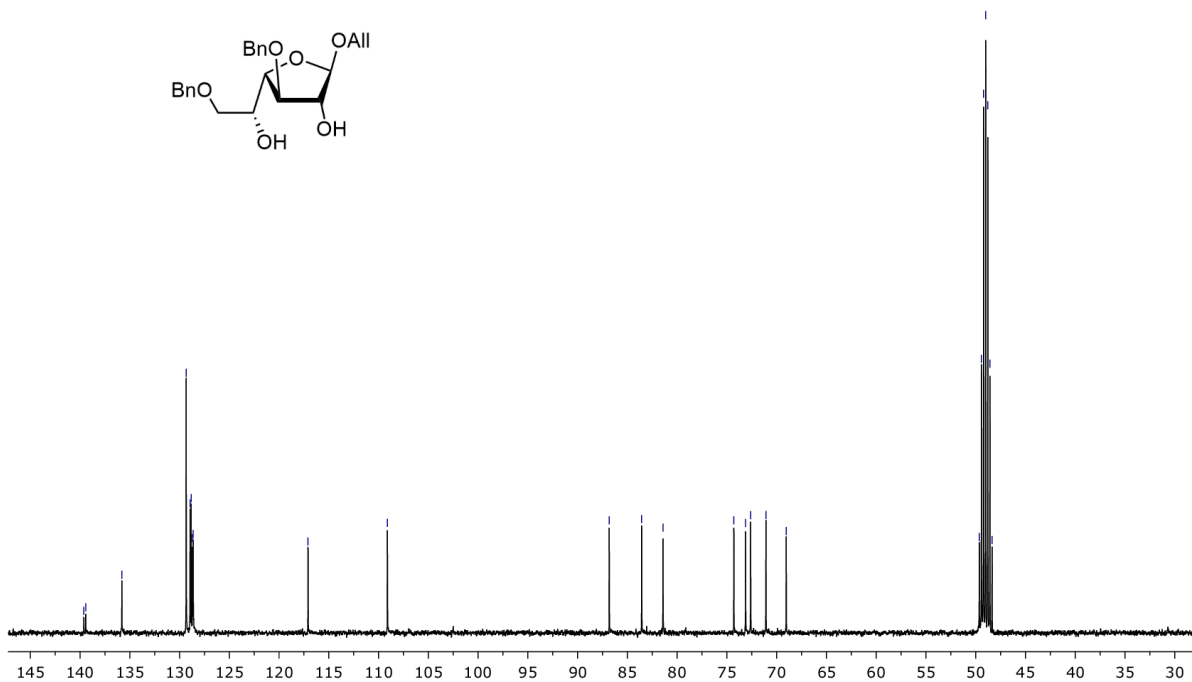

**Acquisition Parameter**

|             |            |                      |          |                  |           |
|-------------|------------|----------------------|----------|------------------|-----------|
| Source Type | ESI        | Ion Polarity         | Positive | Set Nebulizer    | 0.4 Bar   |
| Focus       | Not active |                      |          | Set Dry Heater   | 180 °C    |
| Scan Begin  | 50 m/z     | Set Capillary        | 4500 V   | Set Dry Gas      | 4.0 l/min |
| Scan End    | 3000 m/z   | Set End Plate Offset | -500 V   | Set Divert Valve | Waste     |

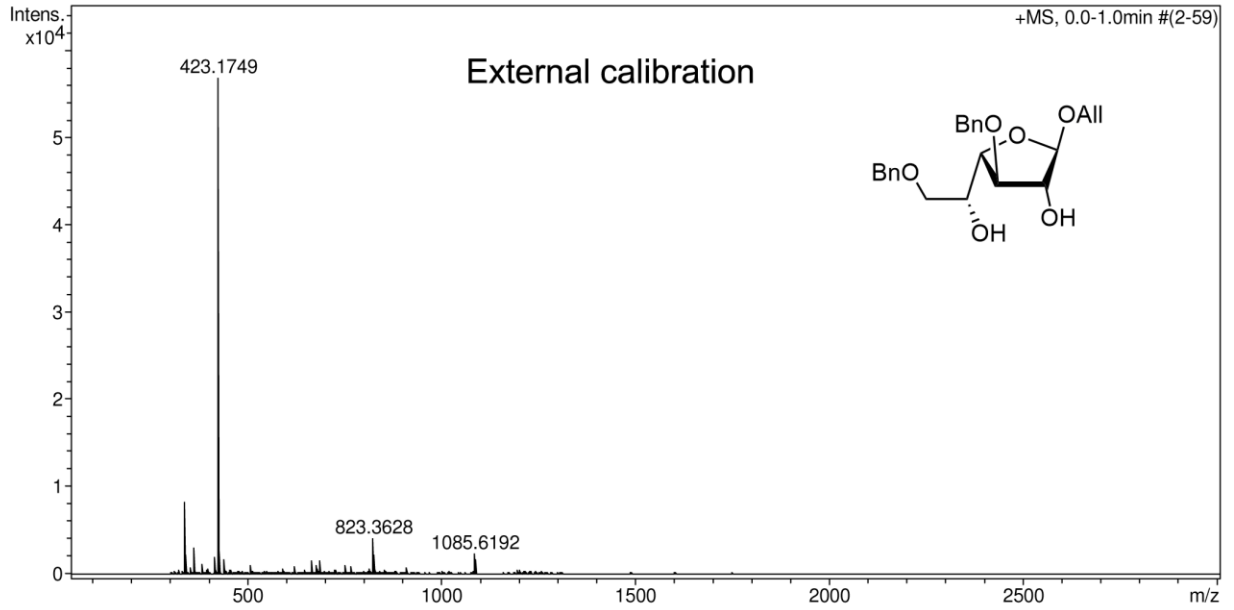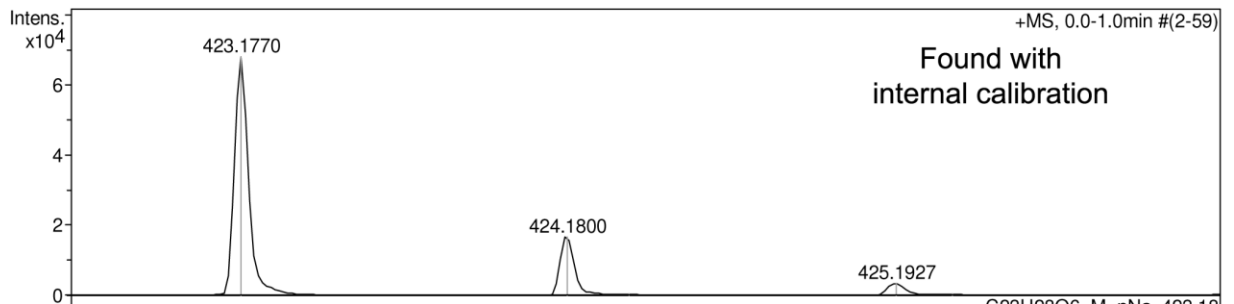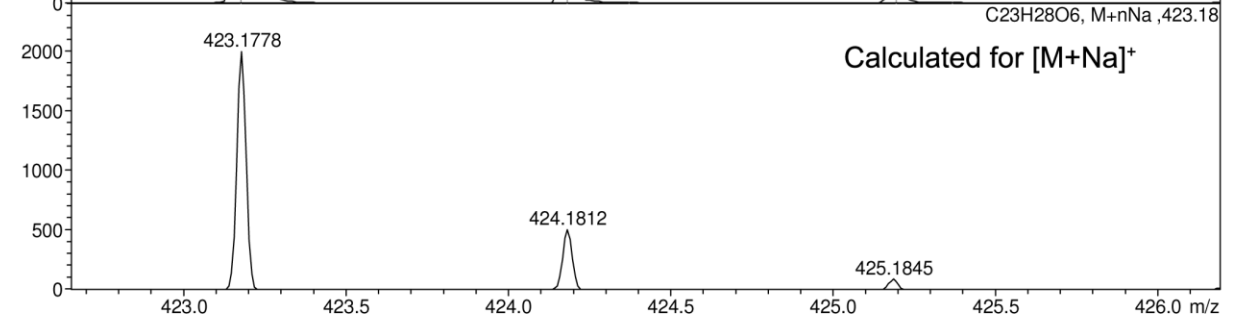

# Allyl 3,6-di-O-benzyl-2-O-chloroacetyl-β-D-galactofuranoside (11)

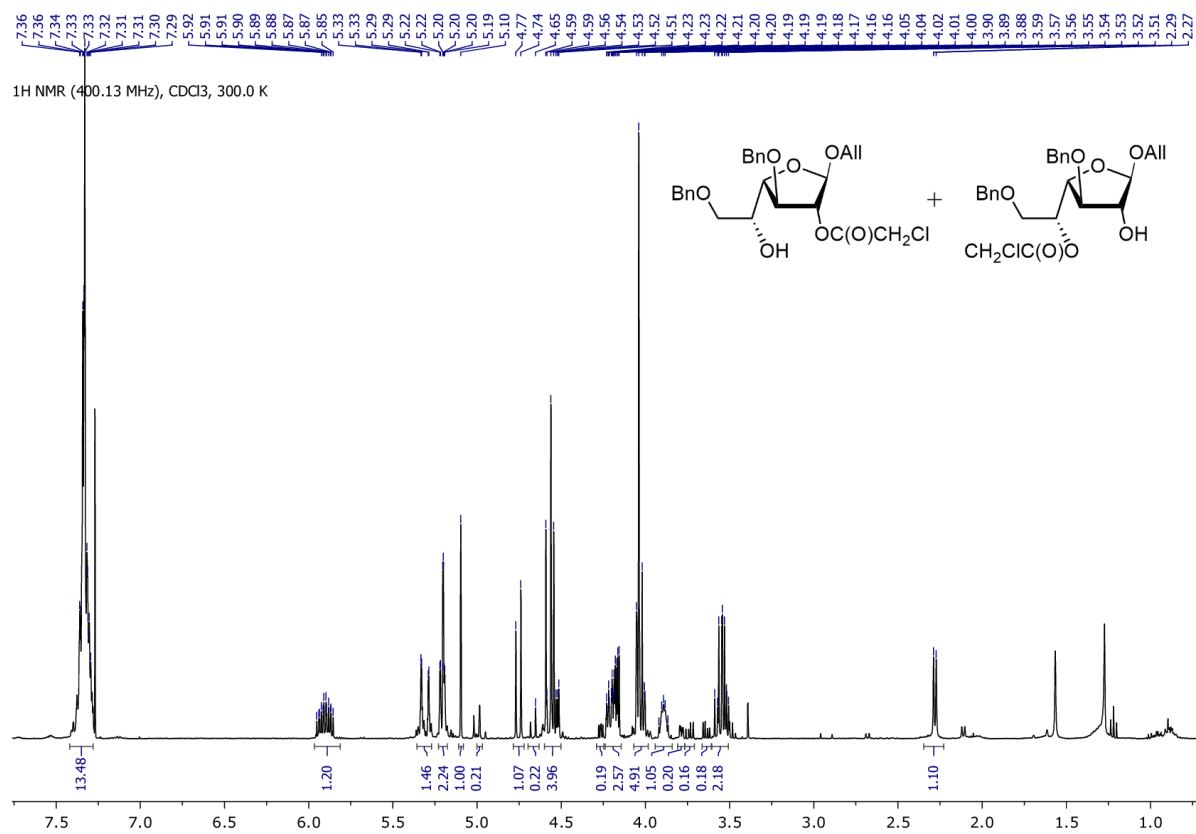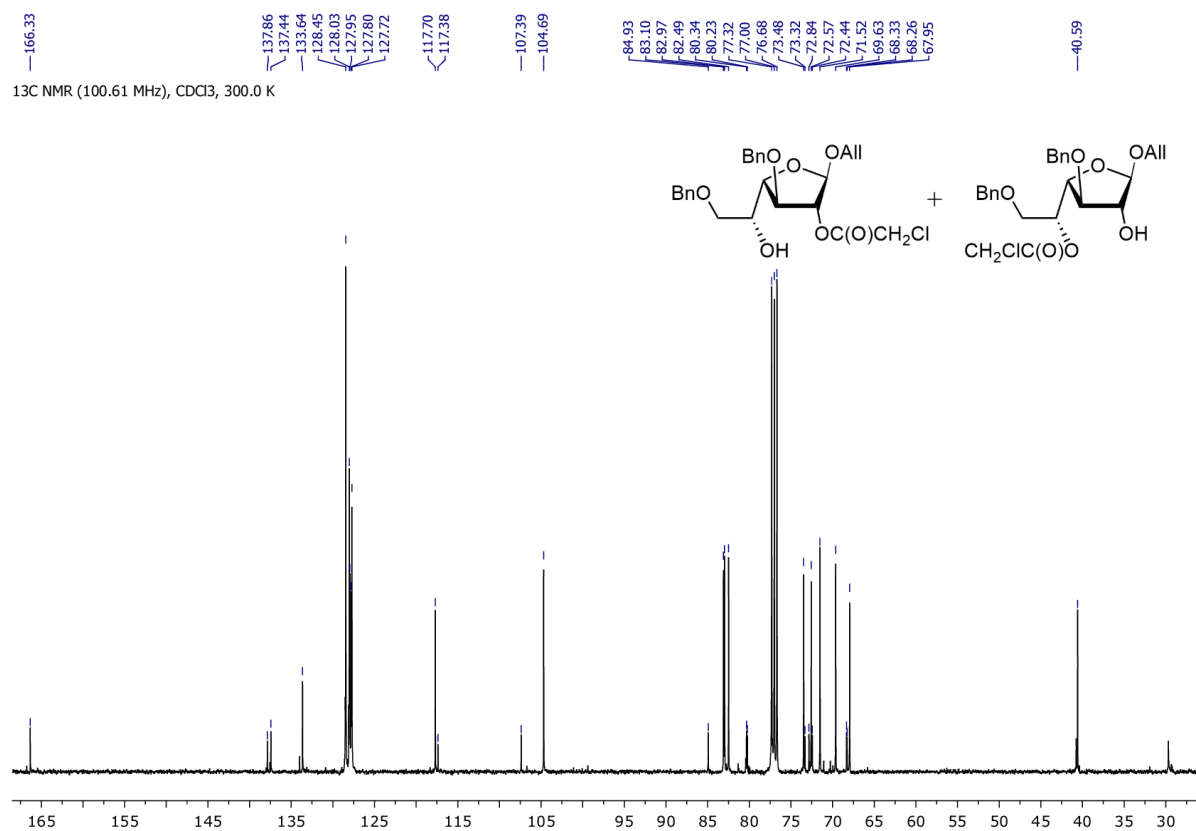

**Acquisition Parameter**

|             |          |                       |            |                  |           |
|-------------|----------|-----------------------|------------|------------------|-----------|
| Source Type | ESI      | Ion Polarity          | Positive   | Set Nebulizer    | 0.4 Bar   |
| Focus       | Active   | Set Capillary         | 4500 V     | Set Dry Heater   | 180 °C    |
| Scan Begin  | 50 m/z   | Set End Plate Offset  | -500 V     | Set Dry Gas      | 4.0 l/min |
| Scan End    | 3000 m/z | Set Collision Cell RF | 1200.0 Vpp | Set Divert Valve | Waste     |

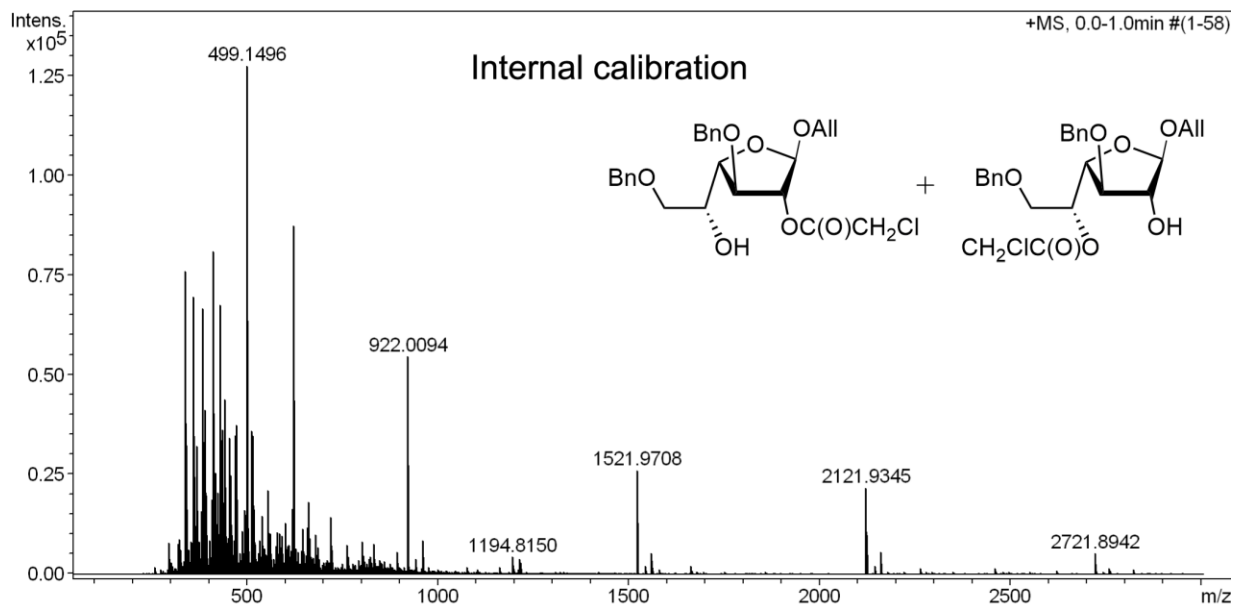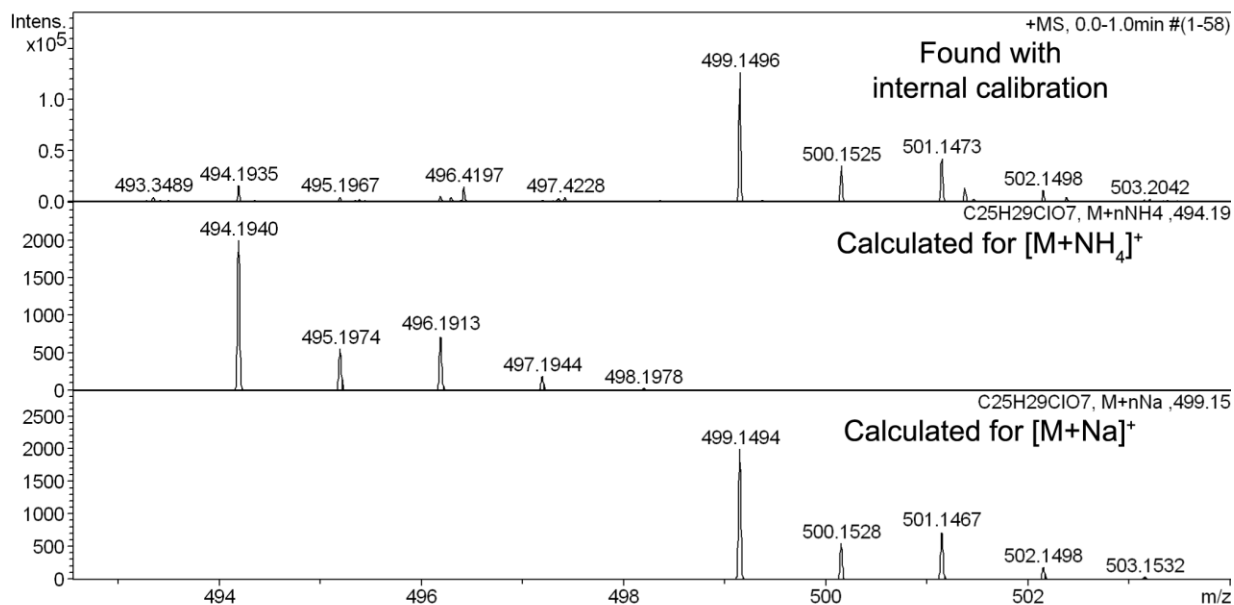

# Allyl 3,6-di-O-benzyl-5-O-chloroacetyl-β-D-galactofuranoside (12)

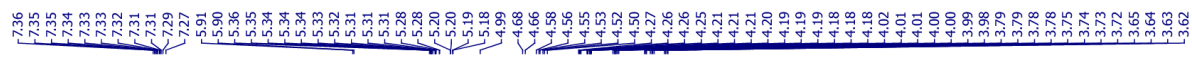

<sup>1</sup>H NMR (600.13 MHz), CDCl<sub>3</sub>, 300.3 K

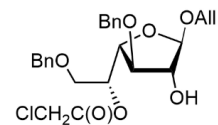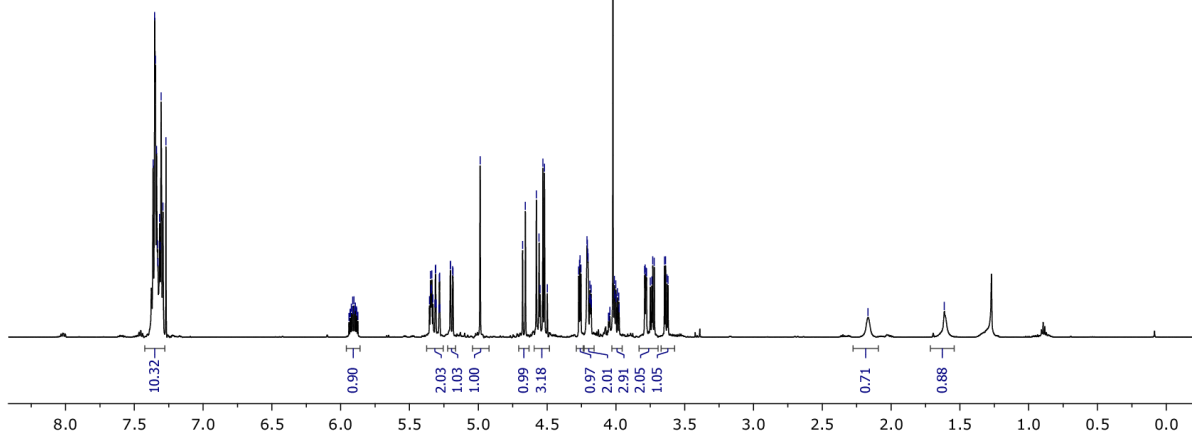

<sup>13</sup>C NMR (150.92 MHz), CDCl<sub>3</sub>, 300.6 K

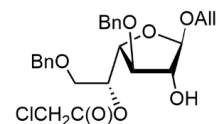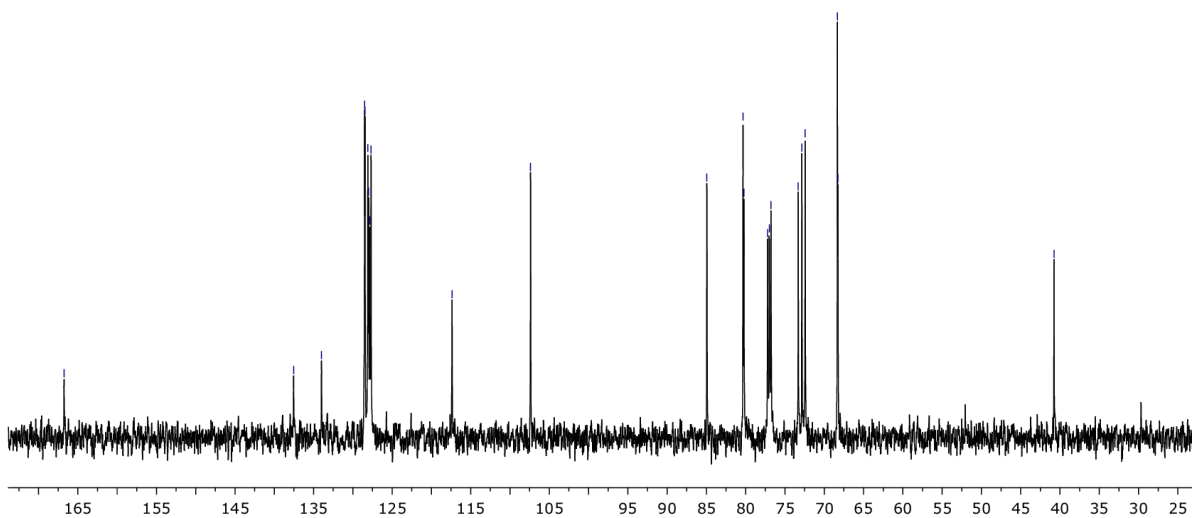



**Acquisition Parameter**

|             |            |                      |          |                  |           |
|-------------|------------|----------------------|----------|------------------|-----------|
| Source Type | ESI        | Ion Polarity         | Positive | Set Nebulizer    | 0.4 Bar   |
| Focus       | Not active |                      |          | Set Dry Heater   | 180 °C    |
| Scan Begin  | 50 m/z     | Set Capillary        | 4500 V   | Set Dry Gas      | 4.0 l/min |
| Scan End    | 3000 m/z   | Set End Plate Offset | -500 V   | Set Divert Valve | Waste     |

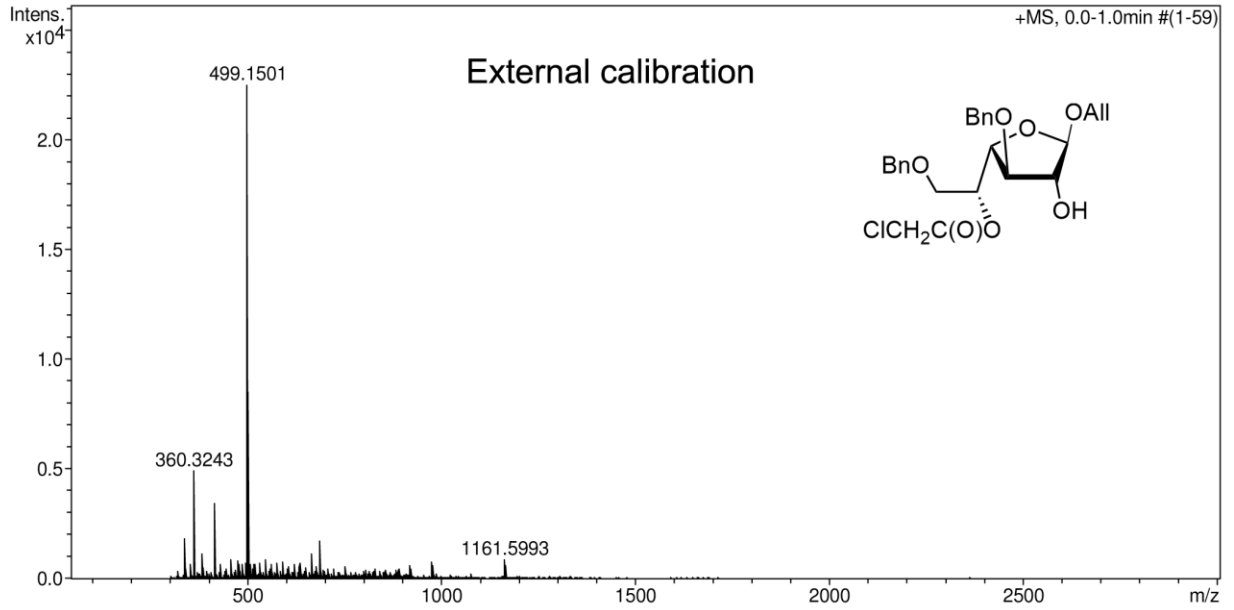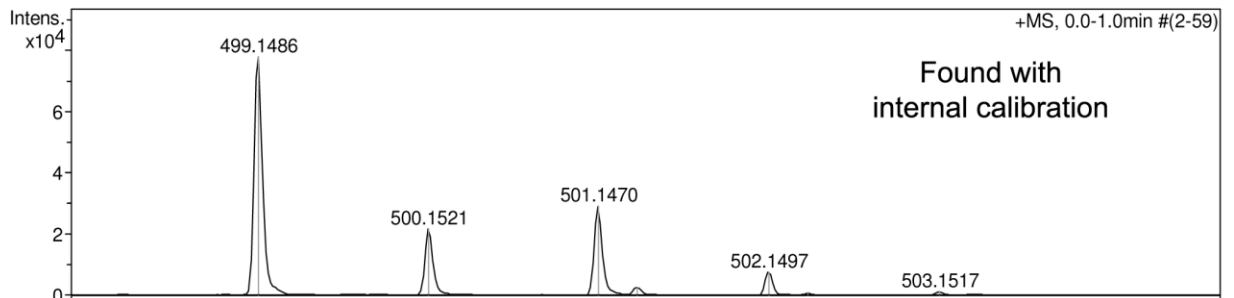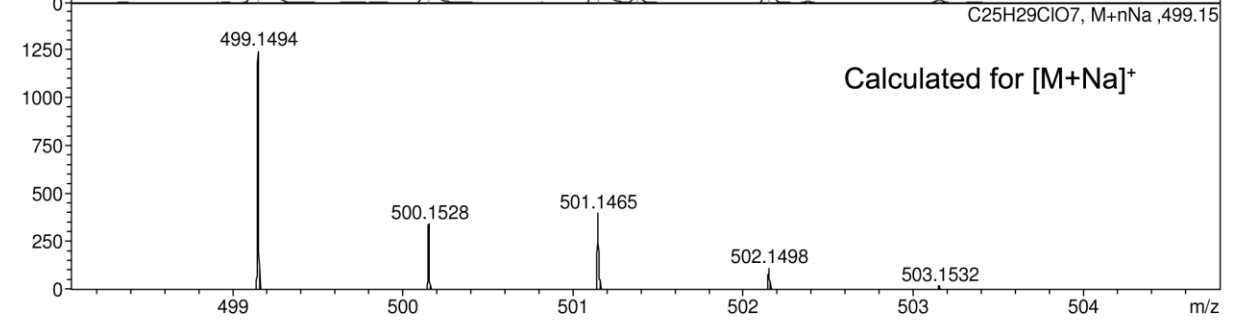

# Allyl 2-O-benzoyl-3,6-di-O-benzyl-β-D-galactofuranoside (13) from diol 10

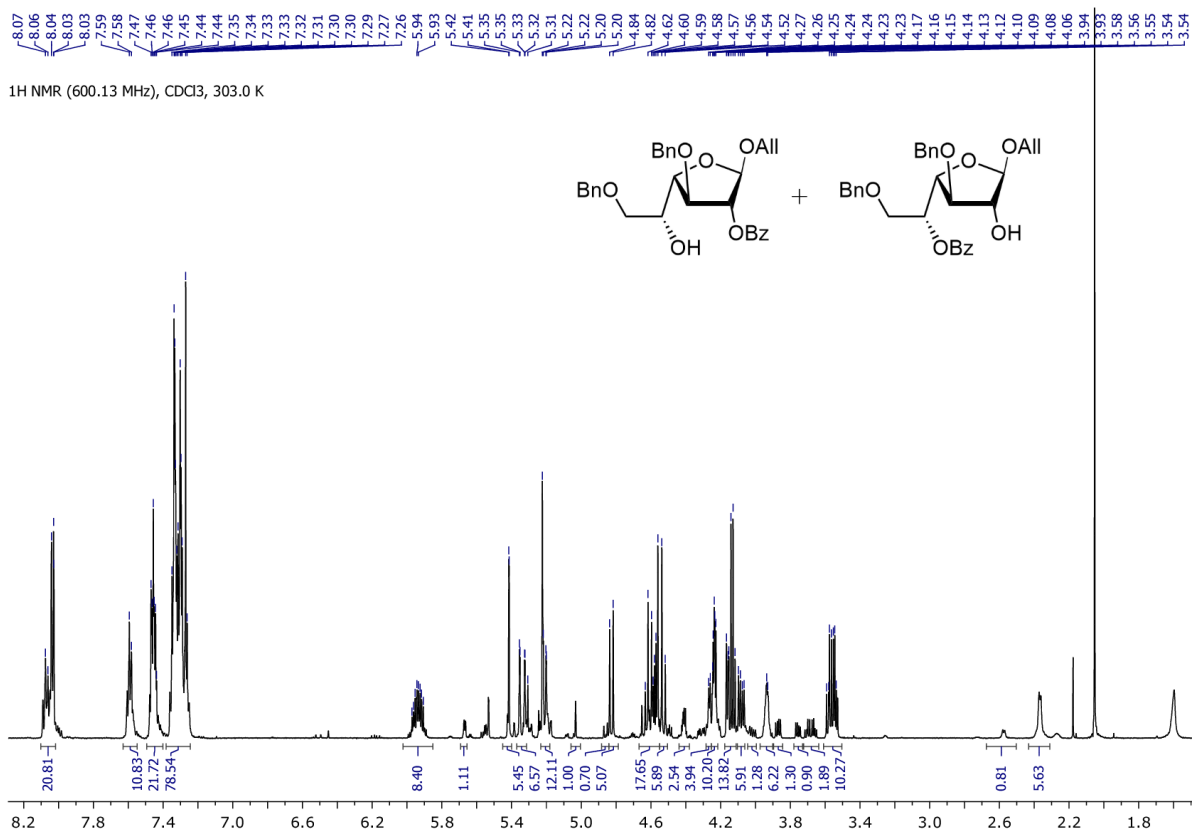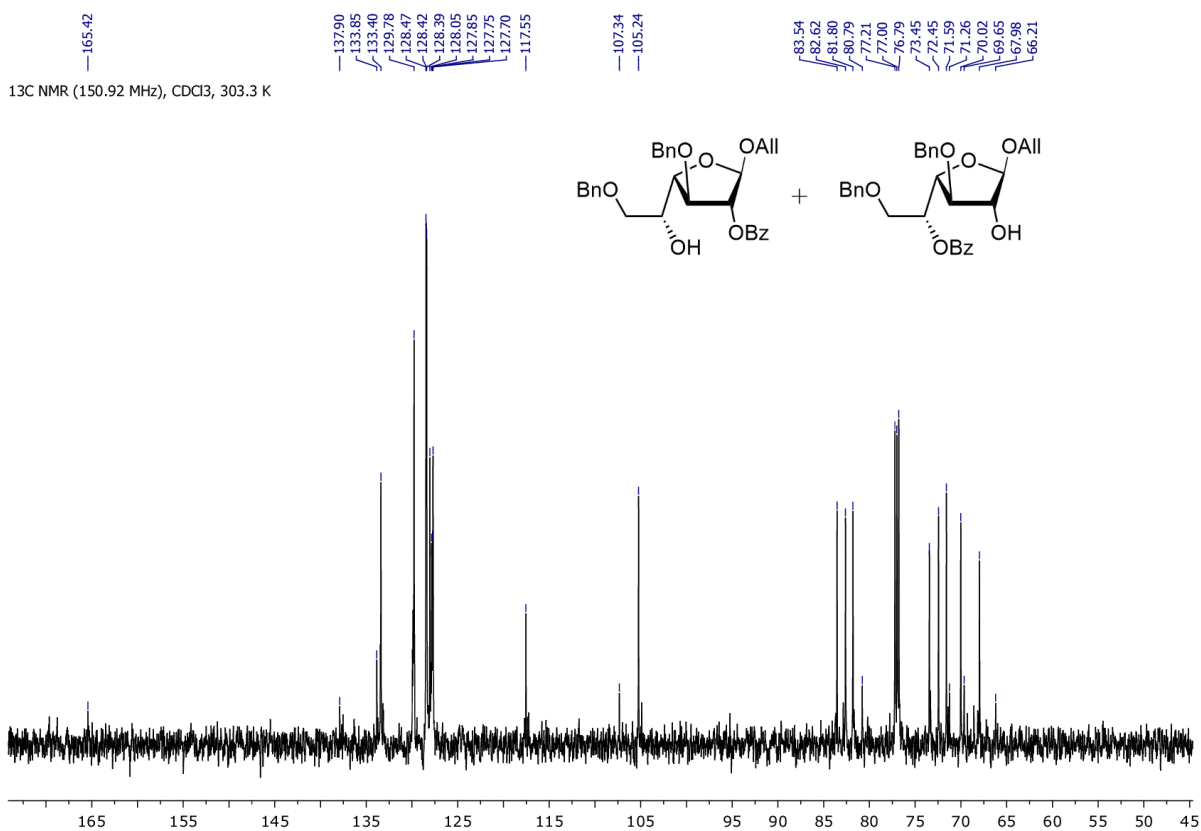

# Allyl 2-O-benzoyl-3,6-di-O-benzyl-5-O-chloroacetyl-β-D-galactofuranoside (15)

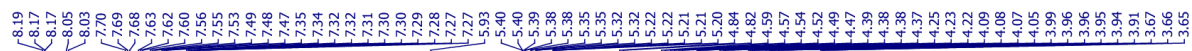

<sup>1</sup>H NMR (600.13 MHz), CDCl<sub>3</sub>, 303.0 K

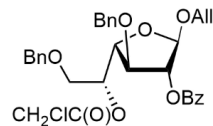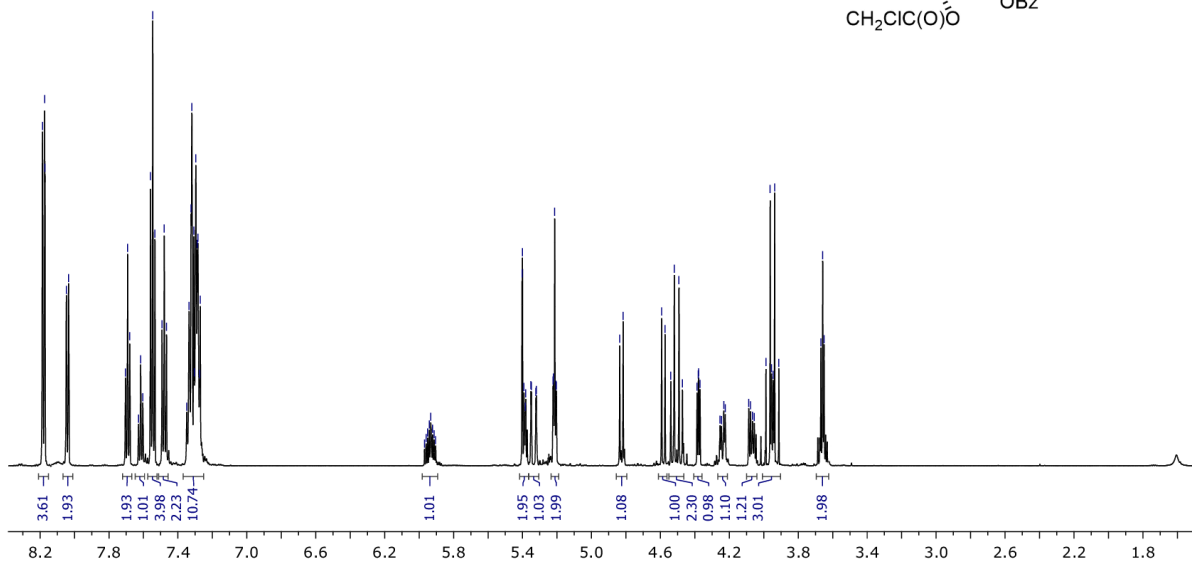

<sup>13</sup>C NMR (150.91 MHz), CDCl<sub>3</sub>, 303.1 K

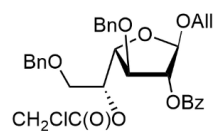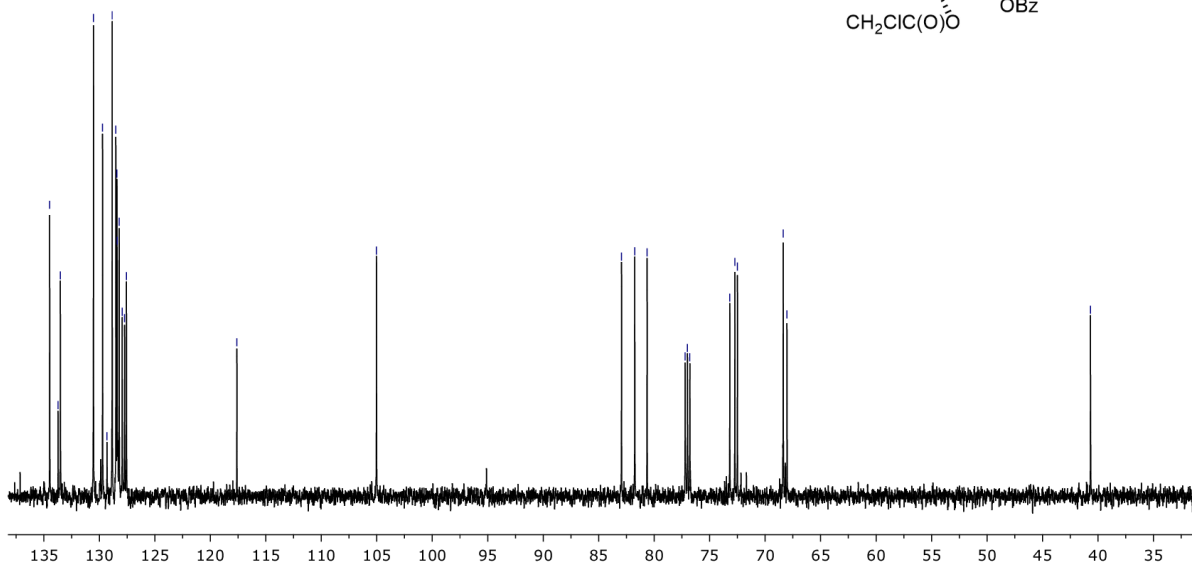

**Acquisition Parameter**

|             |            |                      |          |                  |           |
|-------------|------------|----------------------|----------|------------------|-----------|
| Source Type | ESI        | Ion Polarity         | Positive | Set Nebulizer    | 0.4 Bar   |
| Focus       | Not active |                      |          | Set Dry Heater   | 180 °C    |
| Scan Begin  | 50 m/z     | Set Capillary        | 4500 V   | Set Dry Gas      | 4.0 l/min |
| Scan End    | 3000 m/z   | Set End Plate Offset | -500 V   | Set Divert Valve | Waste     |

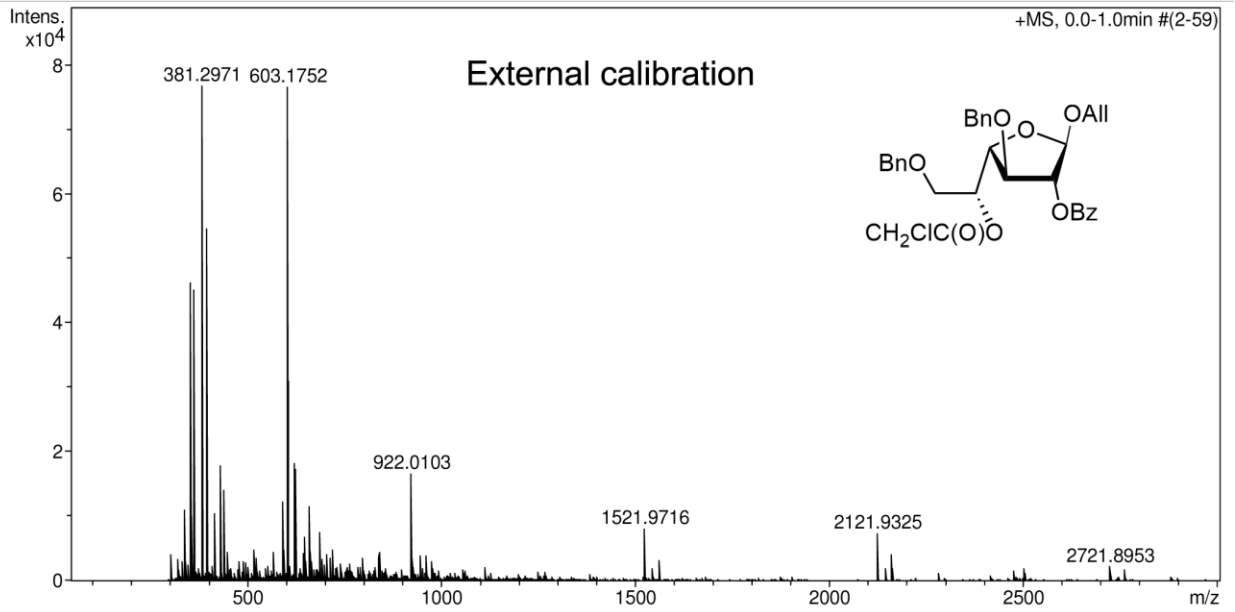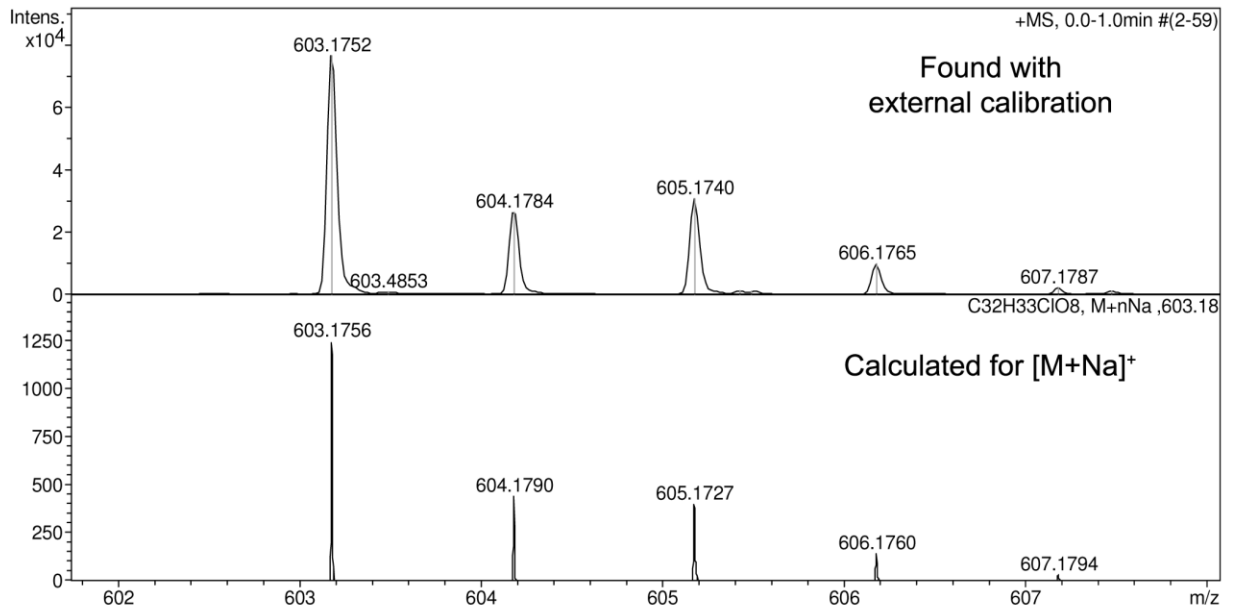

# Allyl 2-O-benzoyl-3,6-di-O-benzyl- $\beta$ -D-galactofuranoside (13) (pure, from 15)

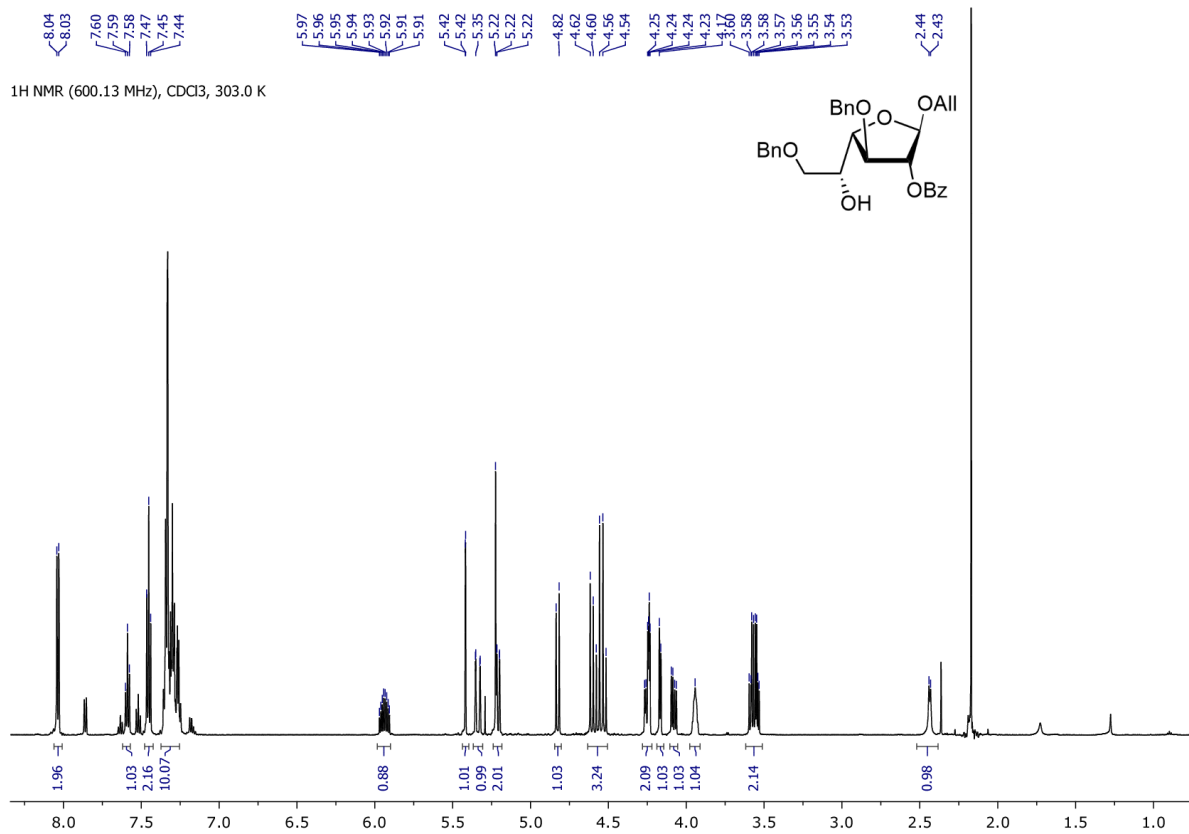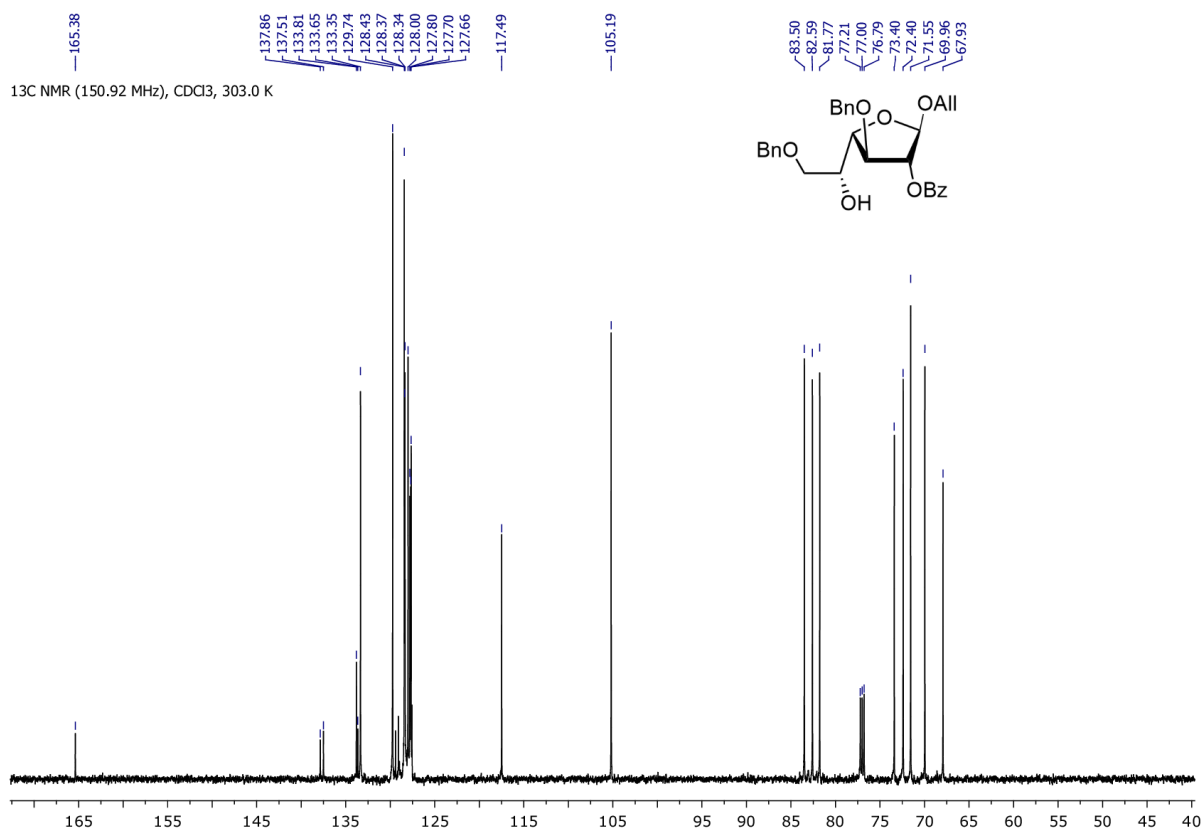

**Acquisition Parameter**

|             |          |                       |            |                  |           |
|-------------|----------|-----------------------|------------|------------------|-----------|
| Source Type | ESI      | Ion Polarity          | Positive   | Set Nebulizer    | 0.4 Bar   |
| Focus       | Active   | Set Capillary         | 4500 V     | Set Dry Heater   | 180 °C    |
| Scan Begin  | 50 m/z   | Set End Plate Offset  | -500 V     | Set Dry Gas      | 4.0 l/min |
| Scan End    | 3000 m/z | Set Collision Cell RF | 1200.0 Vpp | Set Divert Valve | Waste     |

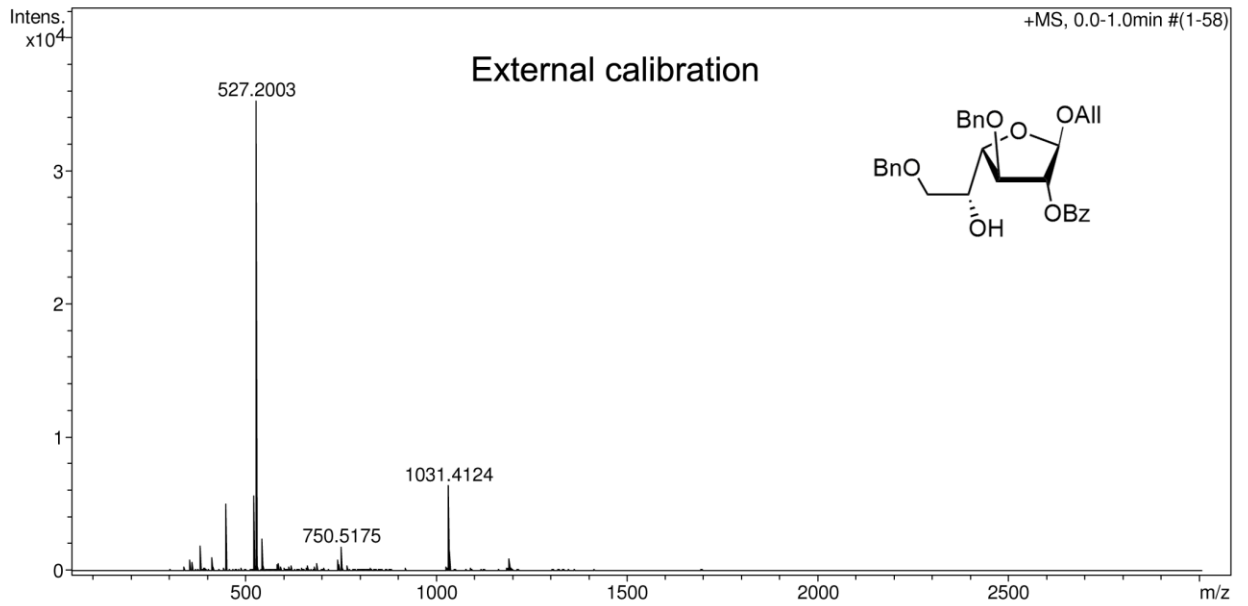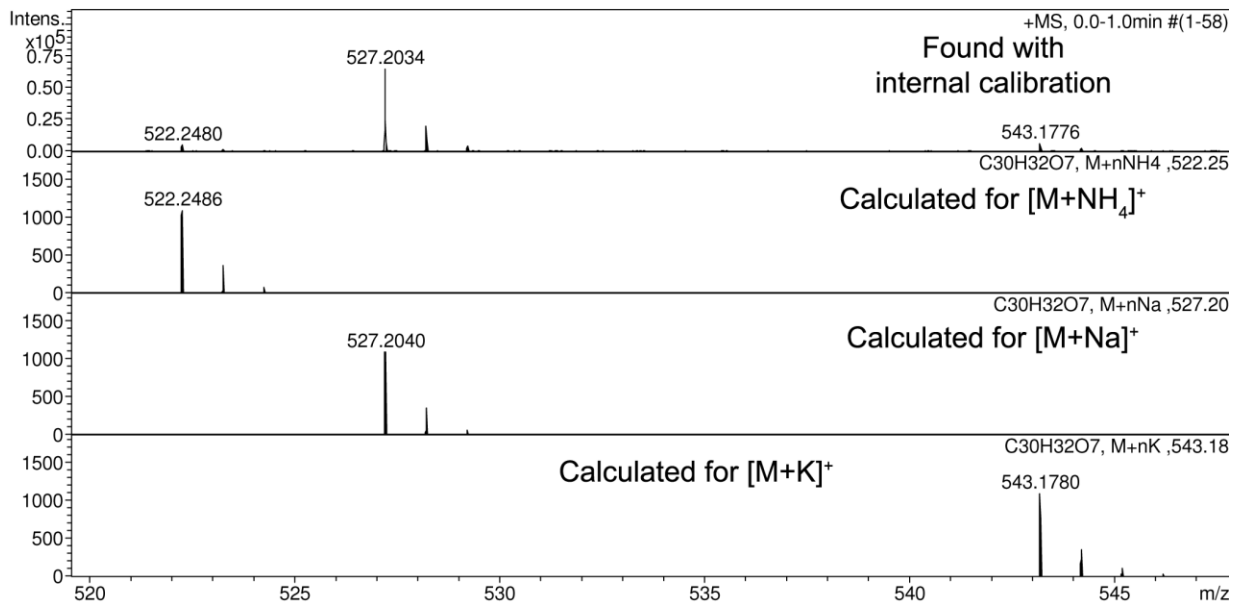

## 2-O-benzoyl-3,6-di-O-benzyl-5-O-chloroacetyl-D-galactofuranose (16)

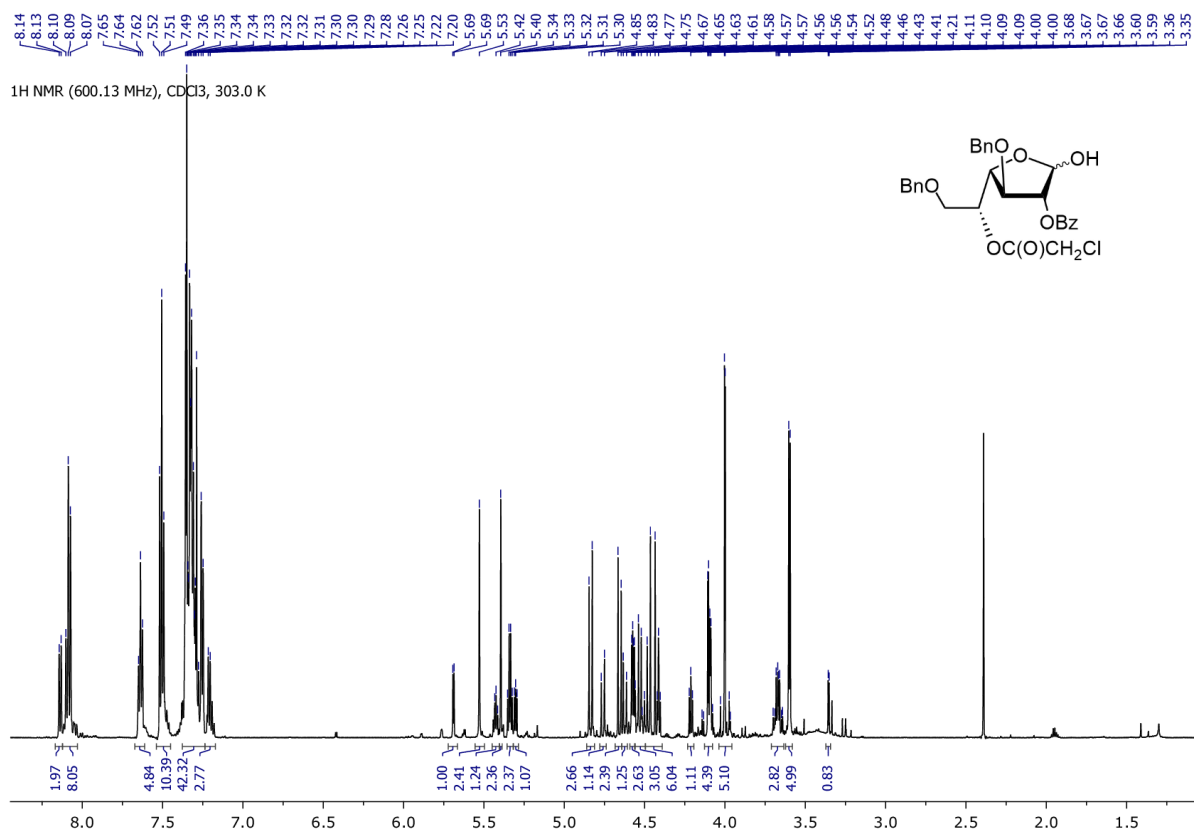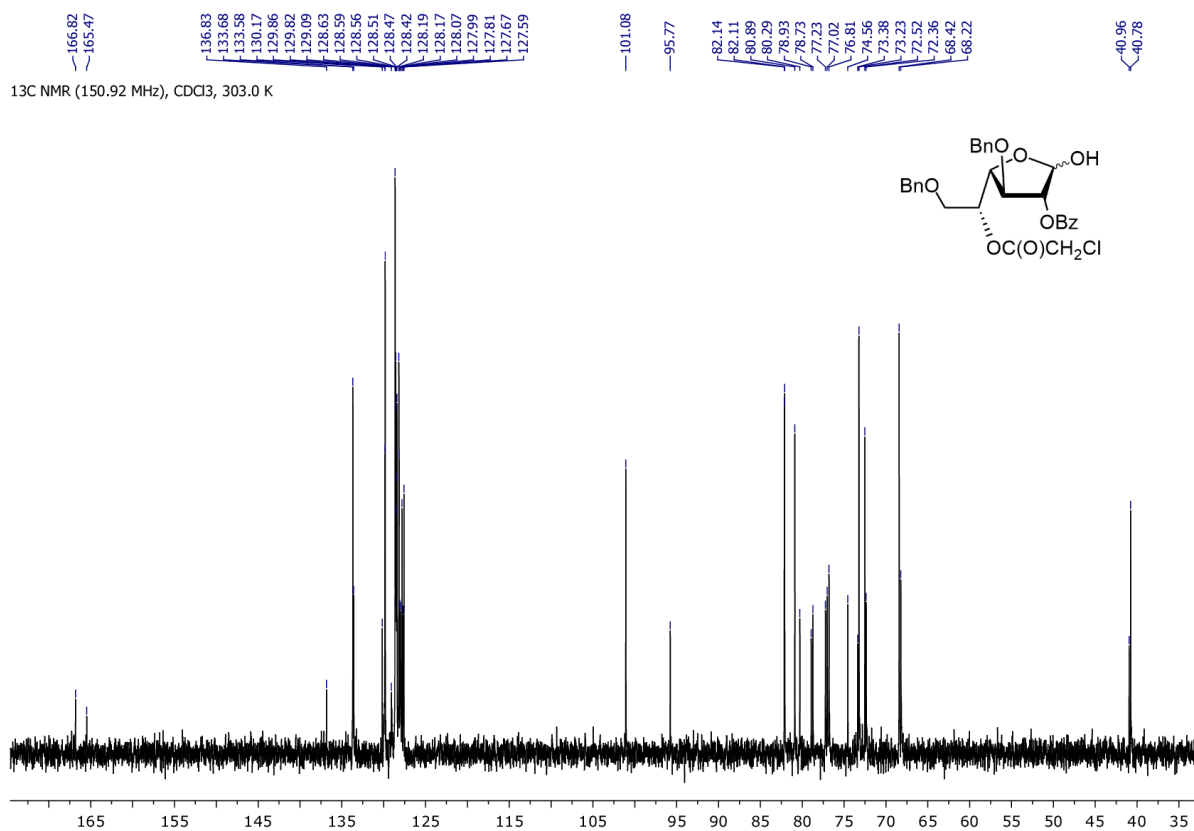

**Acquisition Parameter**

|             |            |                      |          |                  |           |
|-------------|------------|----------------------|----------|------------------|-----------|
| Source Type | ESI        | Ion Polarity         | Positive | Set Nebulizer    | 0.4 Bar   |
| Focus       | Not active |                      |          | Set Dry Heater   | 180 °C    |
| Scan Begin  | 50 m/z     | Set Capillary        | 4500 V   | Set Dry Gas      | 4.0 l/min |
| Scan End    | 3000 m/z   | Set End Plate Offset | -500 V   | Set Divert Valve | Waste     |

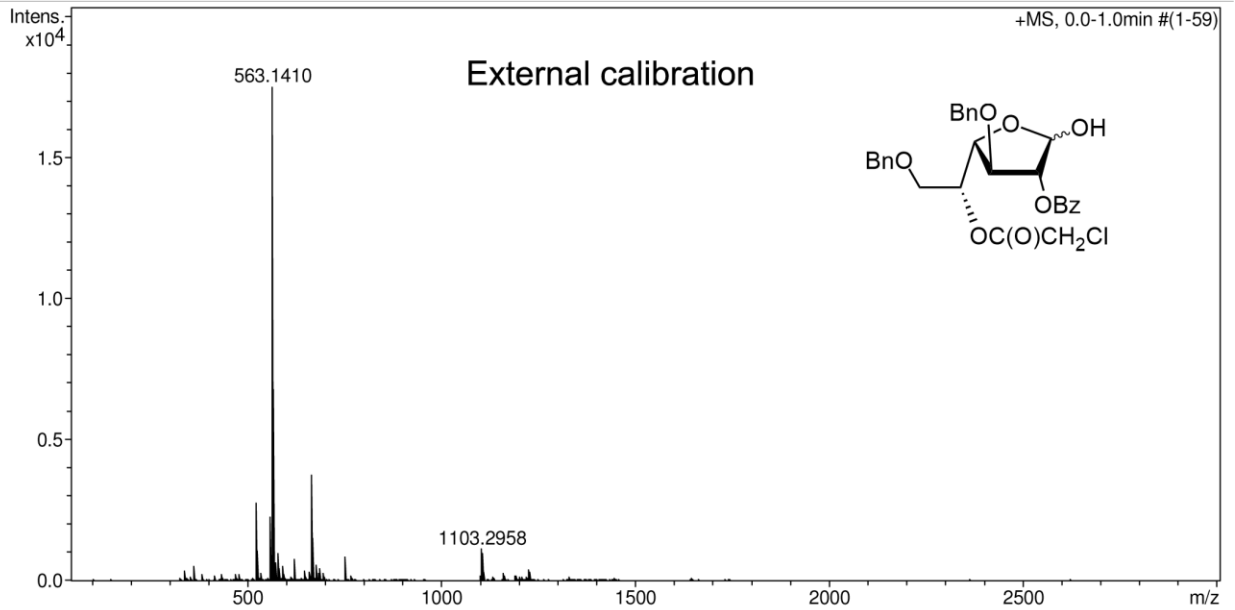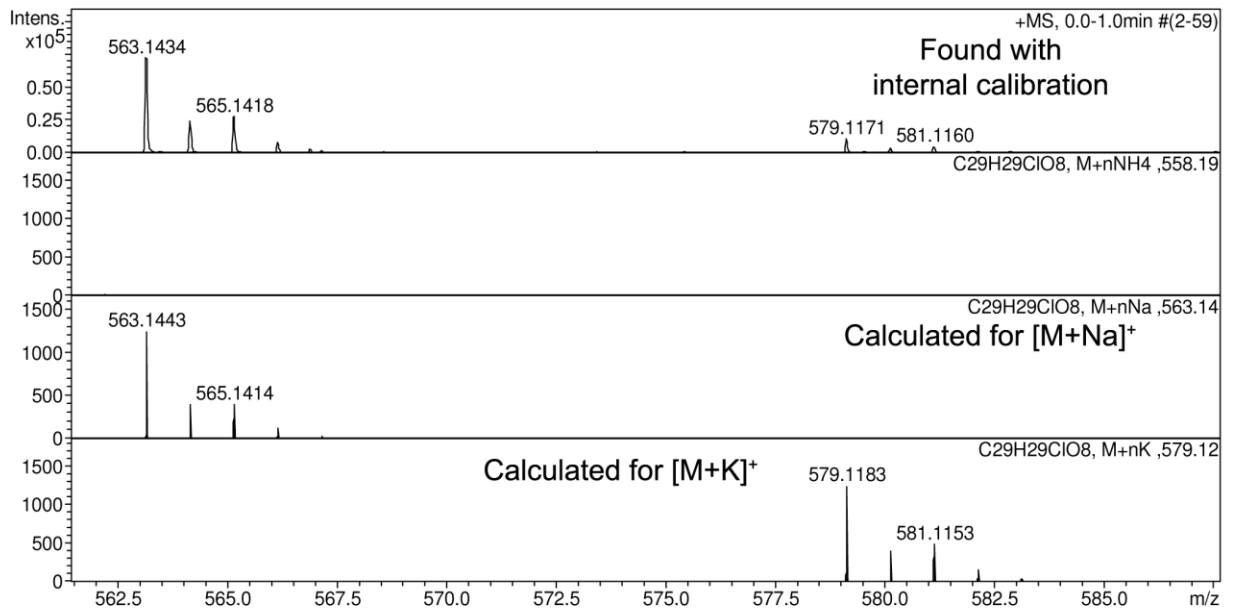



## 2-O-benzoyl-3,6-di-O-benzyl-5-O-chloroacetyl- $\beta$ -D-galactofuranoside trichloroacetimidate (17)

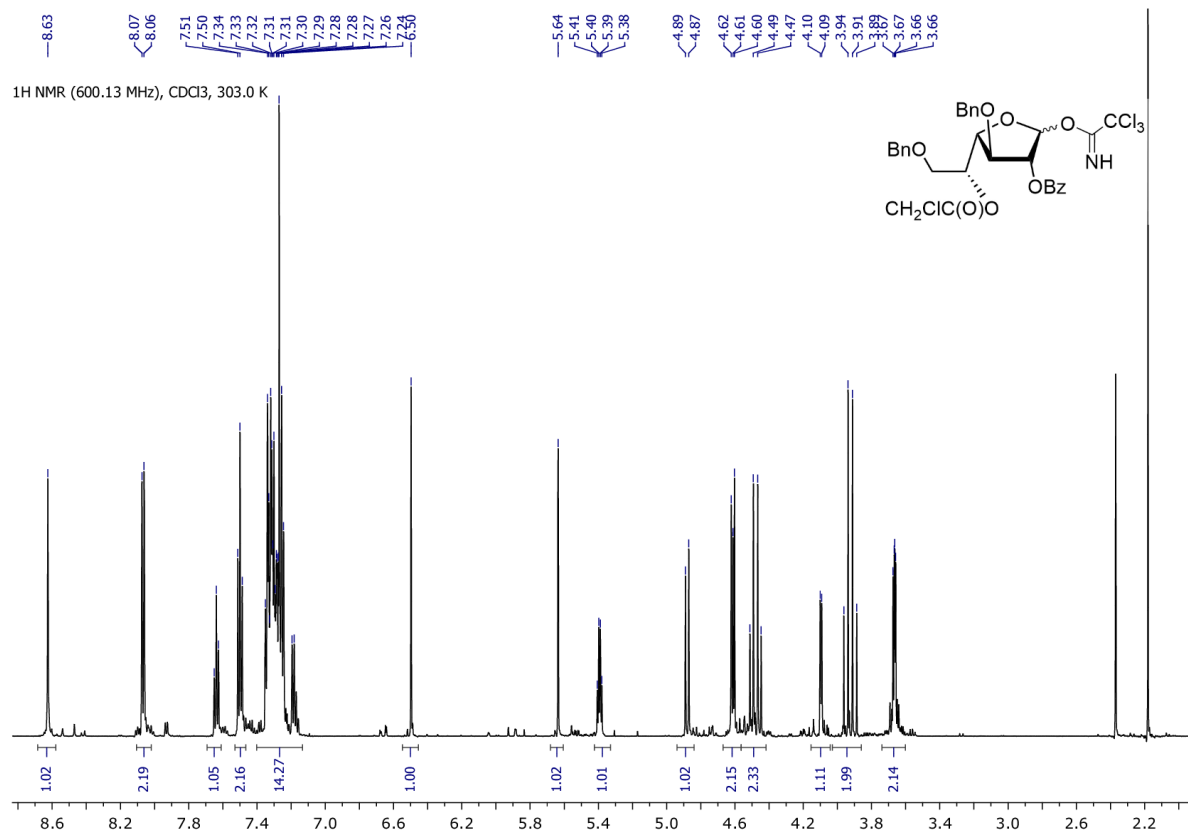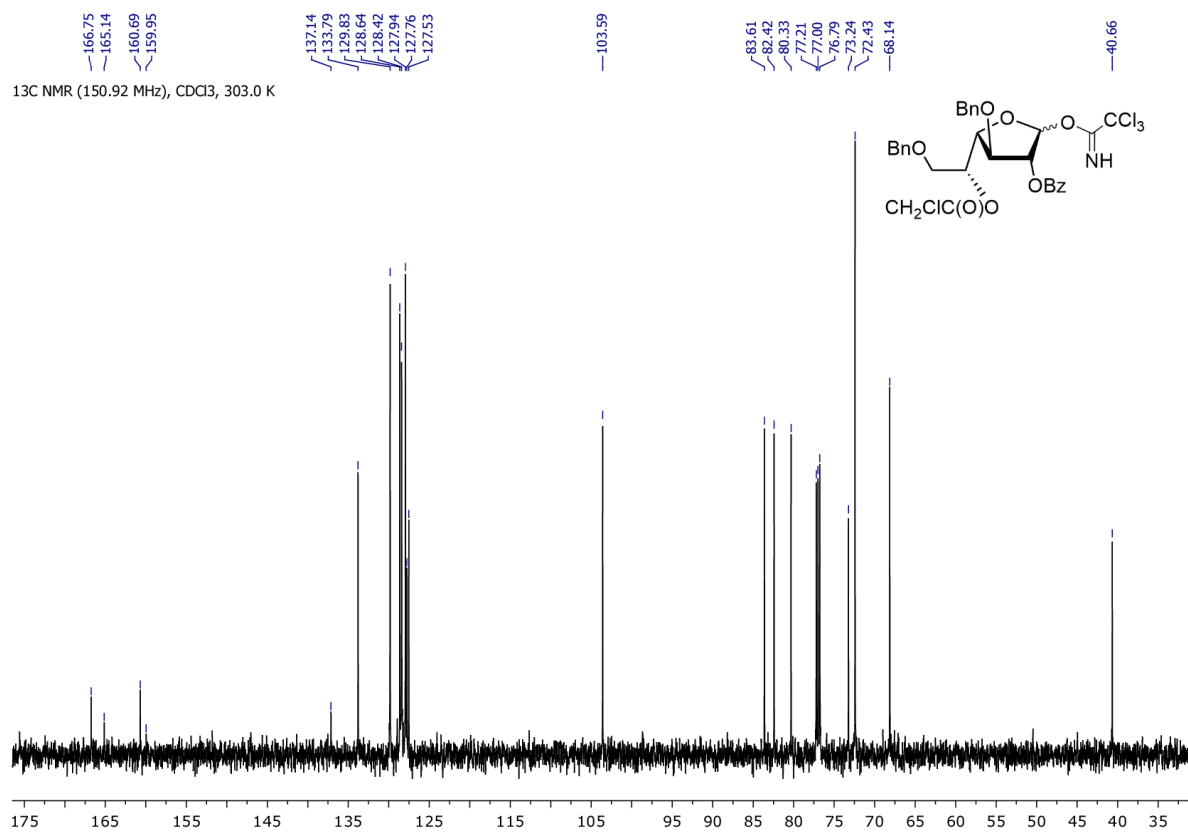

**Acquisition Parameter**

|             |            |                      |          |                  |           |
|-------------|------------|----------------------|----------|------------------|-----------|
| Source Type | ESI        | Ion Polarity         | Positive | Set Nebulizer    | 0.4 Bar   |
| Focus       | Not active |                      |          | Set Dry Heater   | 180 °C    |
| Scan Begin  | 50 m/z     | Set Capillary        | 4500 V   | Set Dry Gas      | 4.0 l/min |
| Scan End    | 3000 m/z   | Set End Plate Offset | -500 V   | Set Divert Valve | Waste     |

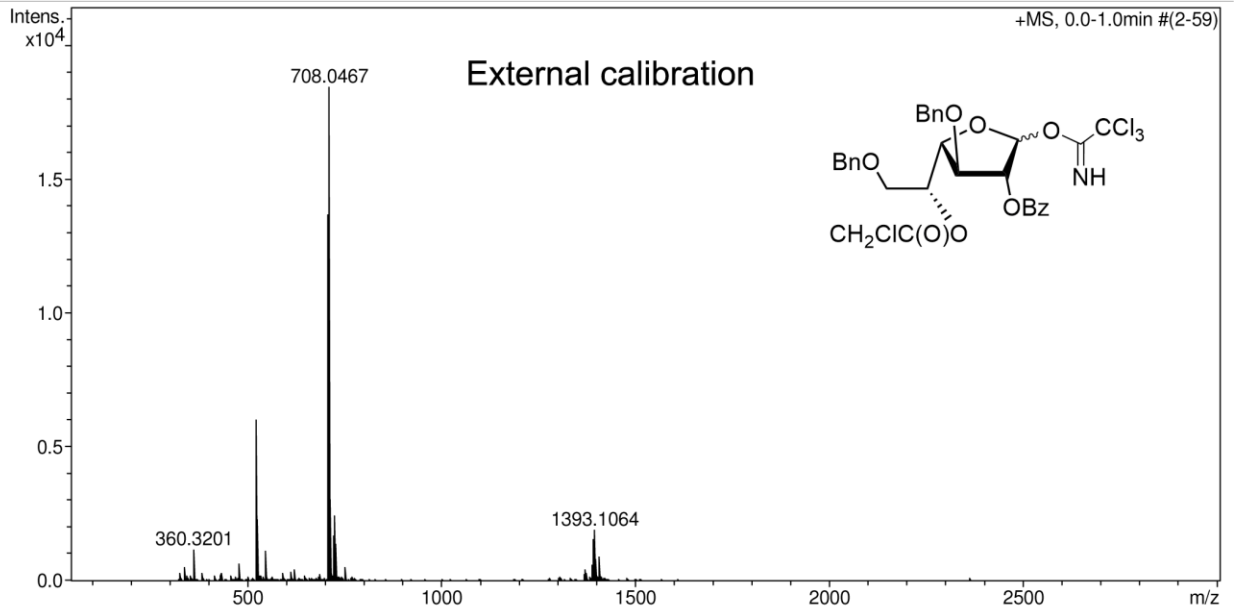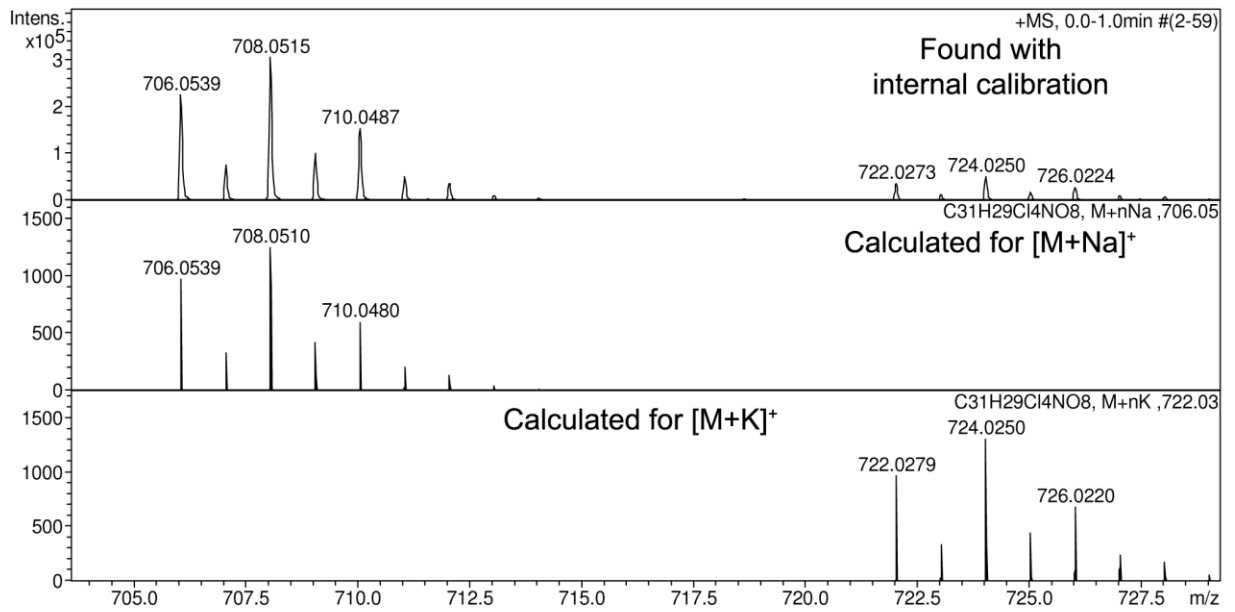

**Allyl 2-O-benzoyl-3,6-di-O-benzyl-5-O-chloroacetyl-β-D-galactofuranosyl-(1→5)-2-O-benzoyl-3,6-di-O-benzyl-β-D-galactofuranoside (18)**

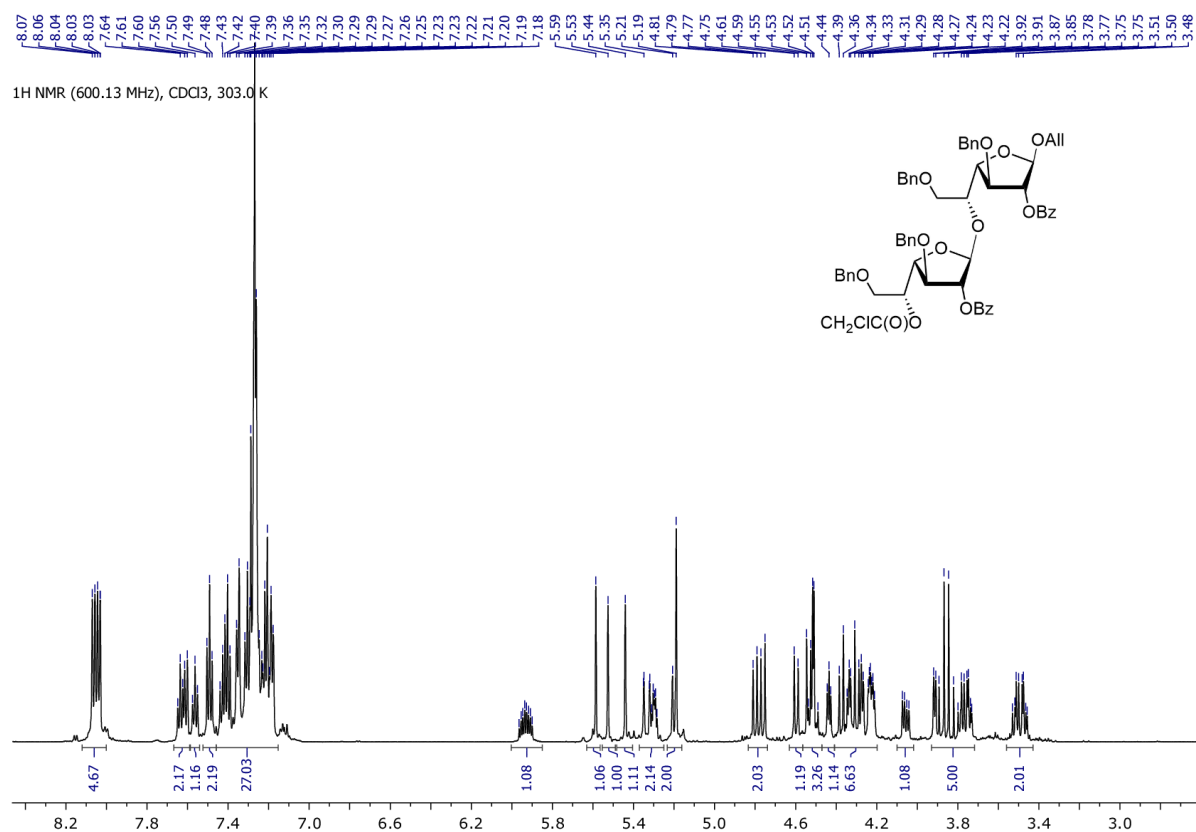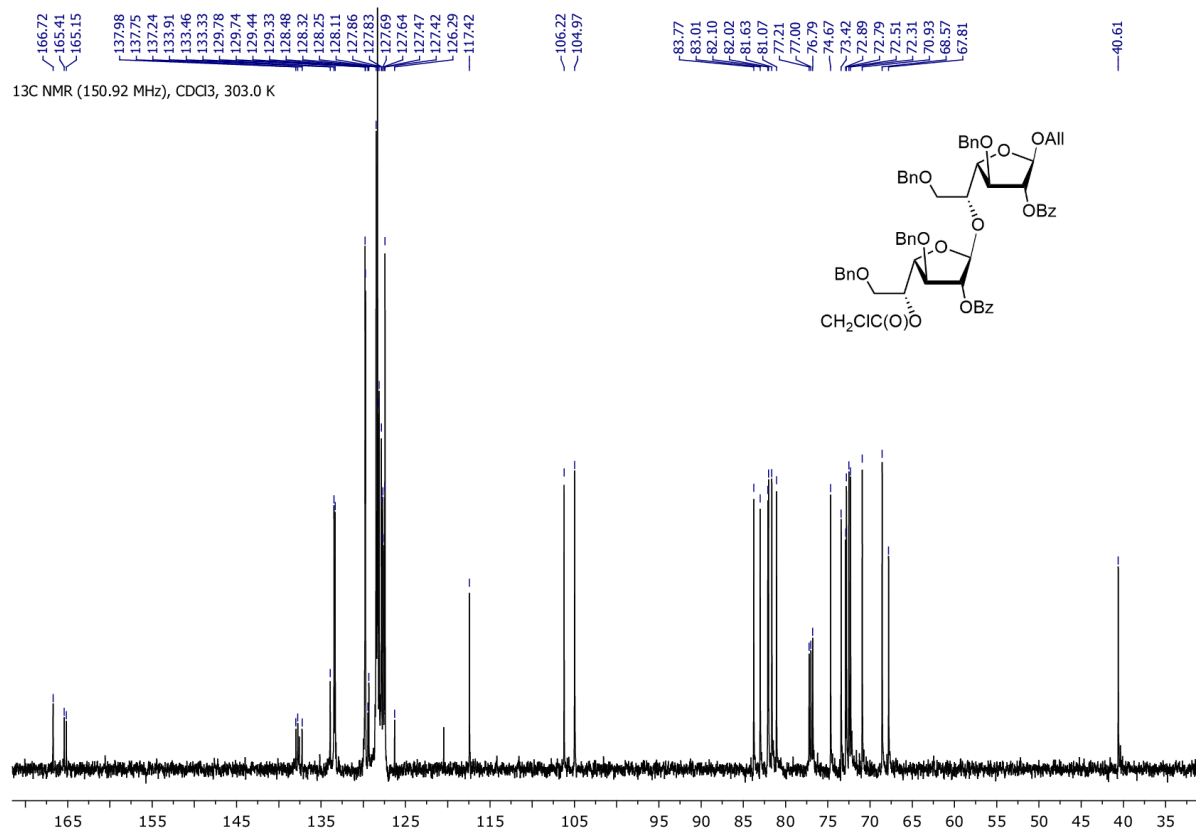

**Acquisition Parameter**

|             |          |                       |            |                  |           |
|-------------|----------|-----------------------|------------|------------------|-----------|
| Source Type | ESI      | Ion Polarity          | Positive   | Set Nebulizer    | 0.4 Bar   |
| Focus       | Active   | Set Capillary         | 4500 V     | Set Dry Heater   | 180 °C    |
| Scan Begin  | 50 m/z   | Set End Plate Offset  | -500 V     | Set Dry Gas      | 4.0 l/min |
| Scan End    | 3000 m/z | Set Collision Cell RF | 1200.0 Vpp | Set Divert Valve | Waste     |

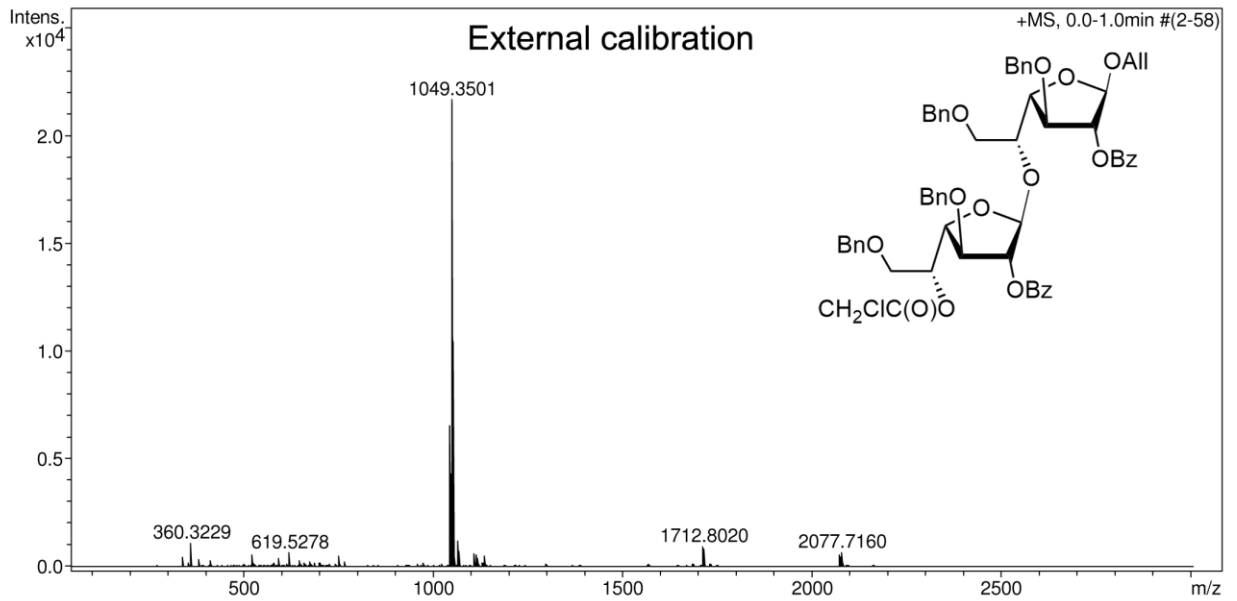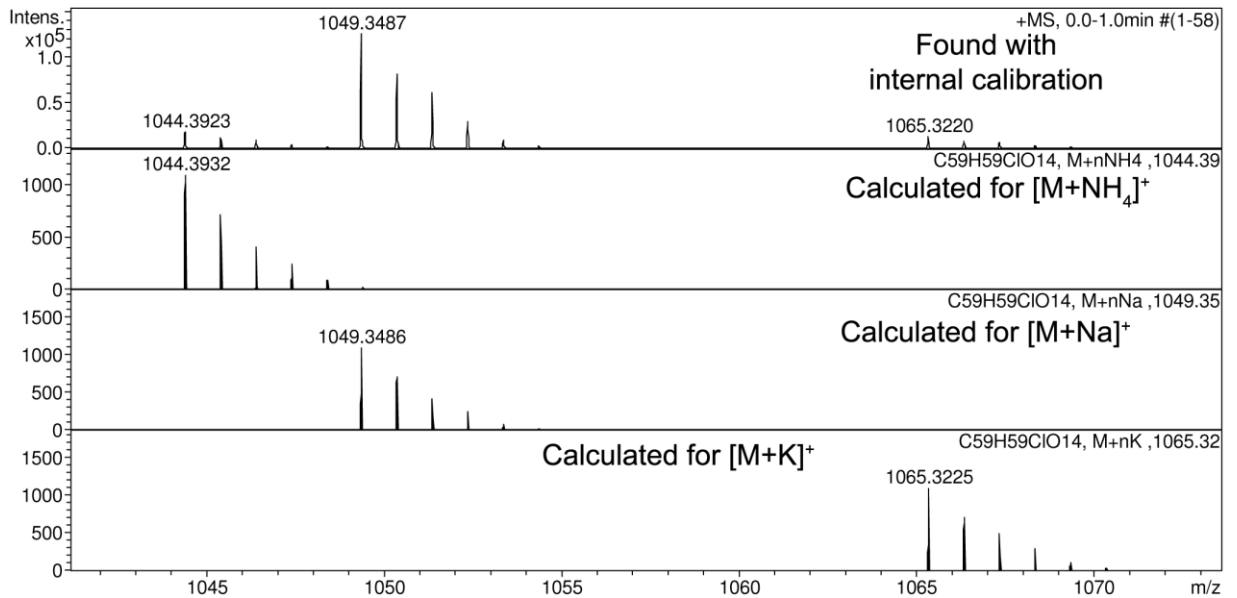



**Acquisition Parameter**

|             |            |                      |          |                  |           |
|-------------|------------|----------------------|----------|------------------|-----------|
| Source Type | ESI        | Ion Polarity         | Positive | Set Nebulizer    | 0.4 Bar   |
| Focus       | Not active |                      |          | Set Dry Heater   | 180 °C    |
| Scan Begin  | 50 m/z     | Set Capillary        | 4500 V   | Set Dry Gas      | 4.0 l/min |
| Scan End    | 3000 m/z   | Set End Plate Offset | -500 V   | Set Divert Valve | Waste     |

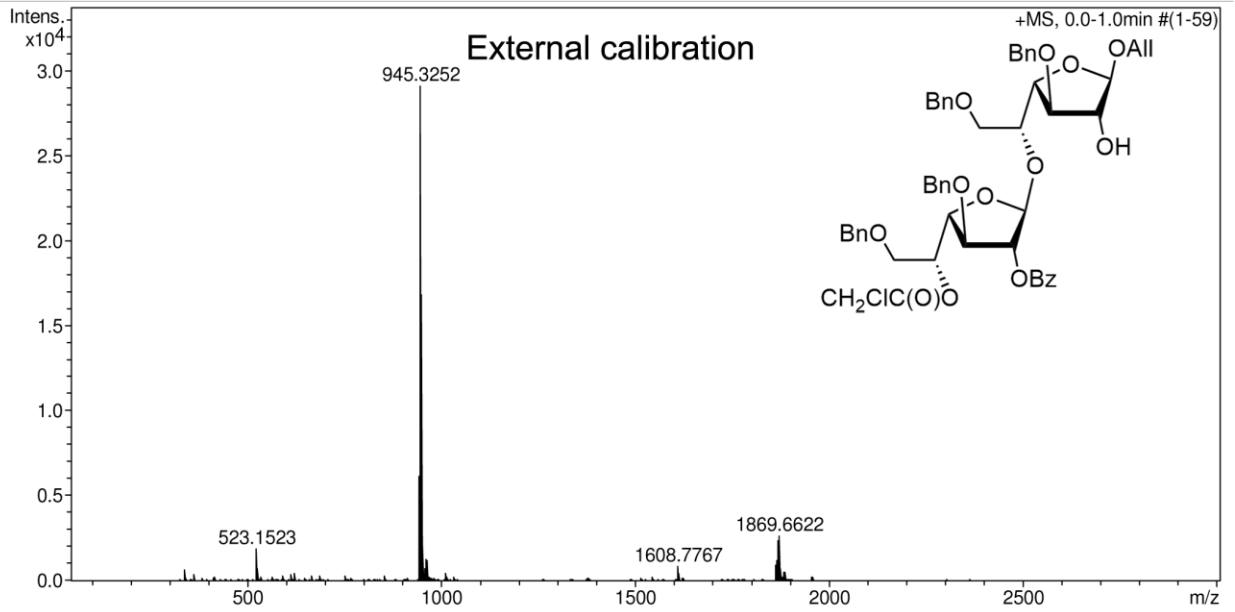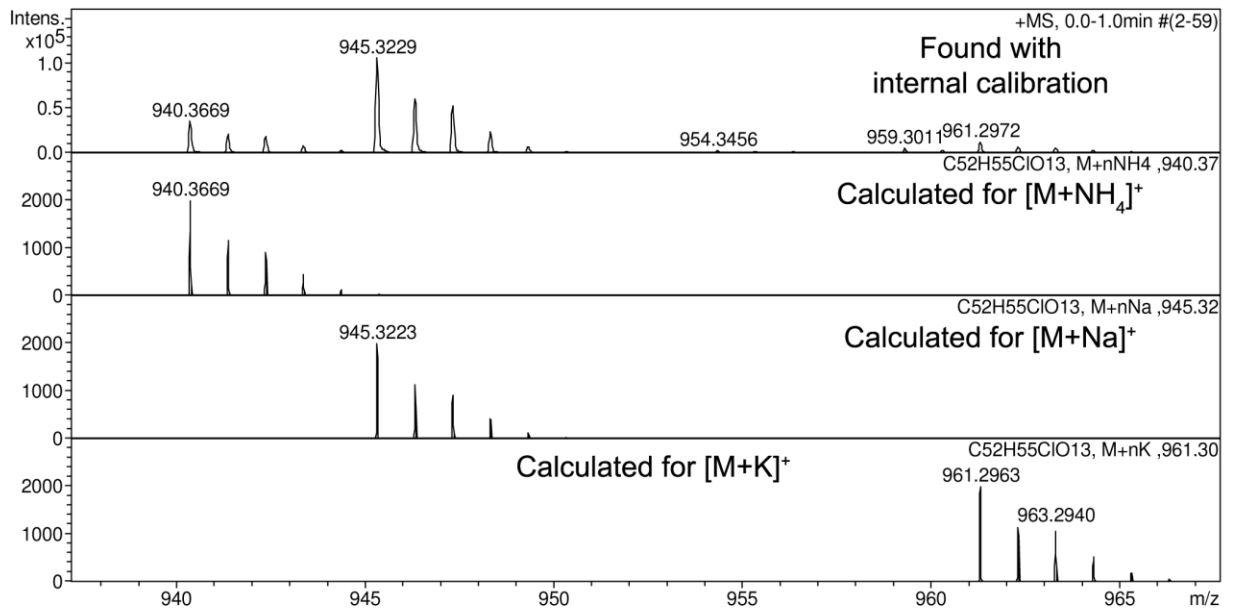

Calculated for  $[M+Na]^+$

C52H55ClO13, M+nNa, 945.32

Calculated for  $[M+K]^+$

C52H55ClO13, M+nK, 961.30

**2-O-benzoyl-3,6-di-O-benzyl-5-O-chloroacetyl-β-D-galactofuranosyl-(1→5)-2-O-benzoyl-3,6-di-O-benzyl-β-D-galactofuranoside trichloroacetimidate (5)**

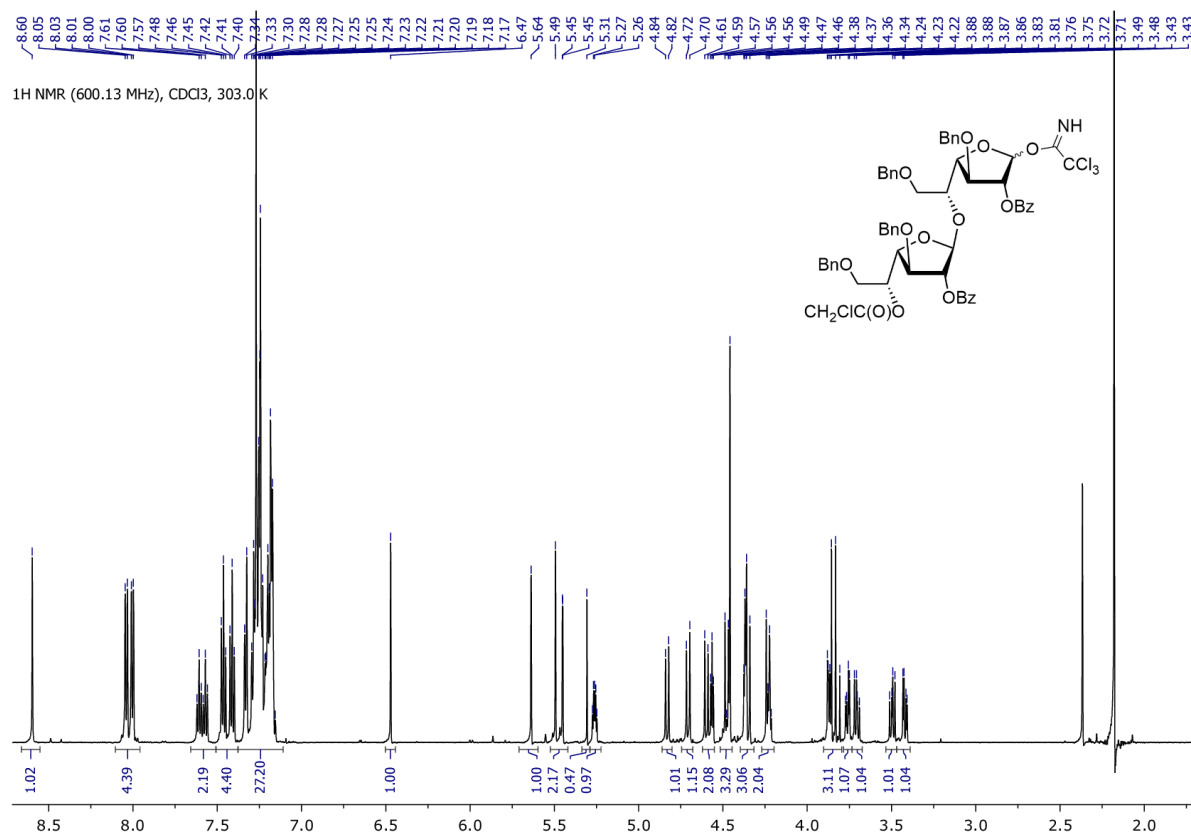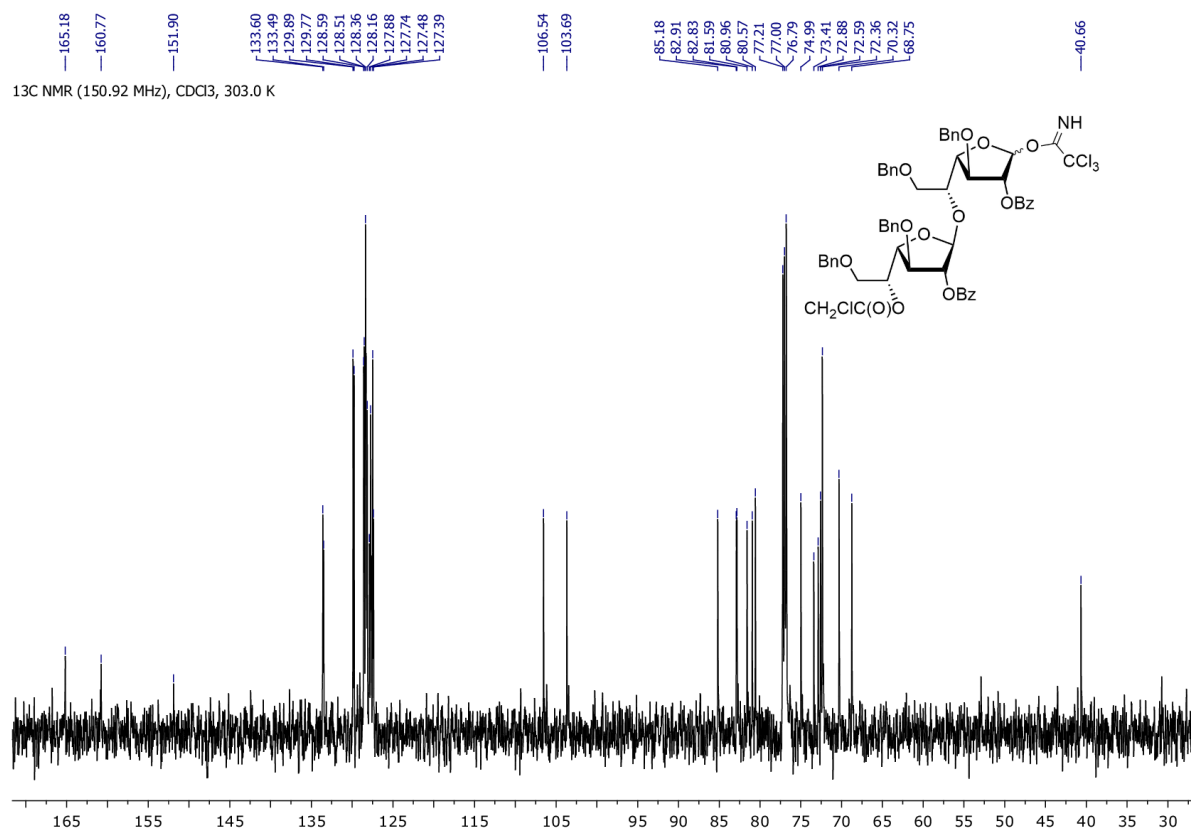





**Allyl 2,3,5,6-tetra-O-benzoyl-β-D-galactofuranosyl-(1→5)-3,6-di-O-benzyl-β-D-galactofuranoside (21)**

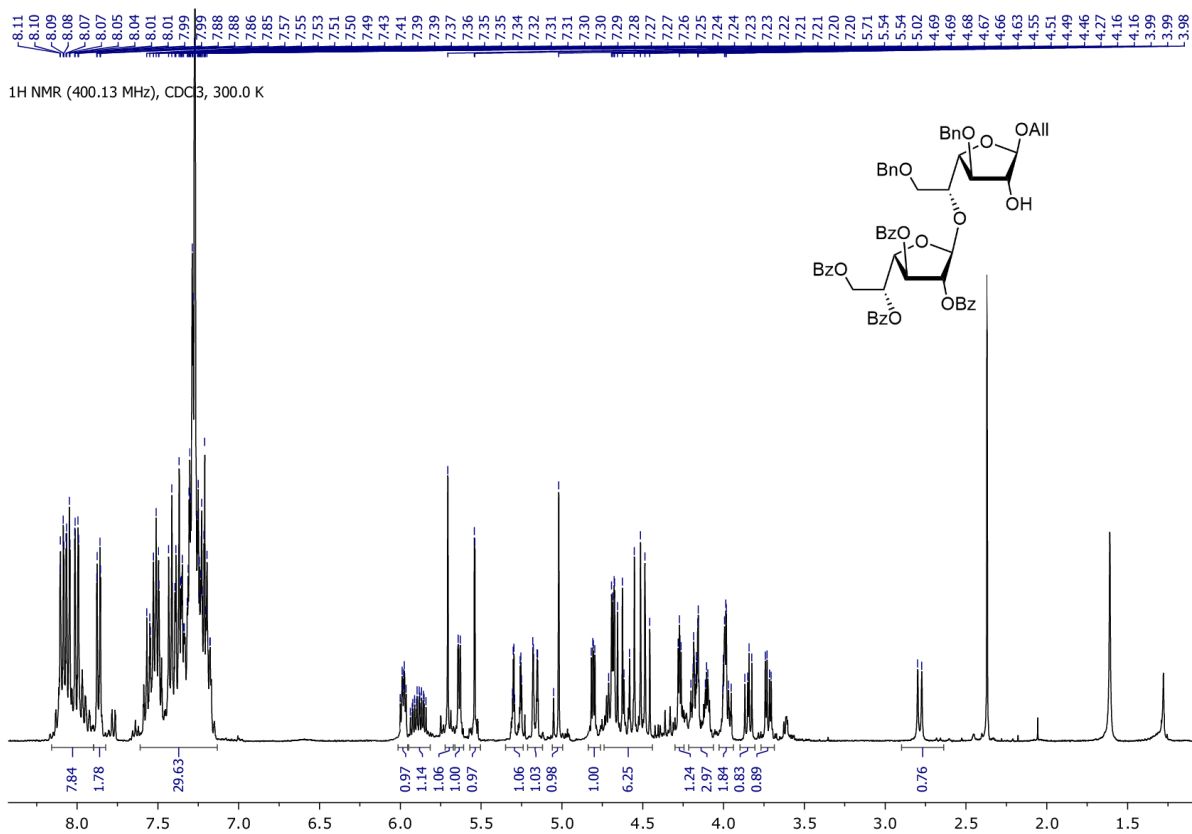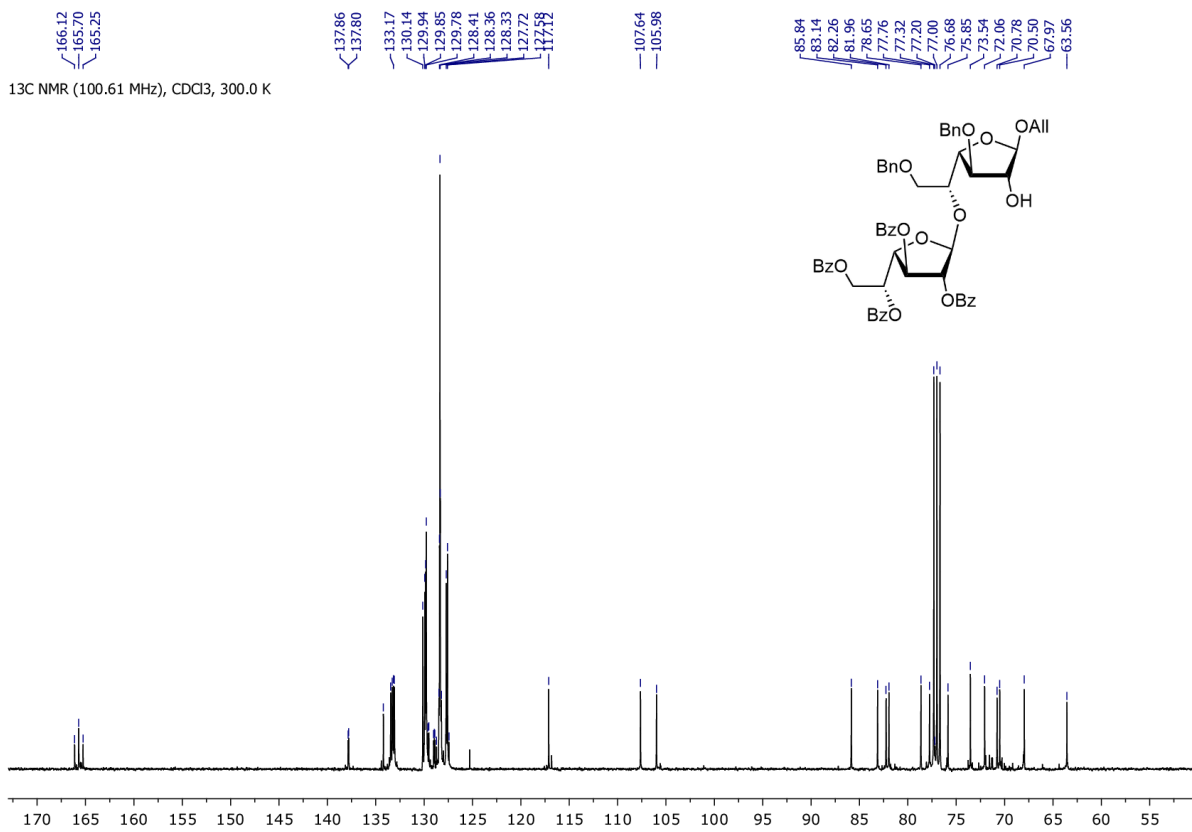

**Acquisition Parameter**

|             |          |                       |            |                  |           |
|-------------|----------|-----------------------|------------|------------------|-----------|
| Source Type | ESI      | Ion Polarity          | Positive   | Set Nebulizer    | 0.4 Bar   |
| Focus       | Active   | Set Capillary         | 4500 V     | Set Dry Heater   | 180 °C    |
| Scan Begin  | 50 m/z   | Set End Plate Offset  | -500 V     | Set Dry Gas      | 4.0 l/min |
| Scan End    | 3000 m/z | Set Collision Cell RF | 1200.0 Vpp | Set Divert Valve | Waste     |

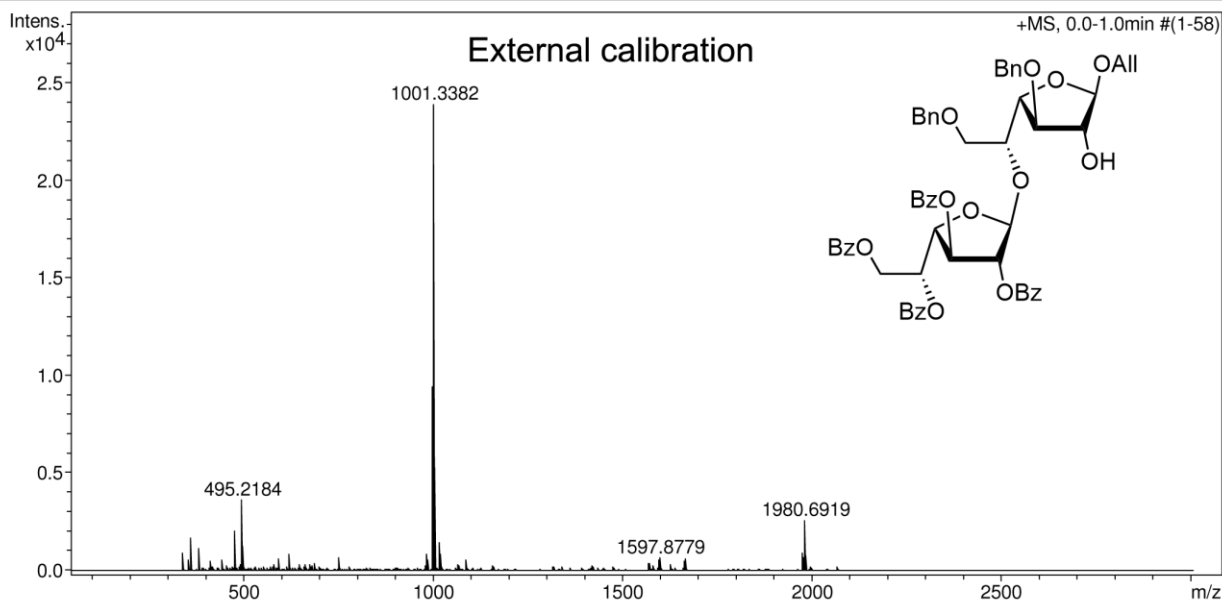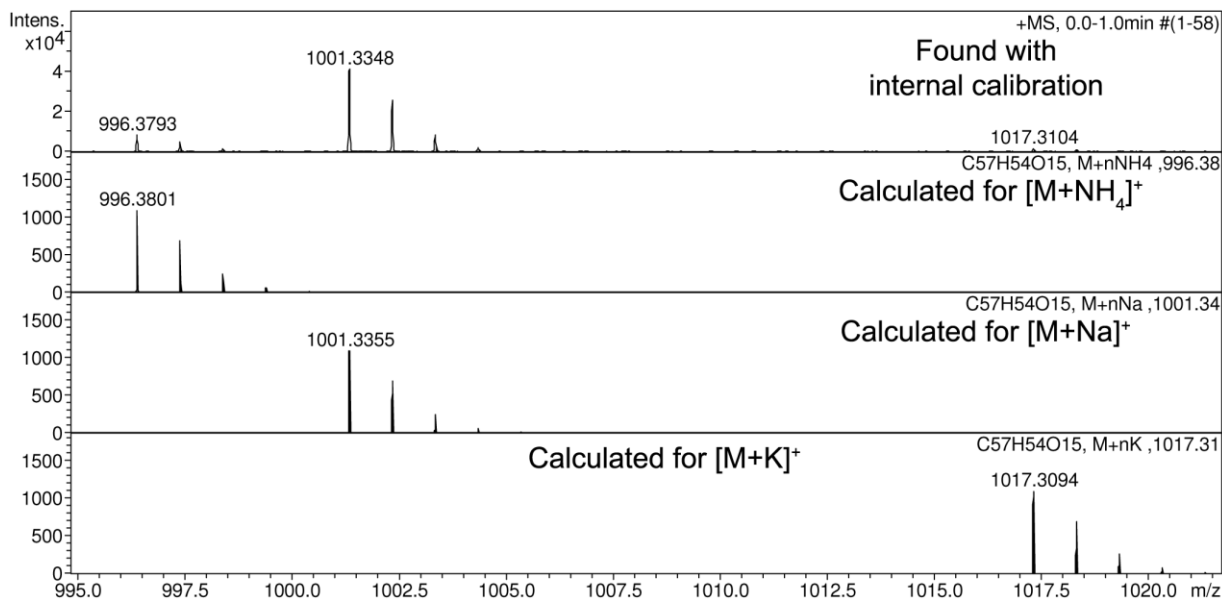

# Allyl 2,3,5,6-tetra-O-benzoyl-β-D-galactofuranosyl-(1→5)-2-O-benzoyl-3,6-di-O-benzyl-β-D-galactofuranoside (22)

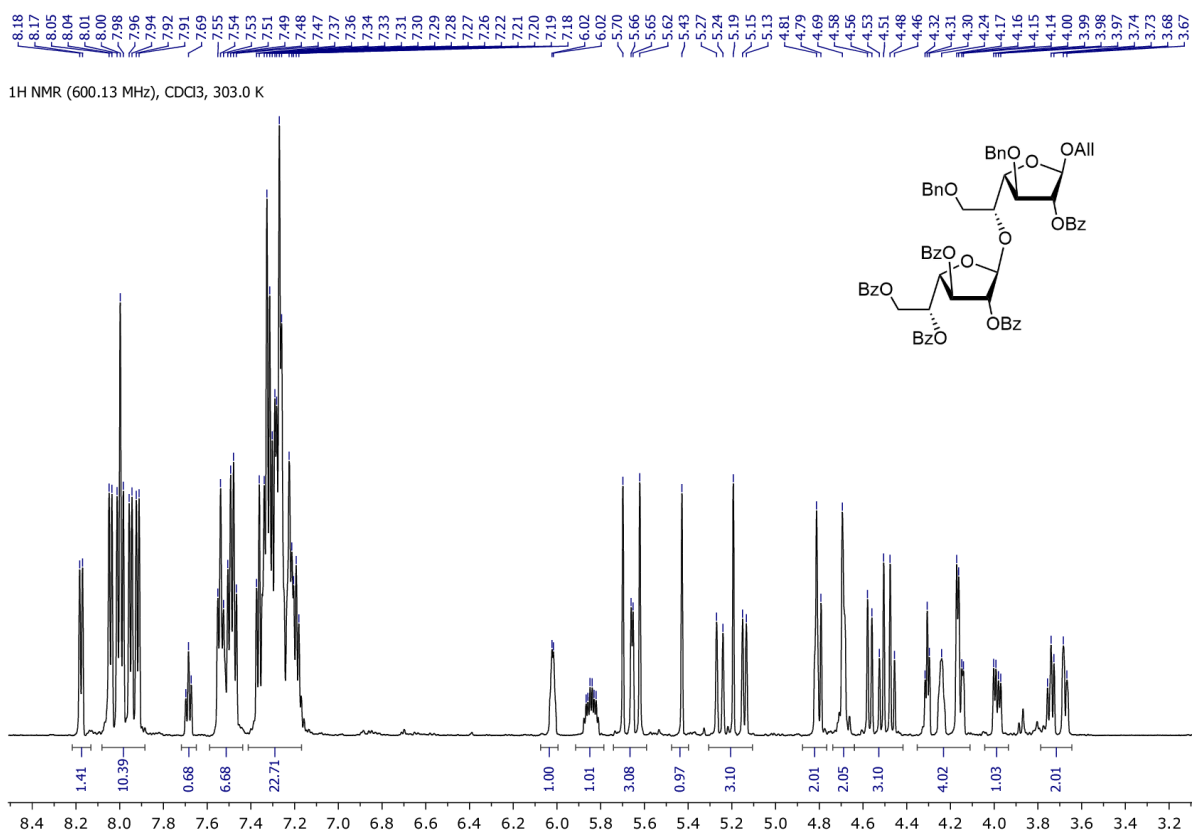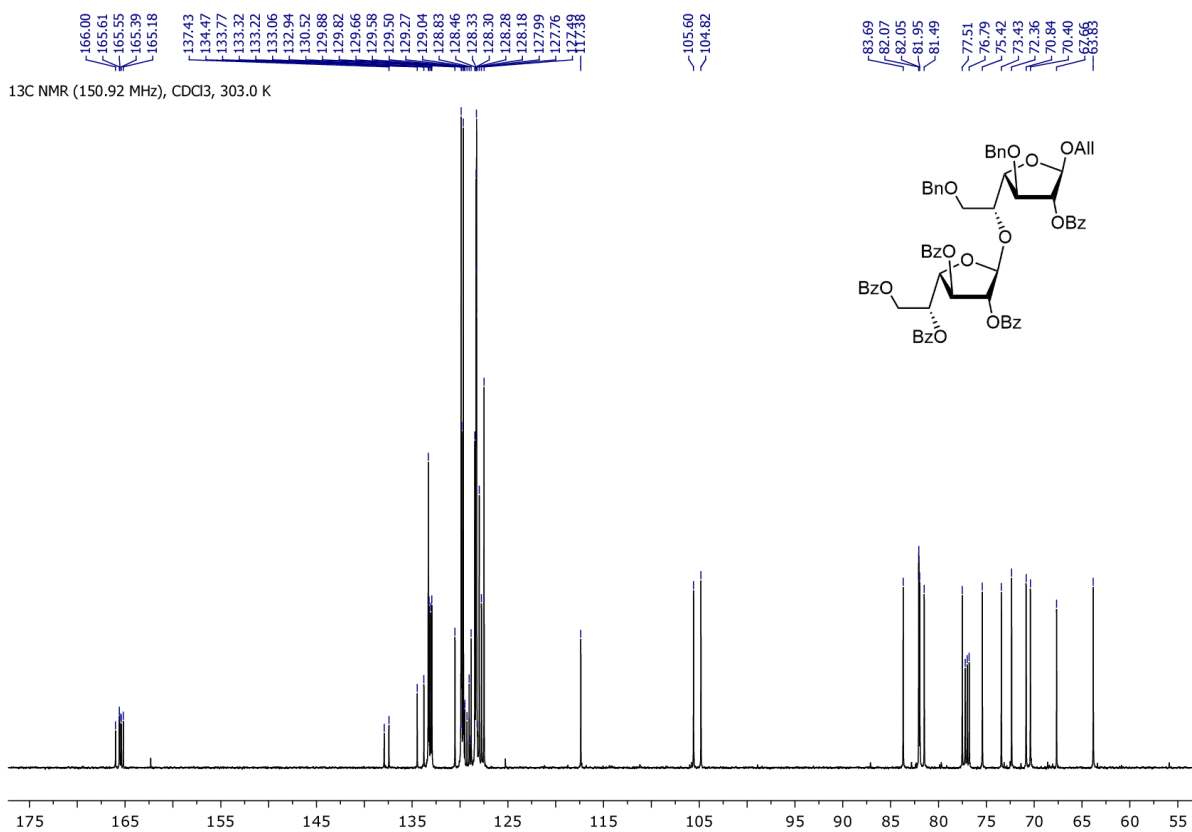

**Acquisition Parameter**

|             |            |                      |          |                  |           |
|-------------|------------|----------------------|----------|------------------|-----------|
| Source Type | ESI        | Ion Polarity         | Positive | Set Nebulizer    | 0.4 Bar   |
| Focus       | Not active |                      |          | Set Dry Heater   | 180 °C    |
| Scan Begin  | 50 m/z     | Set Capillary        | 4500 V   | Set Dry Gas      | 4.0 l/min |
| Scan End    | 3000 m/z   | Set End Plate Offset | -500 V   | Set Divert Valve | Waste     |

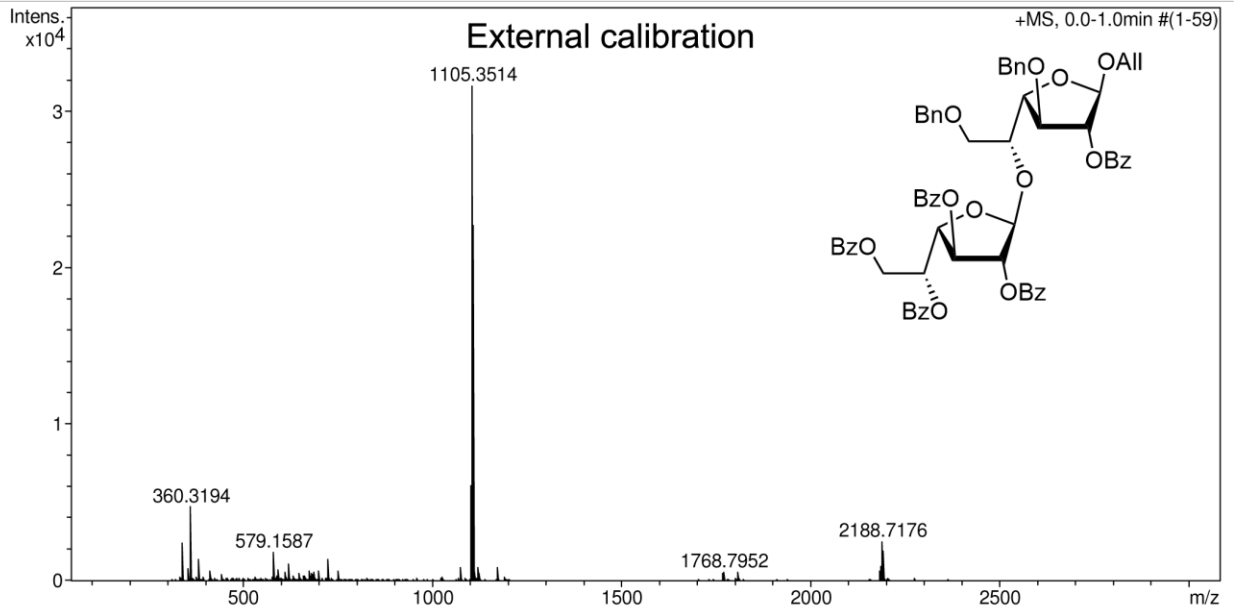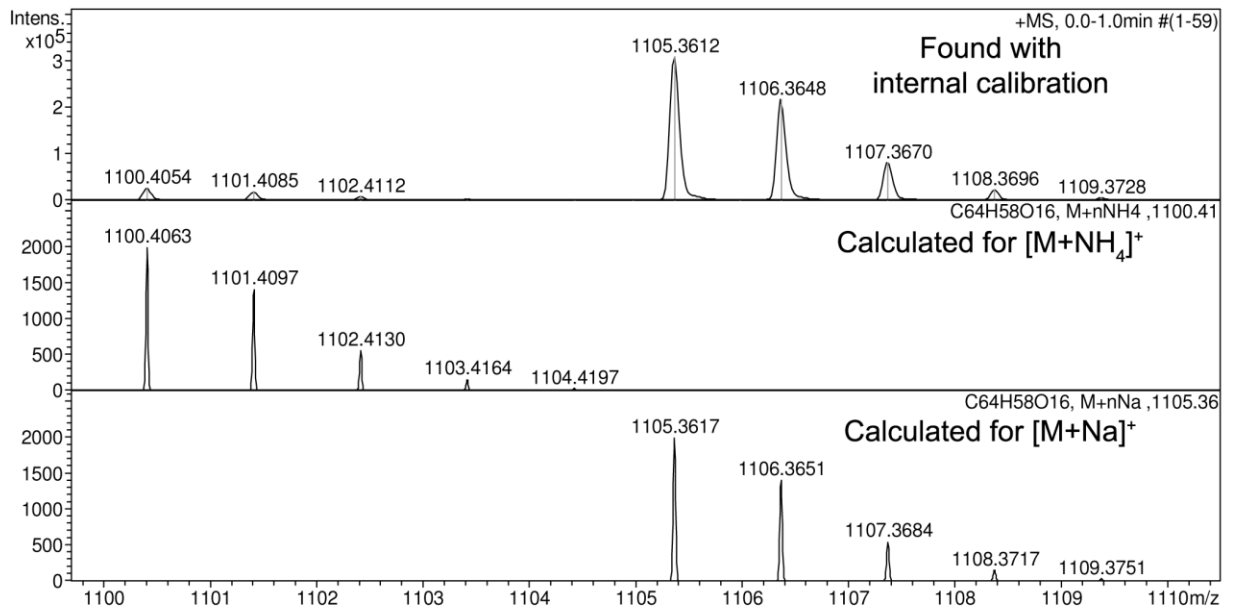

## 2,3,5,6-tetra-O-benzoyl-β-D-galactofuranosyl-(1→5)-2-O-benzoyl-3,6-di-O-benzyl-β-D-galactofuranoside trichloroacetimidate (6)

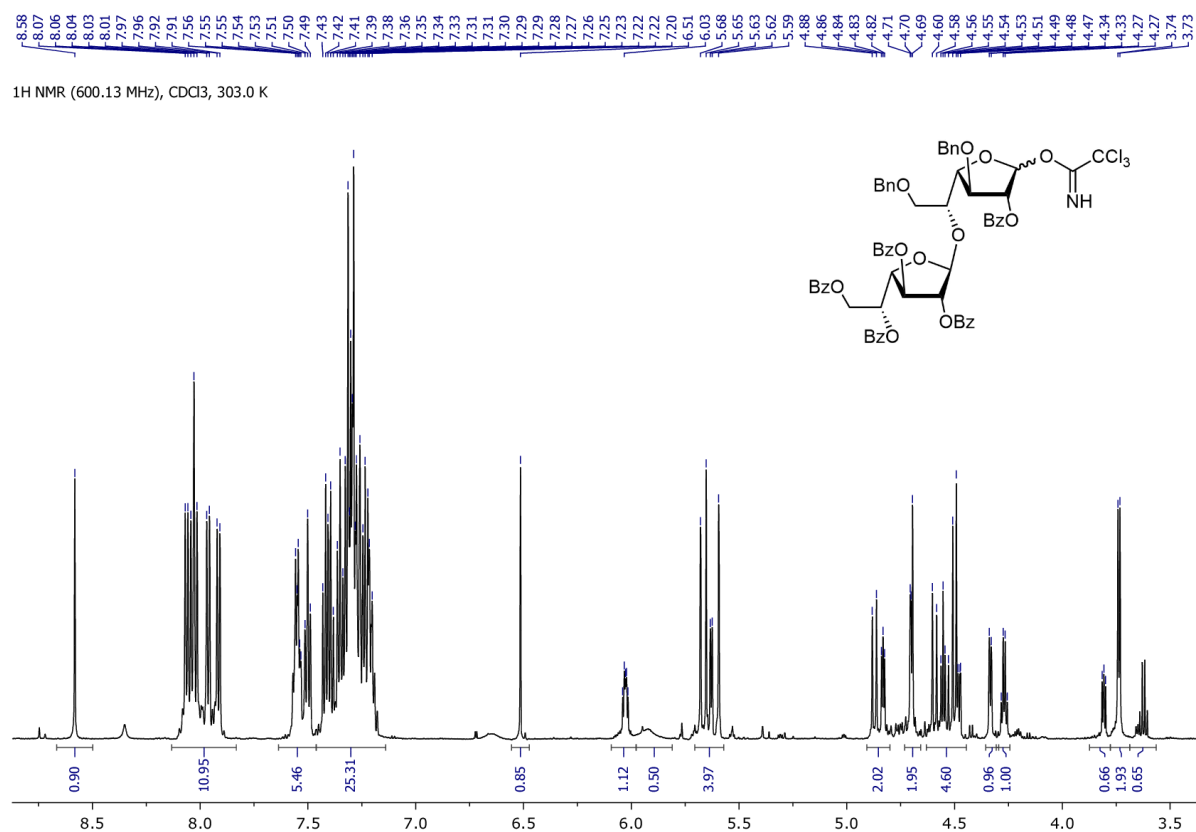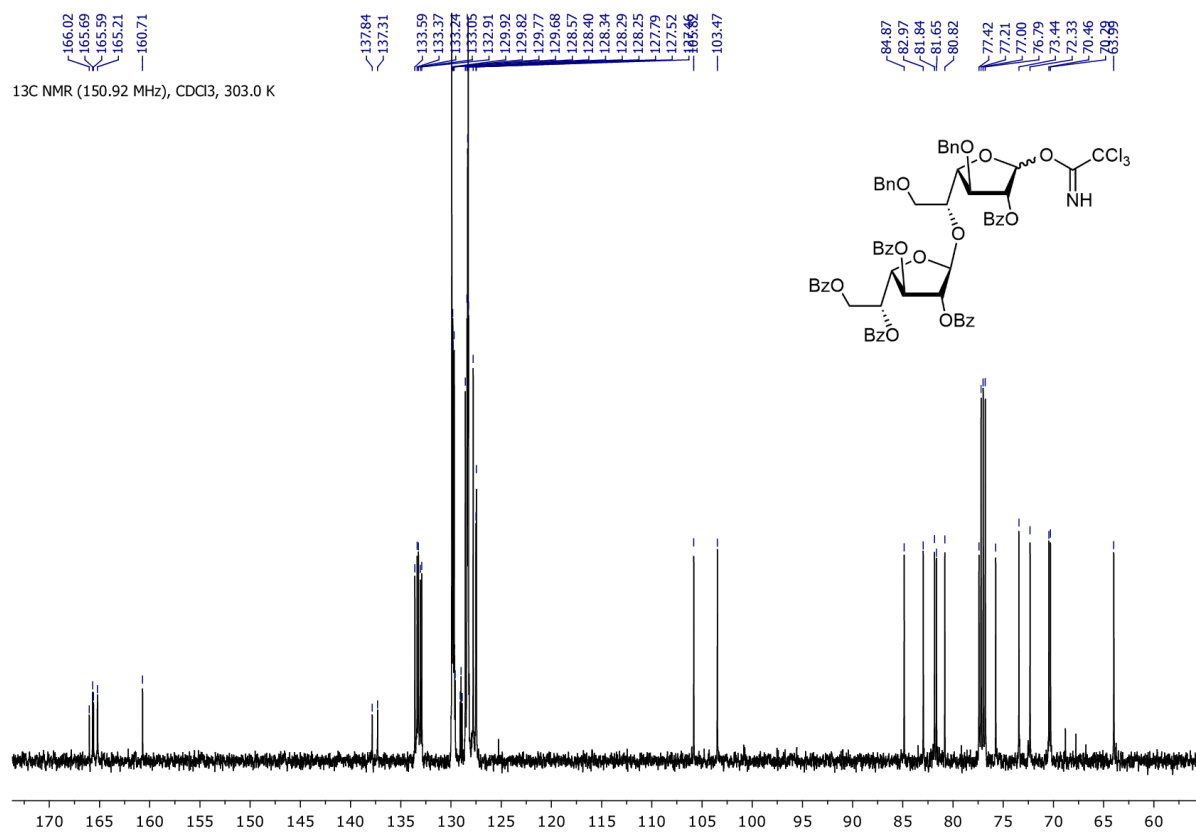

**Acquisition Parameter**

|             |          |                       |            |                  |           |
|-------------|----------|-----------------------|------------|------------------|-----------|
| Source Type | ESI      | Ion Polarity          | Positive   | Set Nebulizer    | 0.4 Bar   |
| Focus       | Active   | Set Capillary         | 4500 V     | Set Dry Heater   | 180 °C    |
| Scan Begin  | 50 m/z   | Set End Plate Offset  | -500 V     | Set Dry Gas      | 4.0 l/min |
| Scan End    | 3000 m/z | Set Collision Cell RF | 1200.0 Vpp | Set Divert Valve | Waste     |

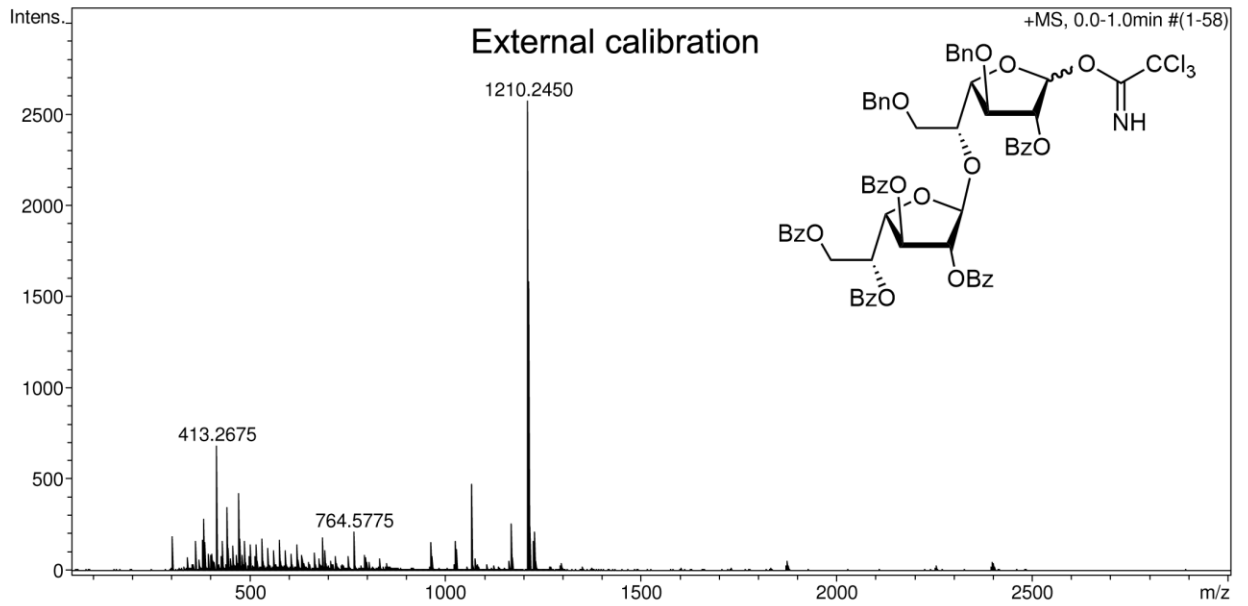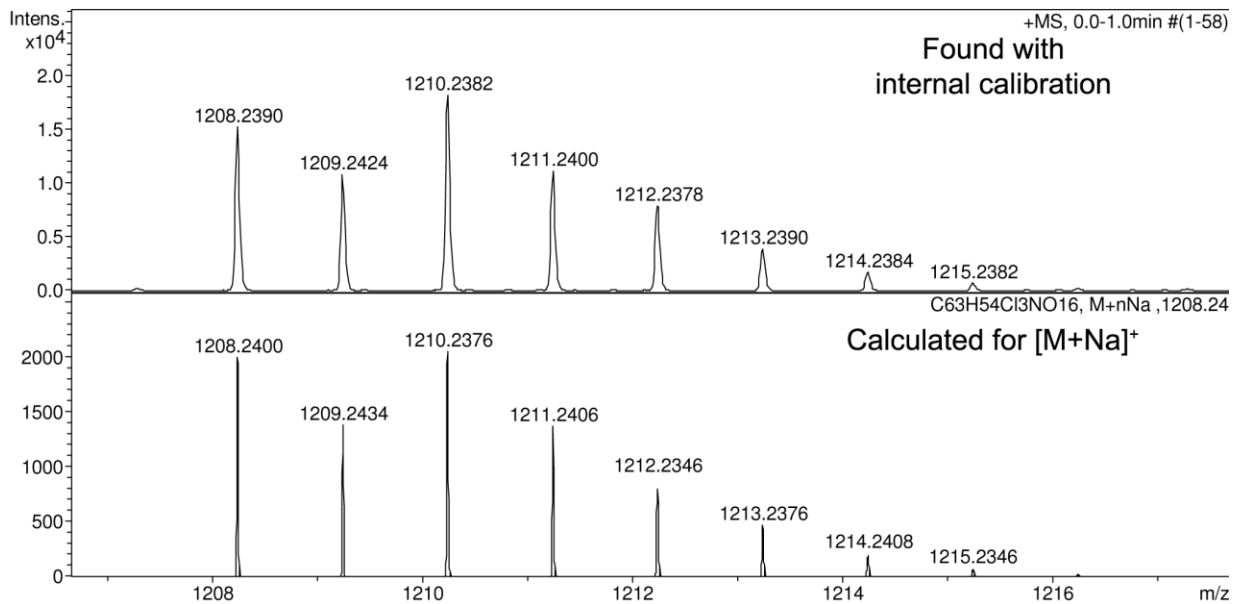

### 3-trifluoroacetamidopropyl 2,3,4-tri-O-benzoyl- $\alpha$ -D-mannopyranoside (3)

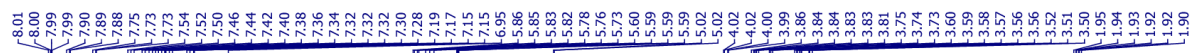

$^1\text{H}$  NMR (400.13 MHz),  $\text{CDCl}_3$ , 300.0 K

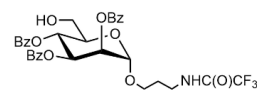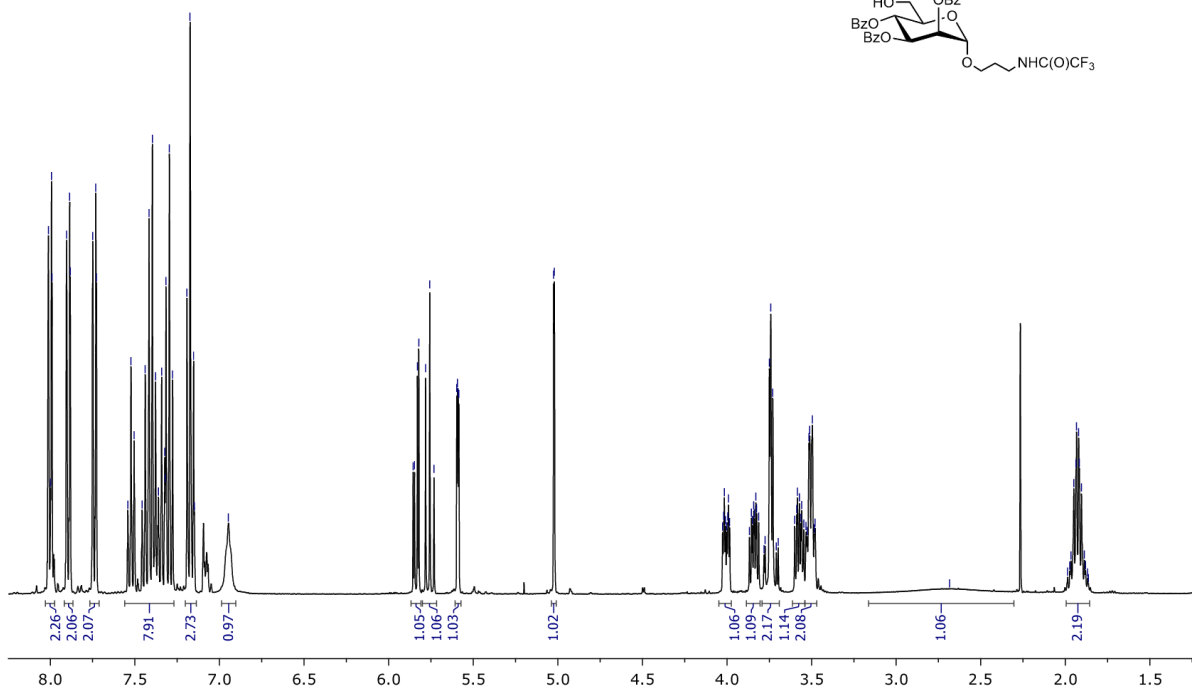

$^{13}\text{C}$  NMR (100.61 MHz),  $\text{CDCl}_3$ , 300.0 K

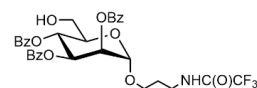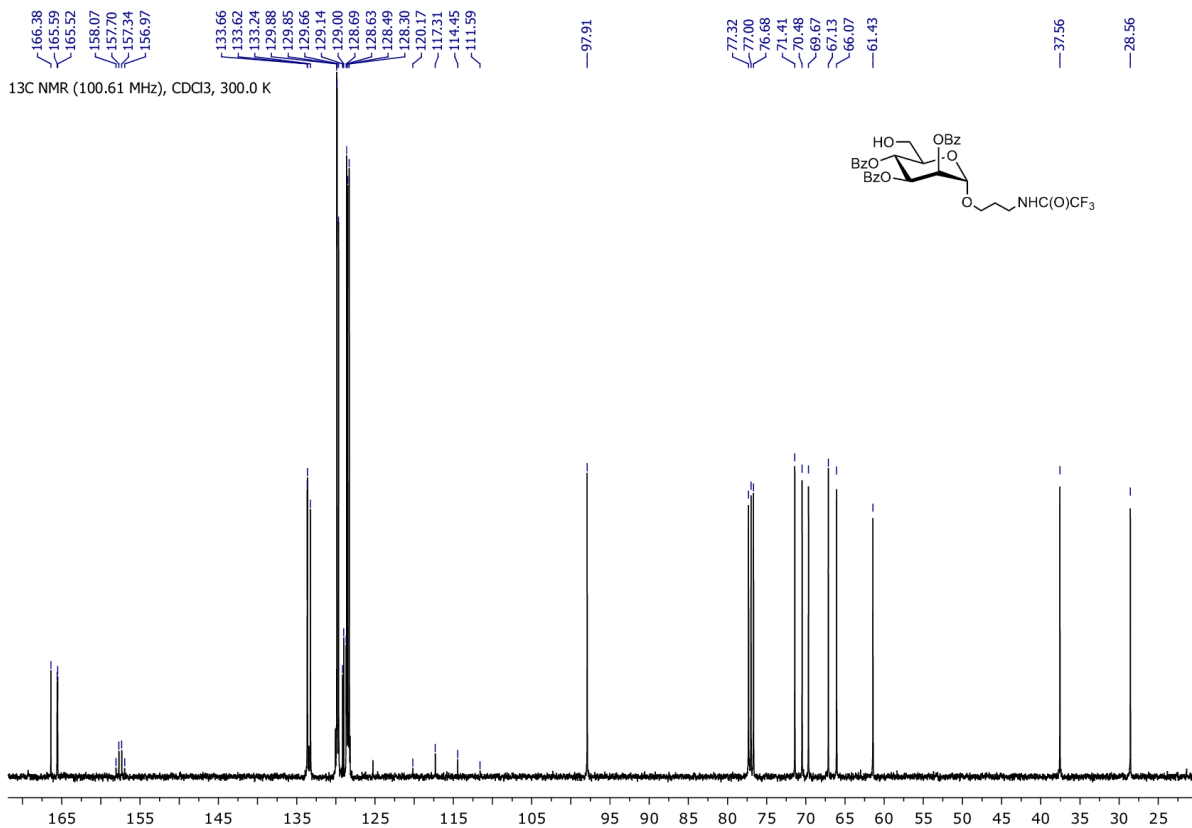

**Acquisition Parameter**

|             |          |                       |            |                  |           |
|-------------|----------|-----------------------|------------|------------------|-----------|
| Source Type | ESI      | Ion Polarity          | Positive   | Set Nebulizer    | 0.4 Bar   |
| Focus       | Active   | Set Capillary         | 4500 V     | Set Dry Heater   | 180 °C    |
| Scan Begin  | 50 m/z   | Set End Plate Offset  | -500 V     | Set Dry Gas      | 4.0 l/min |
| Scan End    | 3000 m/z | Set Collision Cell RF | 1200.0 Vpp | Set Divert Valve | Waste     |

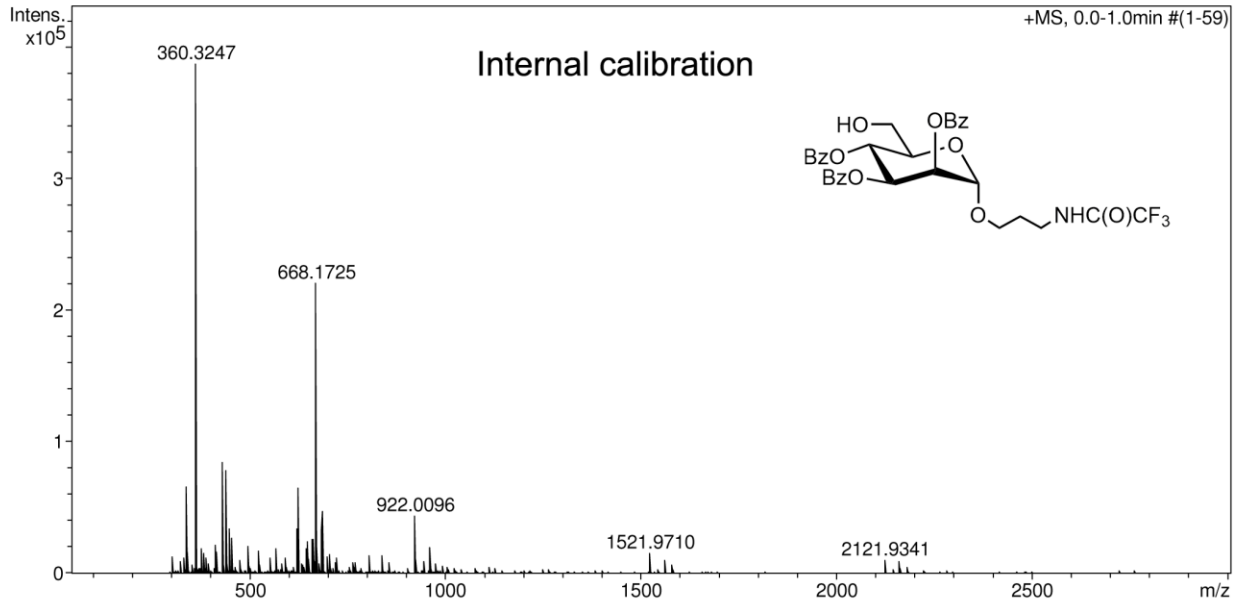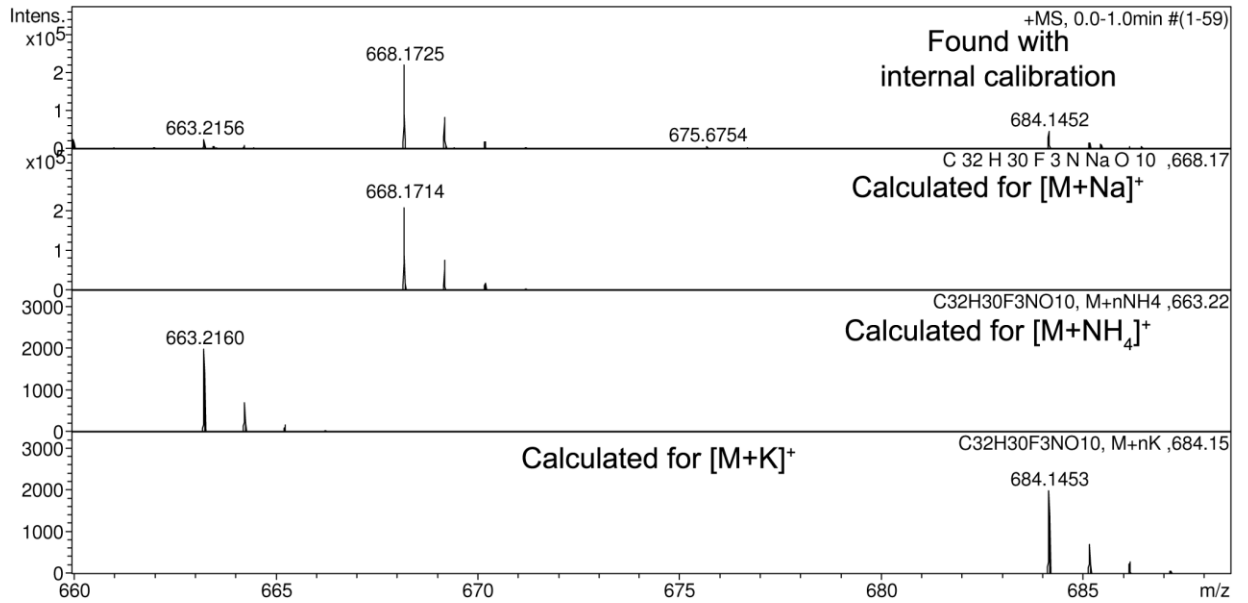



# 3-trifluoroacetamidopropyl 2-O-benzoyl-4,5-di-O-benzyl- $\alpha$ -D-mannopyranoside (4)

<sup>1</sup>H NMR (600.13 MHz), CDCl<sub>3</sub>, 303.0 K

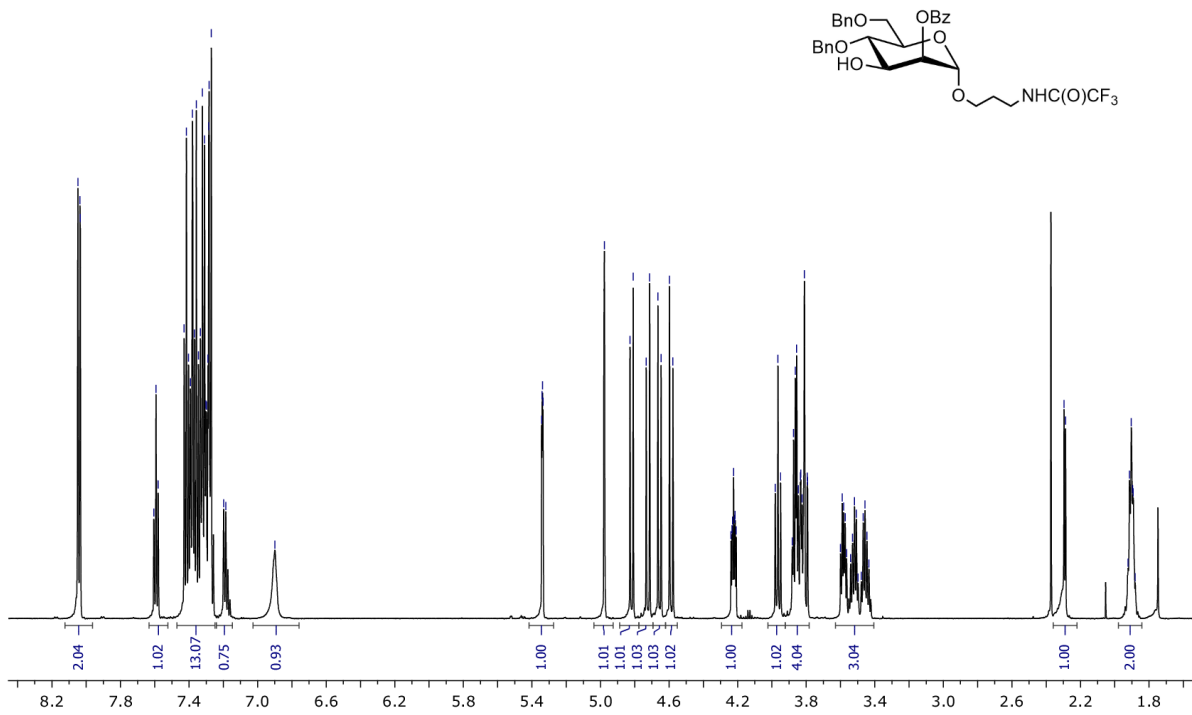

<sup>13</sup>C NMR (150.92 MHz), CDCl<sub>3</sub>, 303.2 K

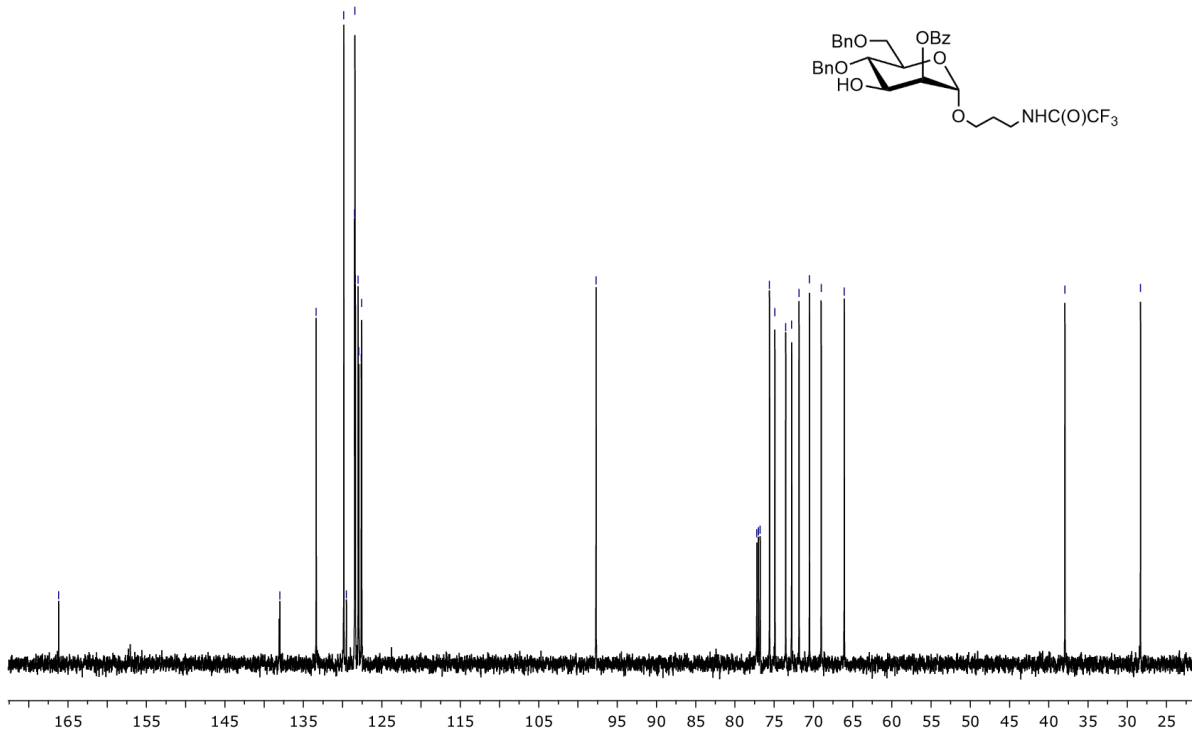

**Acquisition Parameter**

|             |            |                      |          |                  |           |
|-------------|------------|----------------------|----------|------------------|-----------|
| Source Type | ESI        | Ion Polarity         | Positive | Set Nebulizer    | 0.4 Bar   |
| Focus       | Not active |                      |          | Set Dry Heater   | 180 °C    |
| Scan Begin  | 50 m/z     | Set Capillary        | 4500 V   | Set Dry Gas      | 4.0 l/min |
| Scan End    | 3000 m/z   | Set End Plate Offset | -500 V   | Set Divert Valve | Waste     |

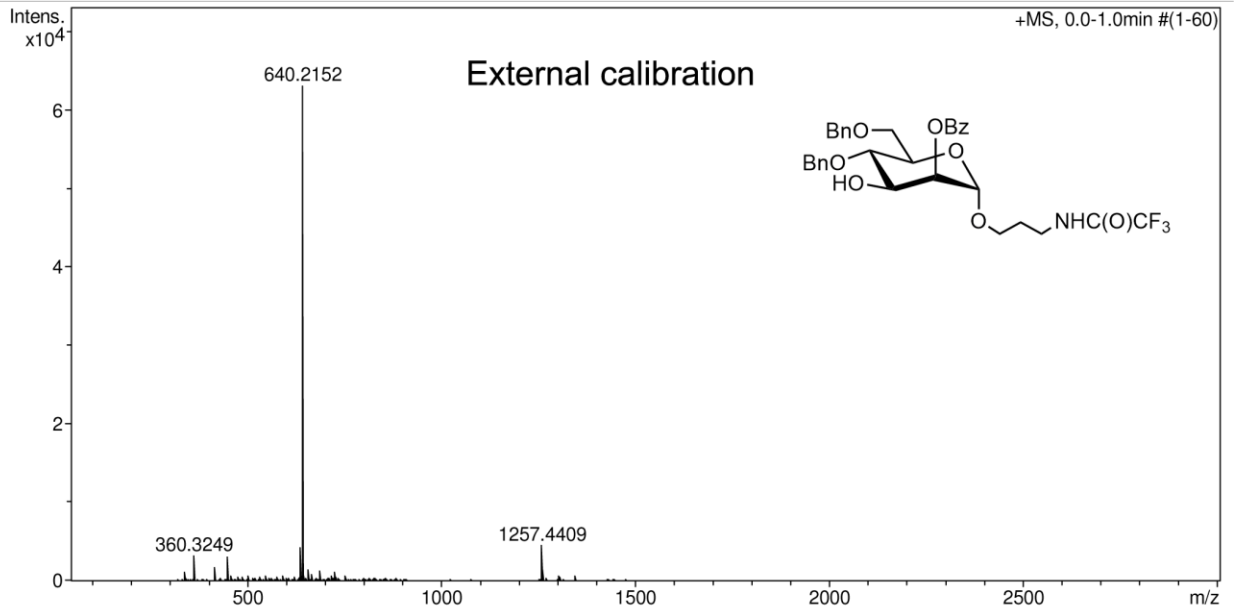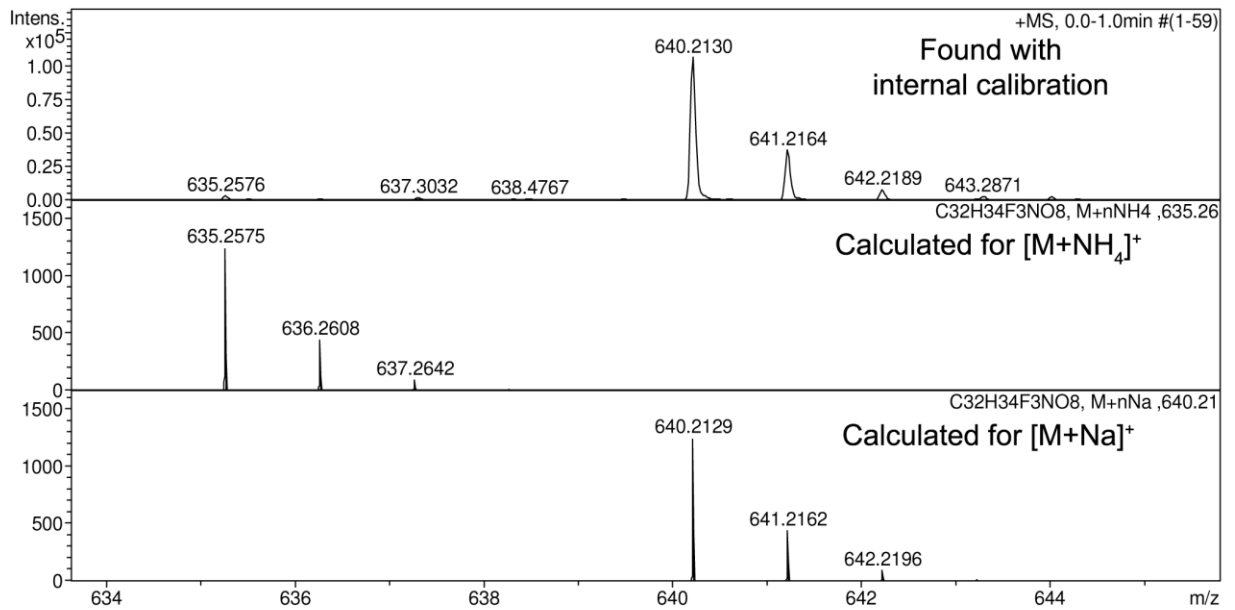



**Acquisition Parameter**

|             |            |                      |          |                  |           |
|-------------|------------|----------------------|----------|------------------|-----------|
| Source Type | ESI        | Ion Polarity         | Positive | Set Nebulizer    | 0.4 Bar   |
| Focus       | Not active |                      |          | Set Dry Heater   | 180 °C    |
| Scan Begin  | 50 m/z     | Set Capillary        | 4500 V   | Set Dry Gas      | 4.0 l/min |
| Scan End    | 3000 m/z   | Set End Plate Offset | -500 V   | Set Divert Valve | Waste     |

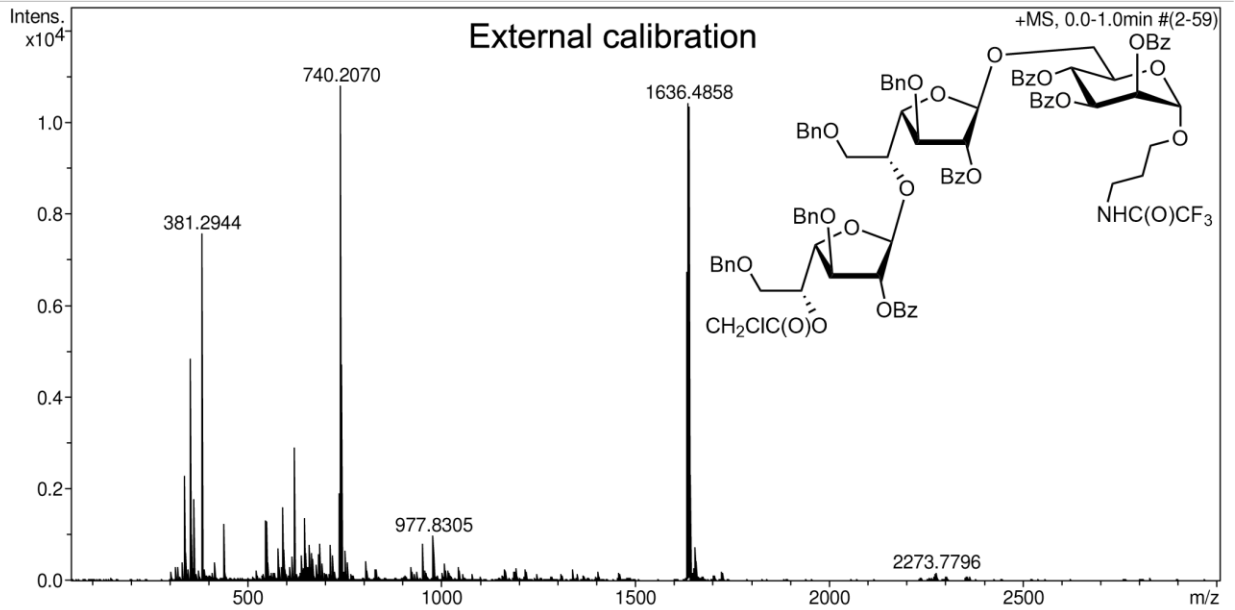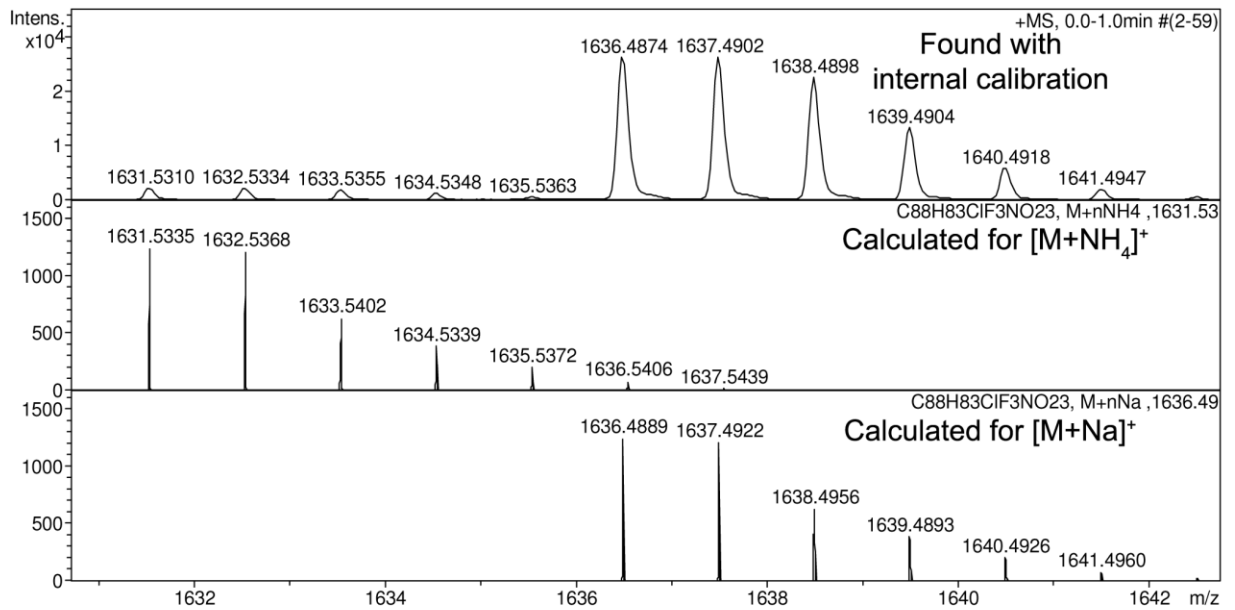

**3-trifluoroacetamidopropyl 2-O-benzoyl-3,6-di-O-benzyl-β-D-galactofuranosyl-(1→5)-2-O-benzoyl-3,6-di-O-benzyl-β-D-galactofuranosyl-(1→6)-2,3,4-tri-O-benzoyl-α-D-mannopyranoside (26)**

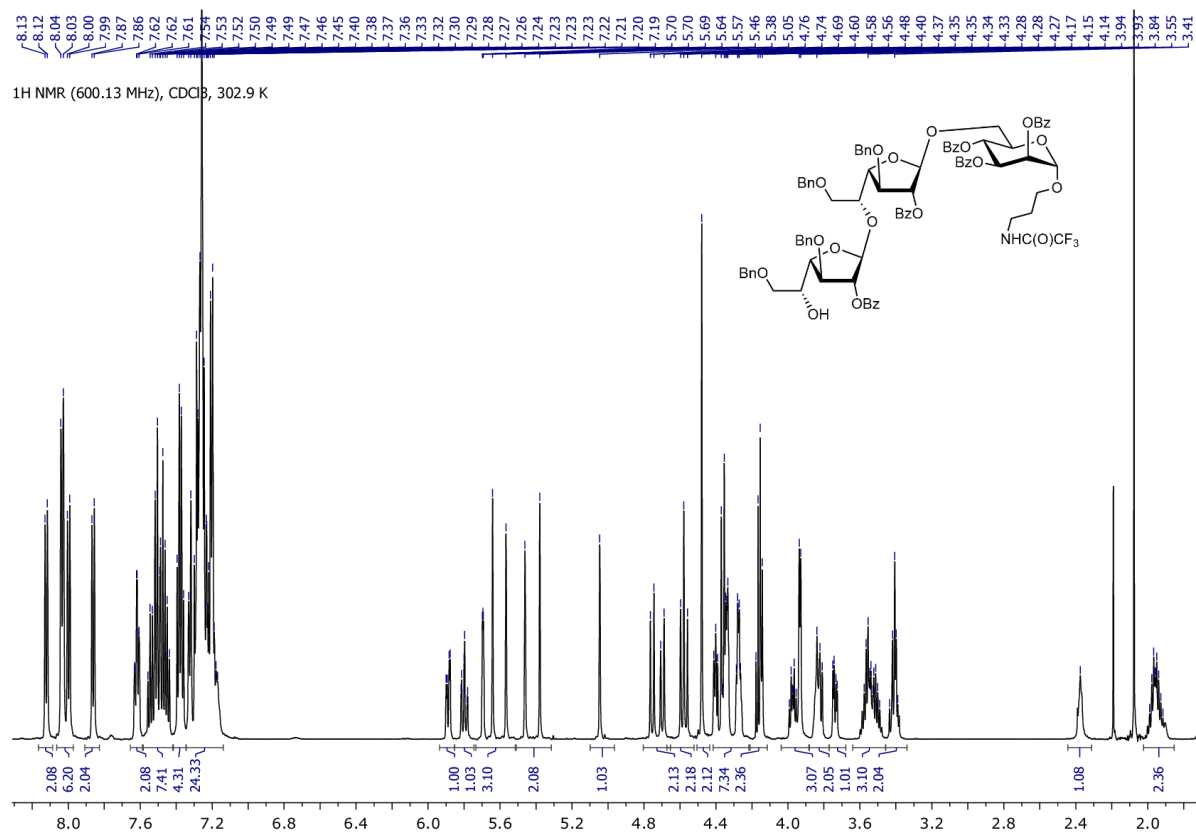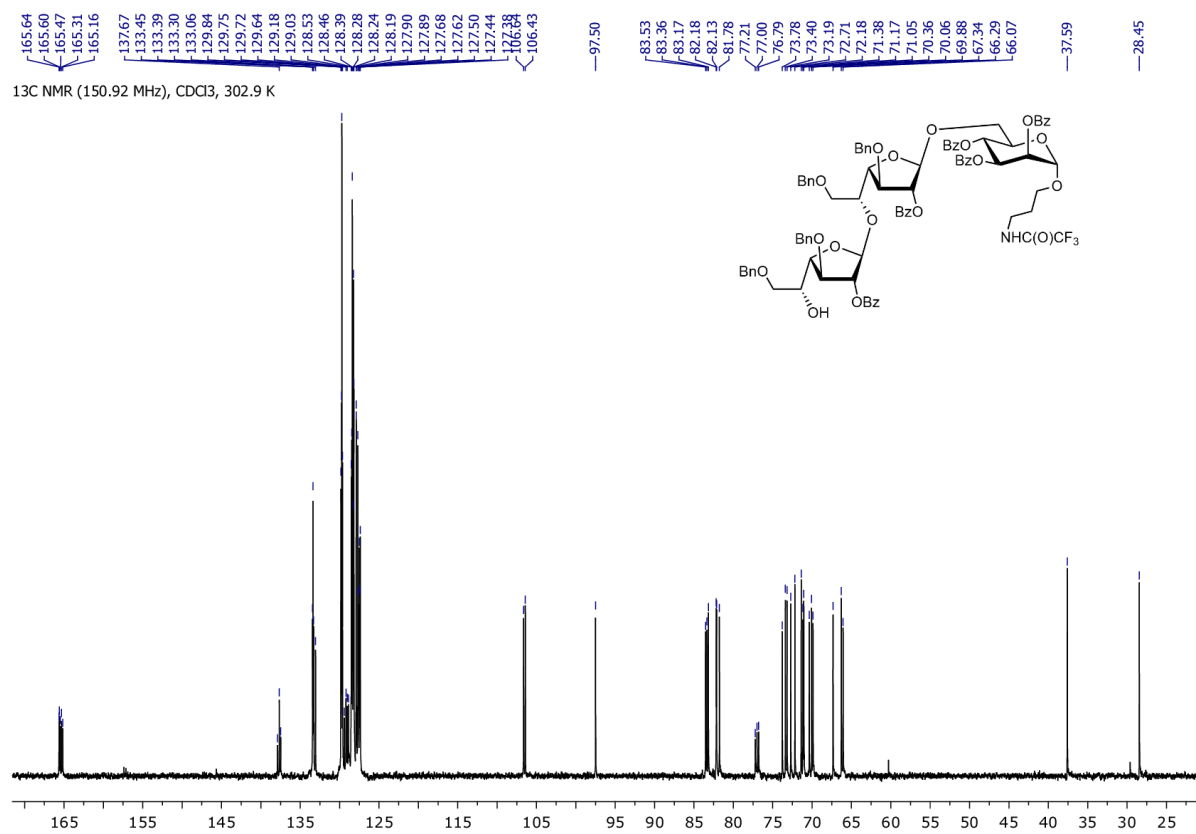

**Acquisition Parameter**

|             |            |                      |          |                  |           |
|-------------|------------|----------------------|----------|------------------|-----------|
| Source Type | ESI        | Ion Polarity         | Positive | Set Nebulizer    | 0.4 Bar   |
| Focus       | Not active |                      |          | Set Dry Heater   | 180 °C    |
| Scan Begin  | 50 m/z     | Set Capillary        | 4500 V   | Set Dry Gas      | 4.0 l/min |
| Scan End    | 3000 m/z   | Set End Plate Offset | -500 V   | Set Divert Valve | Waste     |

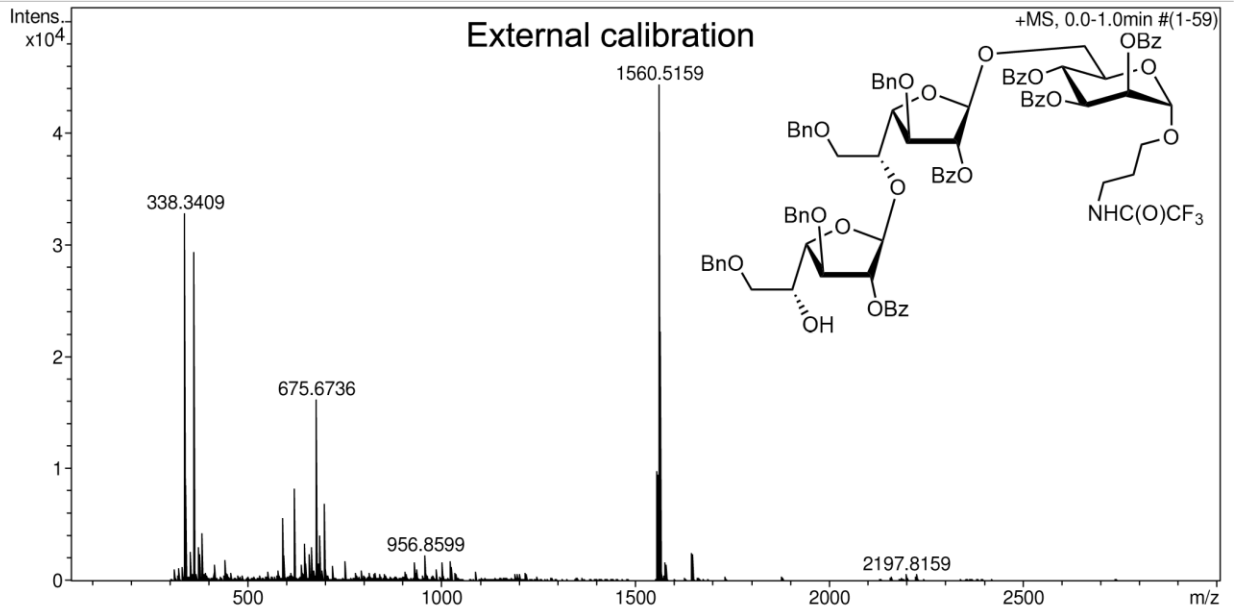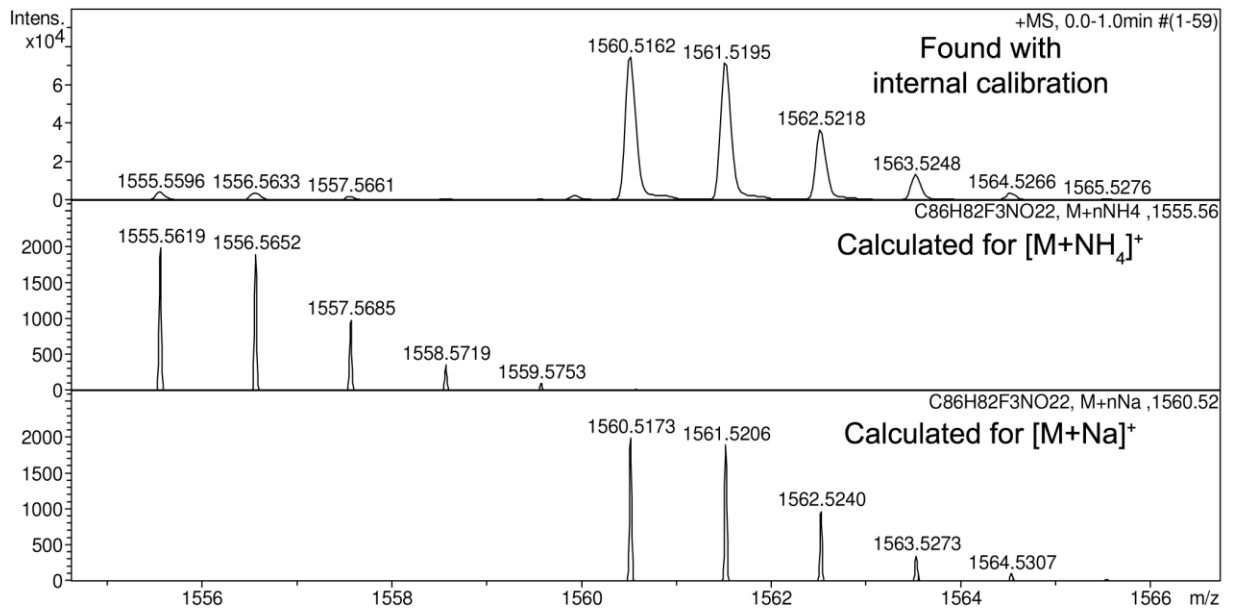

**3-trifluoroacetamidopropyl 2-O-benzoyl-3,6-di-O-benzyl-5-O-chloroacetyl- $\beta$ -D-galactofuranosyl-(1 $\rightarrow$ 5)-2-O-benzoyl-3,6-di-O-benzyl- $\beta$ -D-galactofuranosyl-(1 $\rightarrow$ 5)-2-O-benzoyl-3,6-di-O-benzyl- $\beta$ -D-galactofuranosyl-(1 $\rightarrow$ 5)-2-O-benzoyl-3,6-di-O-benzyl- $\beta$ -D-galactofuranosyl-(1 $\rightarrow$ 6)-2,3,4-tri-O-benzoyl- $\alpha$ -D-mannopyranoside (27)**

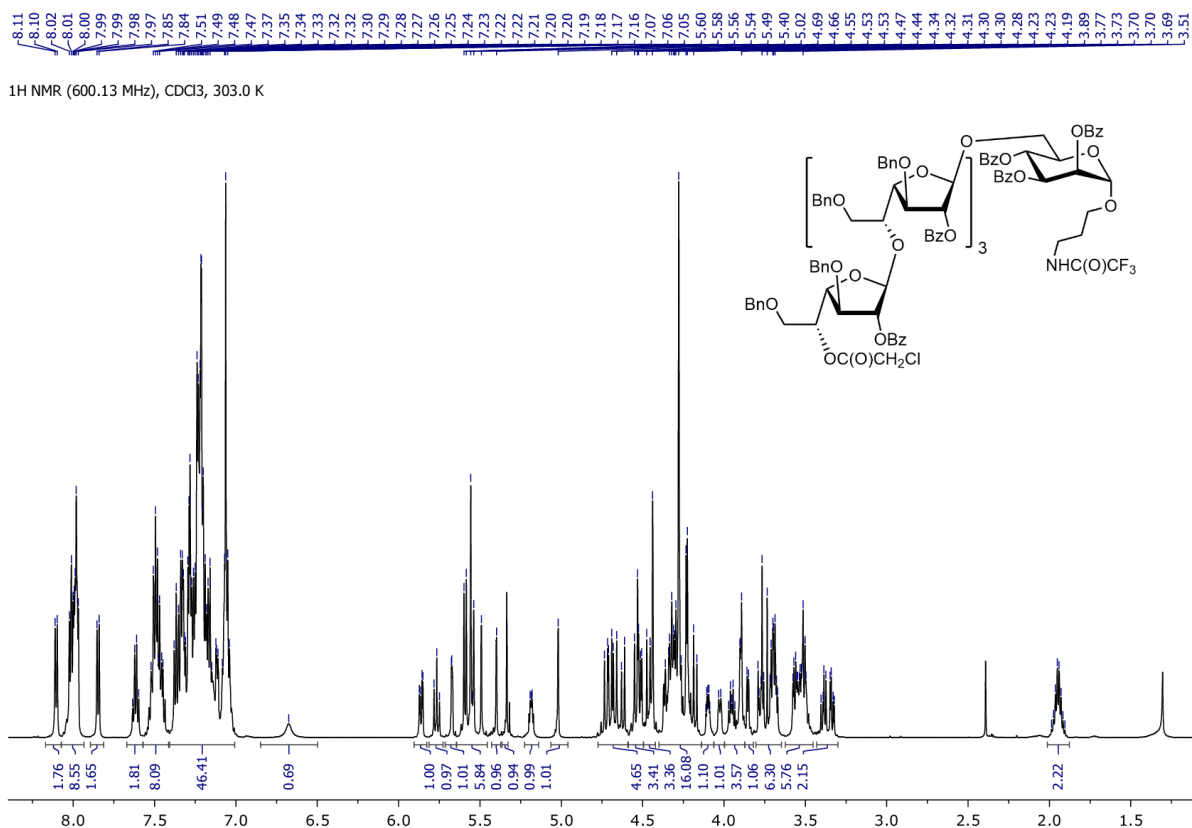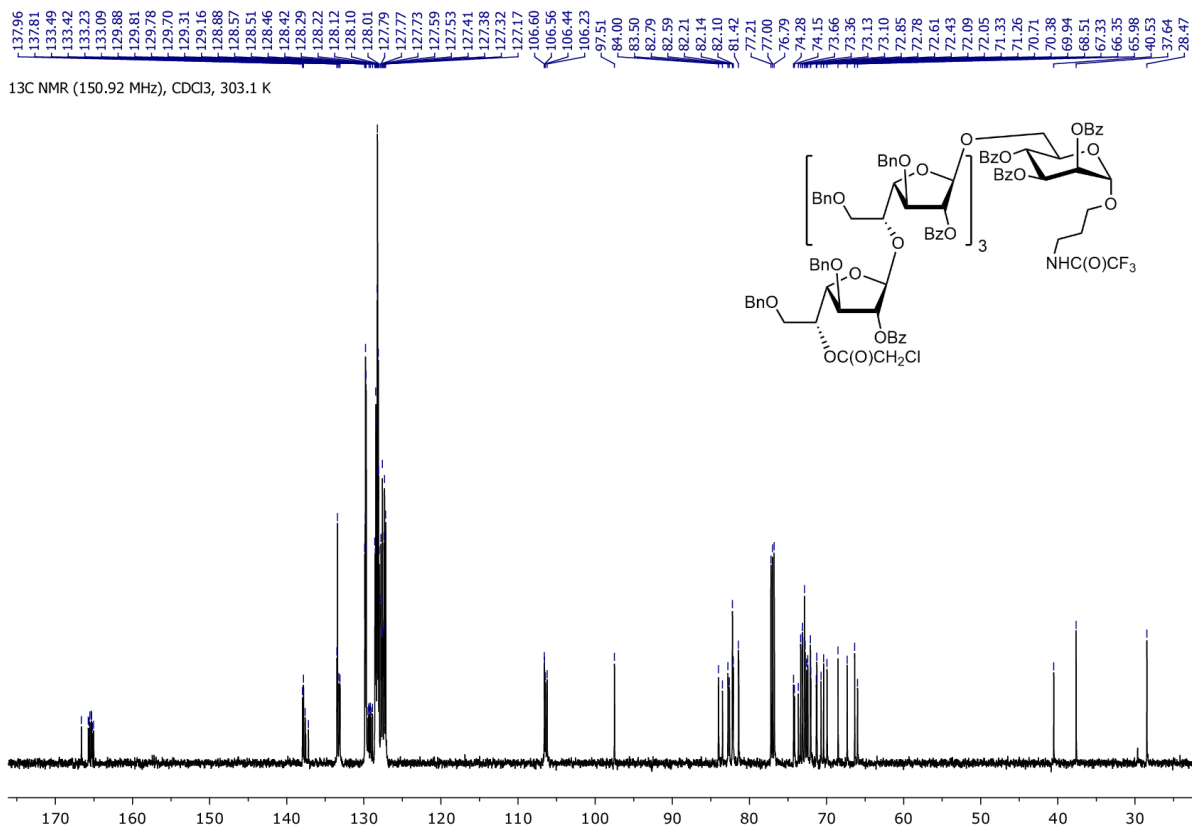

**Acquisition Parameter**

|             |            |                      |          |                  |           |
|-------------|------------|----------------------|----------|------------------|-----------|
| Source Type | ESI        | Ion Polarity         | Positive | Set Nebulizer    | 0.4 Bar   |
| Focus       | Not active |                      |          | Set Dry Heater   | 180 °C    |
| Scan Begin  | 50 m/z     | Set Capillary        | 4500 V   | Set Dry Gas      | 4.0 l/min |
| Scan End    | 3000 m/z   | Set End Plate Offset | -500 V   | Set Divert Valve | Waste     |

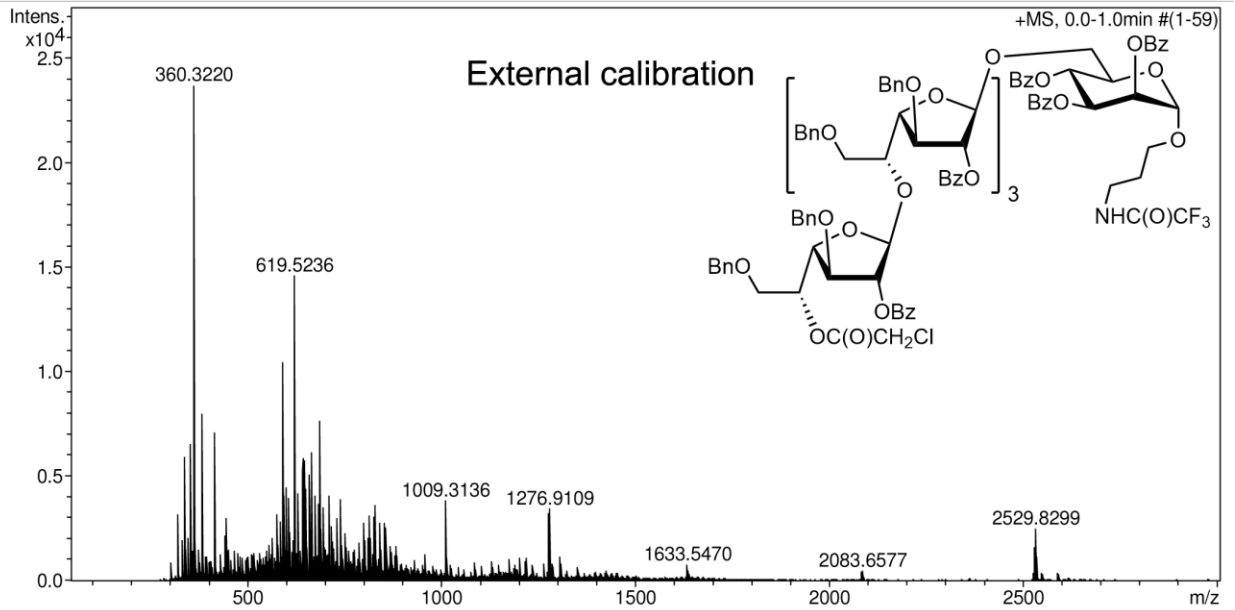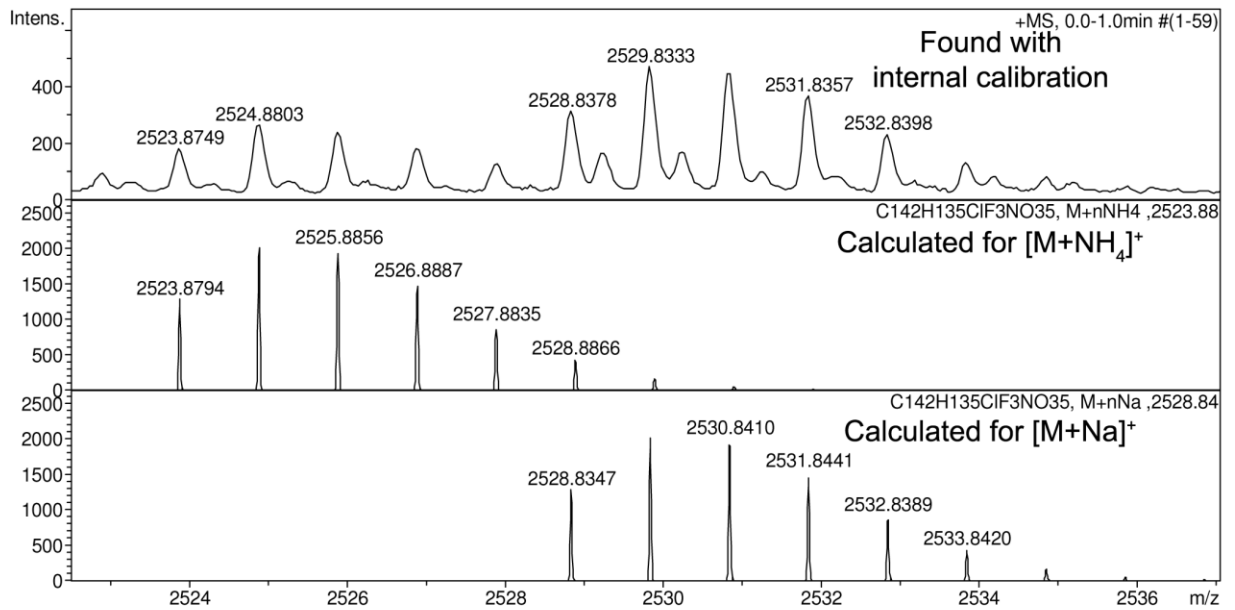



### 3-aminopropyl $\beta$ -D-galactofuranosyl-(1 $\rightarrow$ 5)- $\beta$ -D-galactofuranosyl-(1 $\rightarrow$ 5)- $\beta$ -D-galactofuranosyl-(1 $\rightarrow$ 5)- $\beta$ -D-galactofuranosyl-(1 $\rightarrow$ 6)- $\alpha$ -D-mannopyranoside (1)

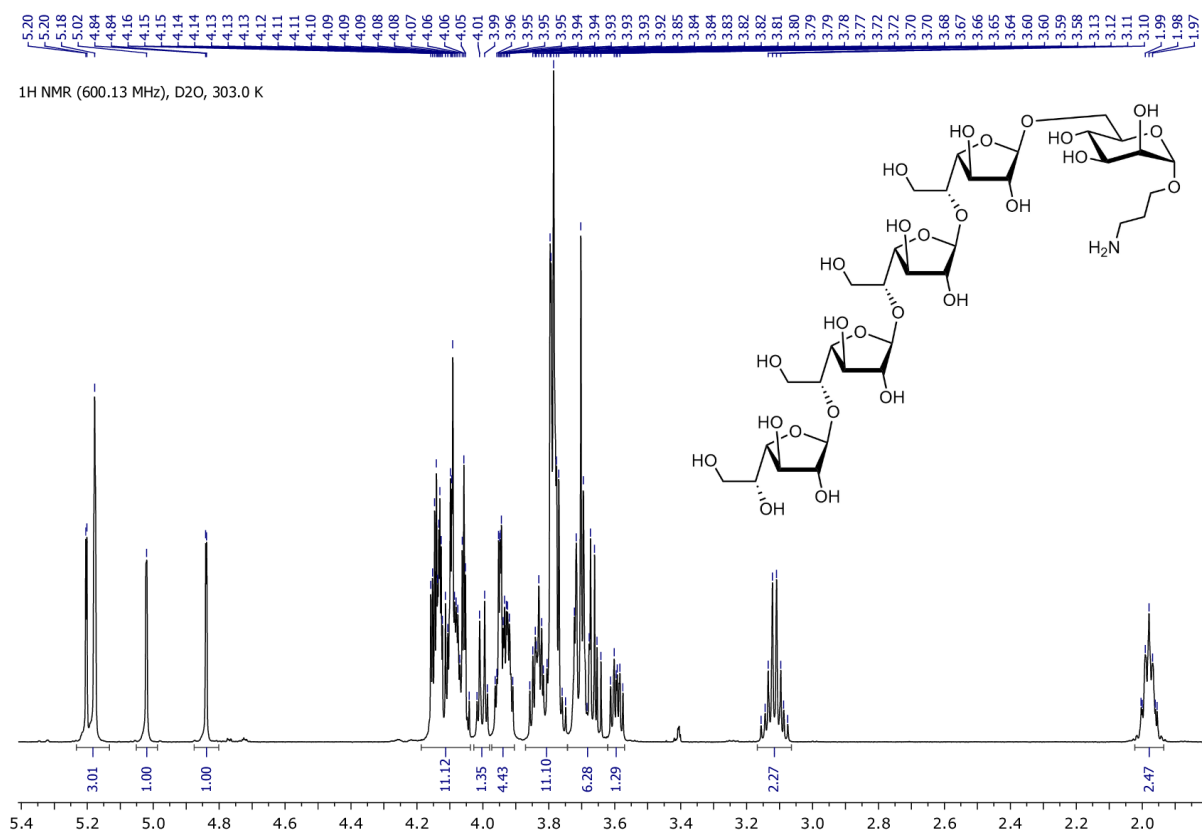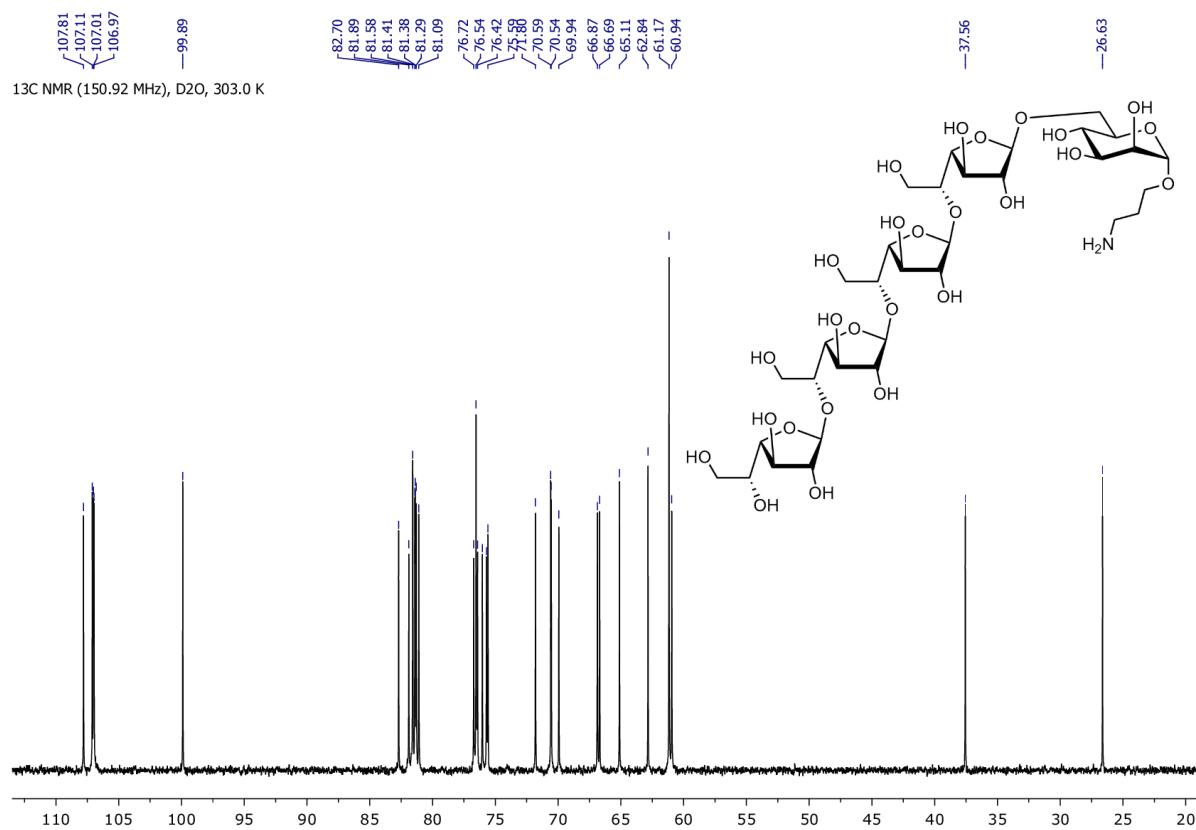

**Acquisition Parameter**

|             |            |                      |          |                  |           |
|-------------|------------|----------------------|----------|------------------|-----------|
| Source Type | ESI        | Ion Polarity         | Positive | Set Nebulizer    | 0.4 Bar   |
| Focus       | Not active |                      |          | Set Dry Heater   | 180 °C    |
| Scan Begin  | 50 m/z     | Set Capillary        | 4500 V   | Set Dry Gas      | 4.0 l/min |
| Scan End    | 3000 m/z   | Set End Plate Offset | -500 V   | Set Divert Valve | Waste     |

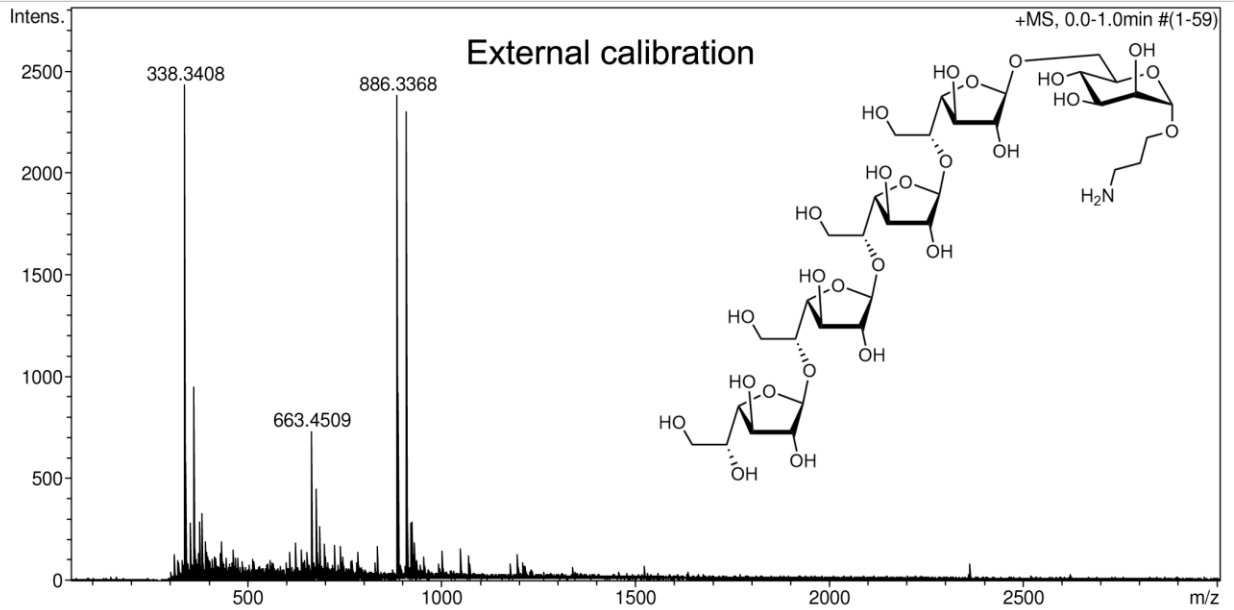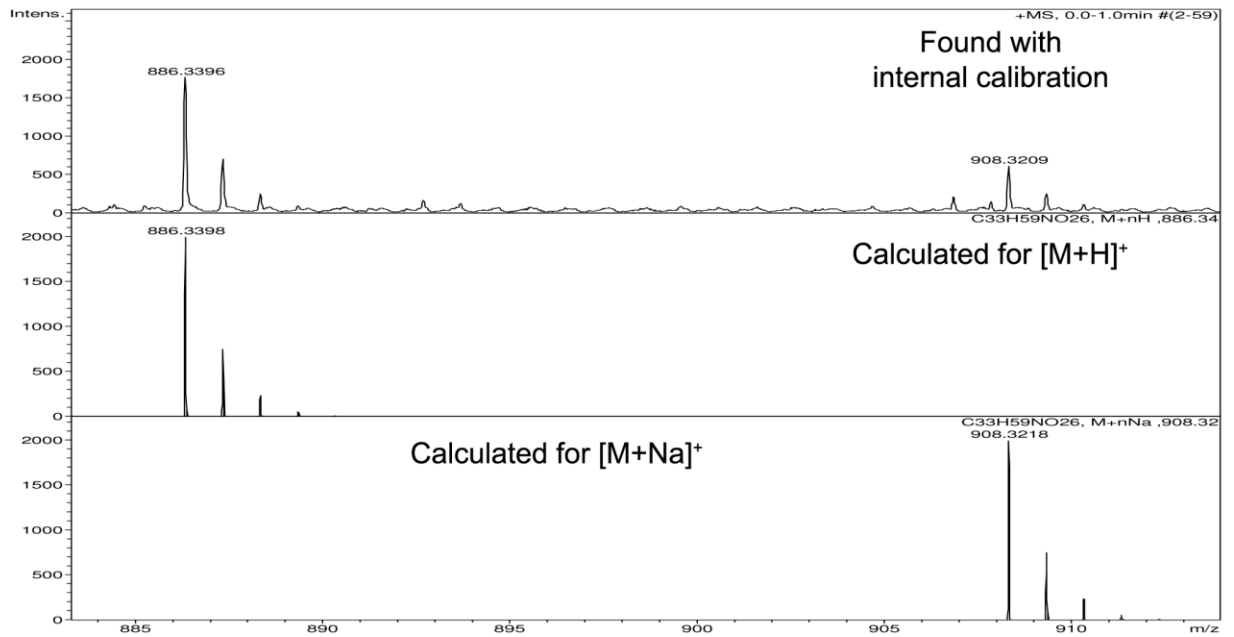

**3-trifluoroacetamidopropyl 2-O-benzoyl-3,6-di-O-benzyl-5-O-chloroacetyl- $\beta$ -D-galactofuranosyl-(1 $\rightarrow$ 5)-2-O-benzoyl-3,6-di-O-benzyl- $\beta$ -D-galactofuranosyl-(1 $\rightarrow$ 3)-2-O-benzoyl-4,6-di-O-benzyl- $\alpha$ -D-mannopyranoside (28)**

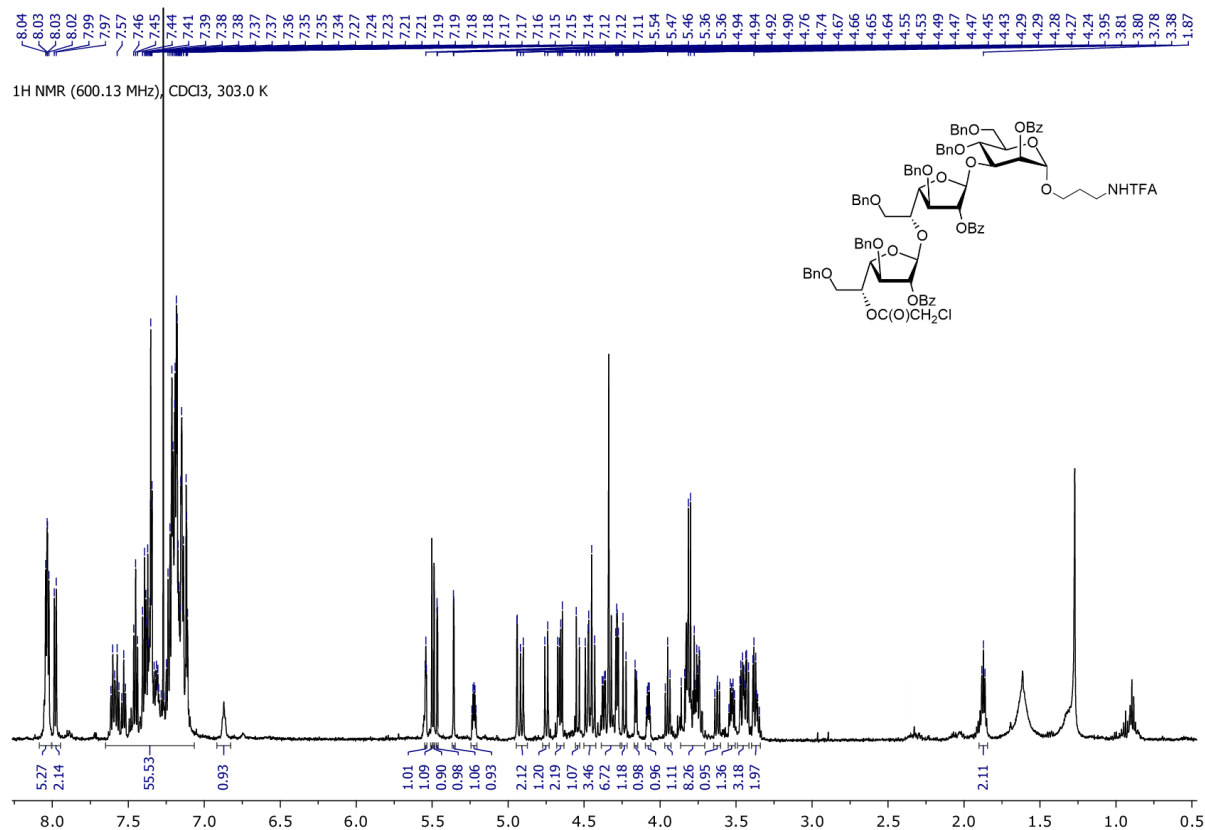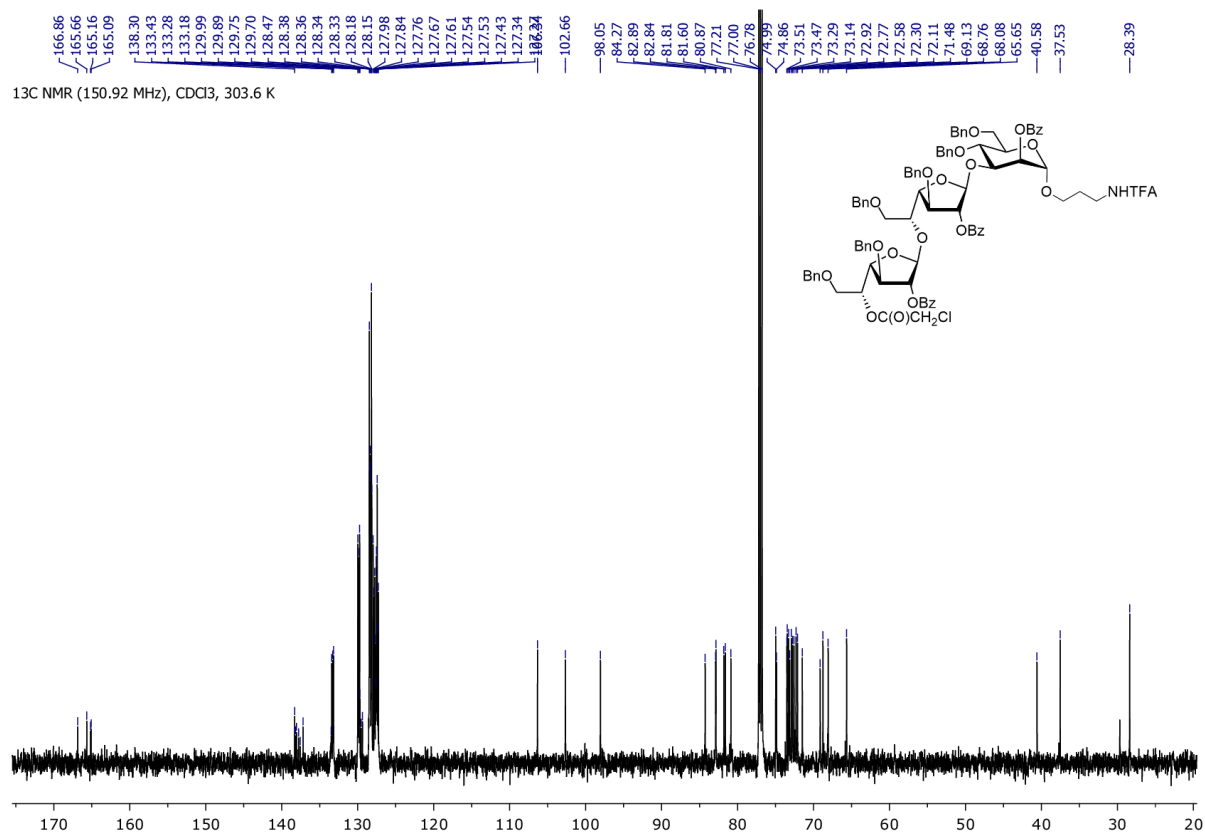

**Acquisition Parameter**

|             |            |                      |          |                  |           |
|-------------|------------|----------------------|----------|------------------|-----------|
| Source Type | ESI        | Ion Polarity         | Positive | Set Nebulizer    | 0.4 Bar   |
| Focus       | Not active |                      |          | Set Dry Heater   | 180 °C    |
| Scan Begin  | 50 m/z     | Set Capillary        | 4500 V   | Set Dry Gas      | 4.0 l/min |
| Scan End    | 3000 m/z   | Set End Plate Offset | -500 V   | Set Divert Valve | Waste     |

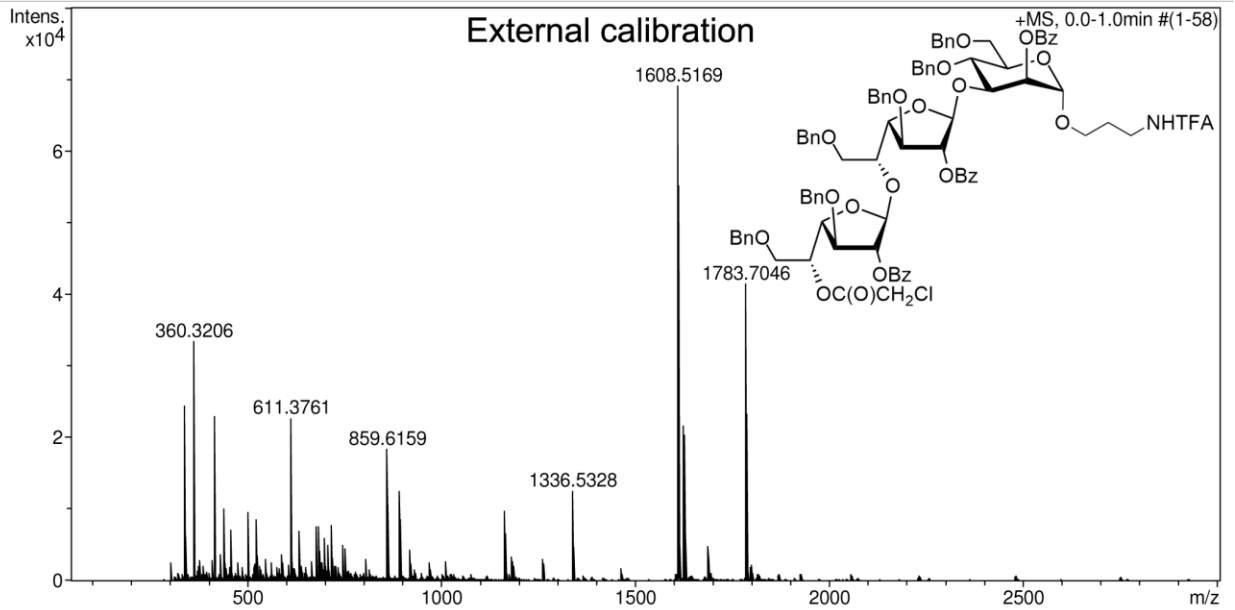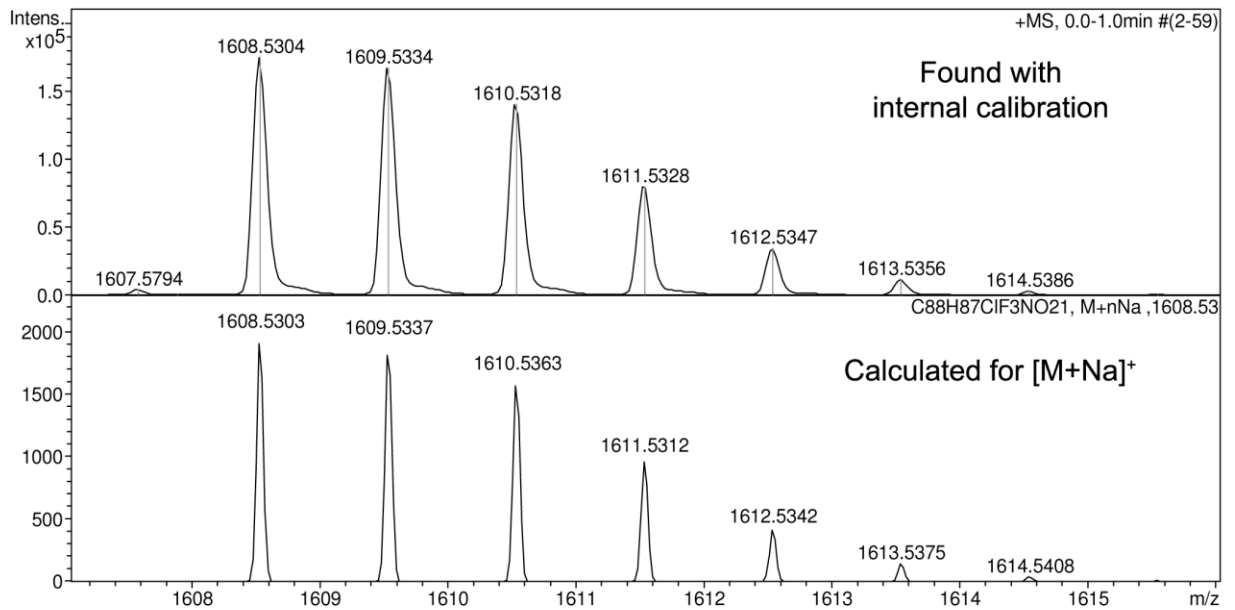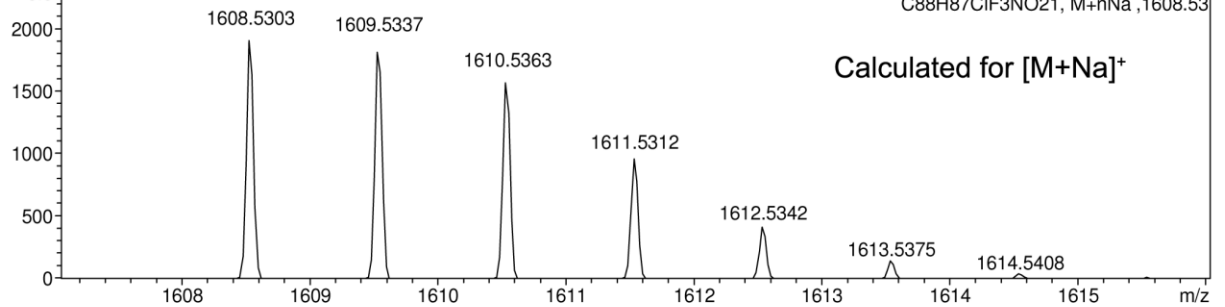

**3-trifluoroacetamidopropyl 2-O-benzoyl-3,6-di-O-benzyl-β-D-galactofuranosyl-(1→5)-2-O-benzoyl-3,6-di-O-benzyl-β-D-galactofuranosyl-(1→3)-2-O-benzoyl-4,6-di-O-benzyl-α-D-mannopyranoside (29)**

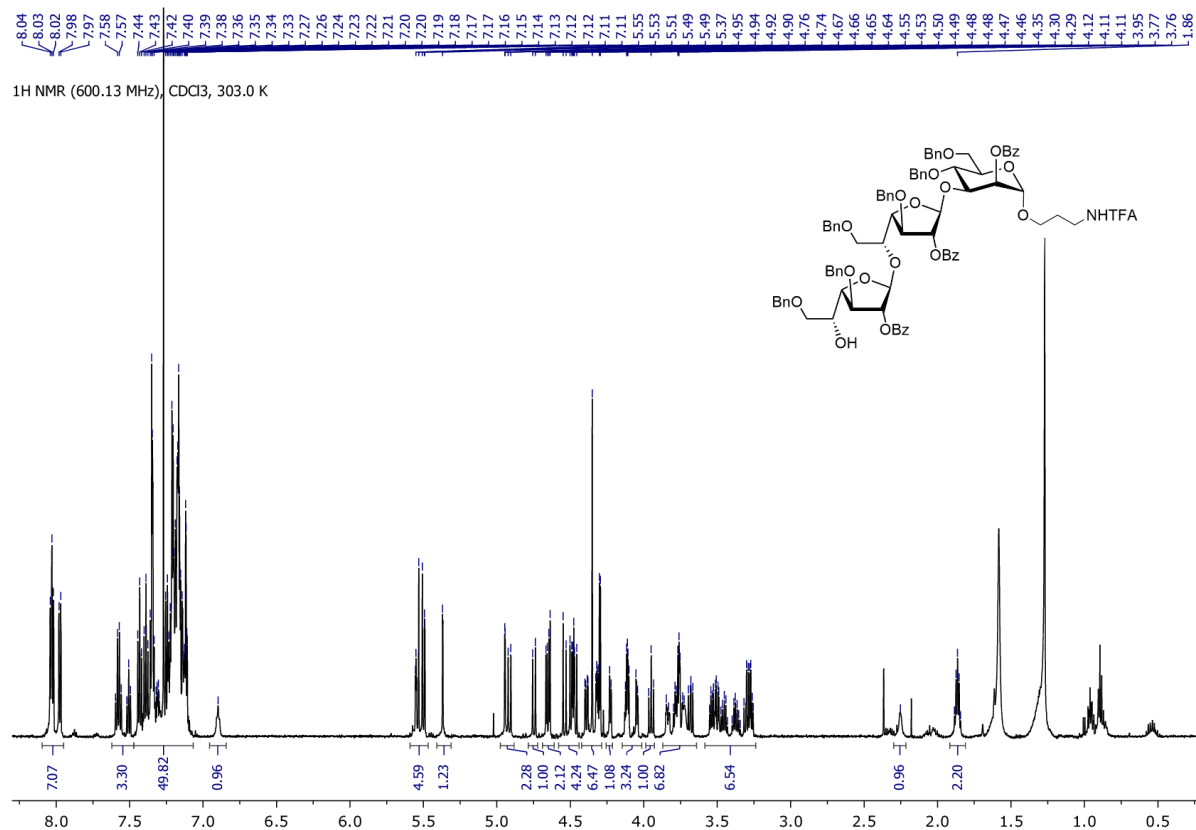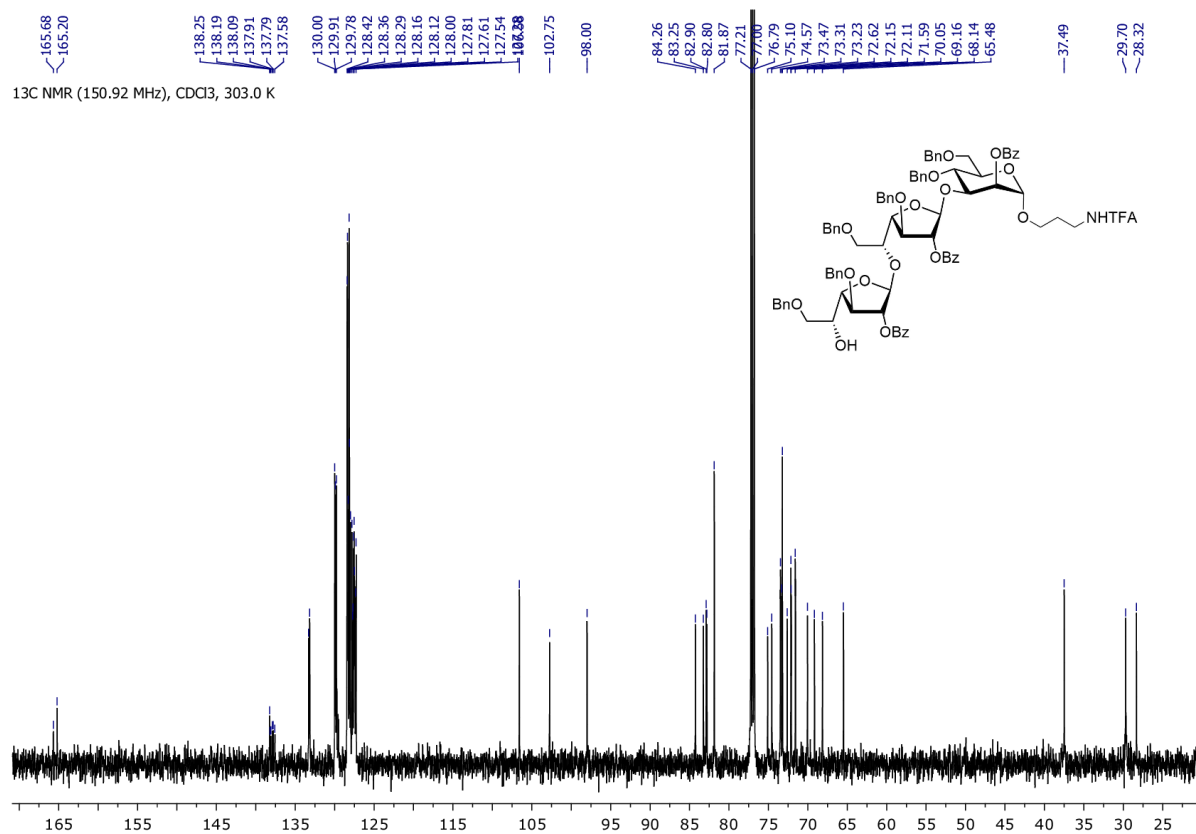

**Acquisition Parameter**

|             |            |                      |          |                  |           |
|-------------|------------|----------------------|----------|------------------|-----------|
| Source Type | ESI        | Ion Polarity         | Positive | Set Nebulizer    | 0.4 Bar   |
| Focus       | Not active |                      |          | Set Dry Heater   | 180 °C    |
| Scan Begin  | 50 m/z     | Set Capillary        | 4500 V   | Set Dry Gas      | 4.0 l/min |
| Scan End    | 3000 m/z   | Set End Plate Offset | -500 V   | Set Divert Valve | Waste     |

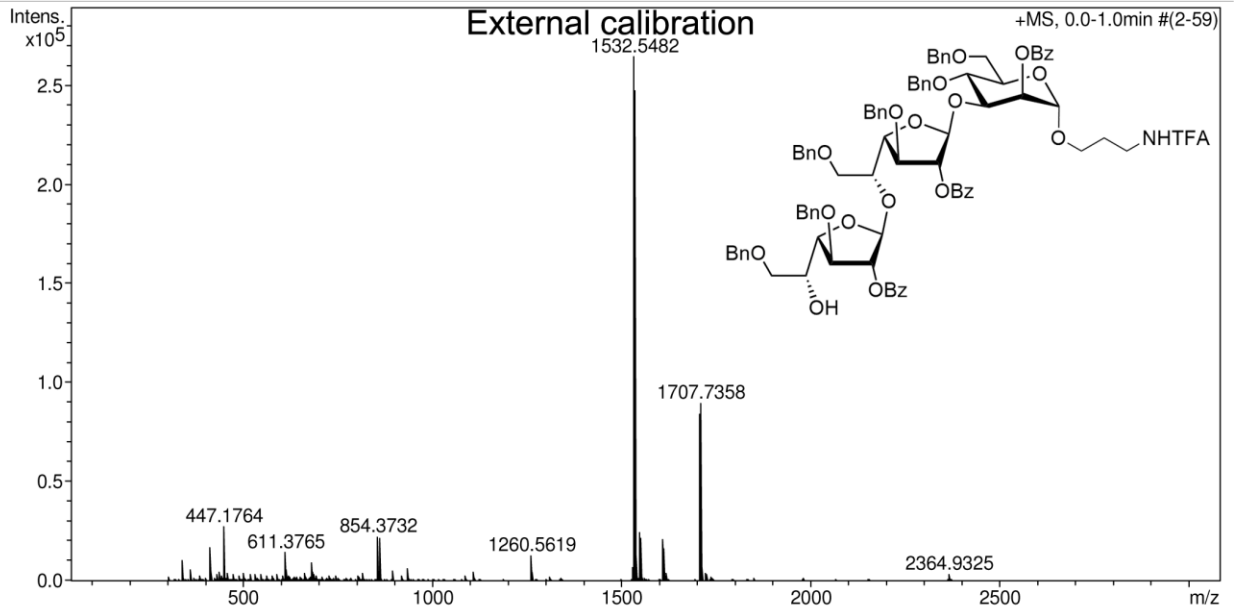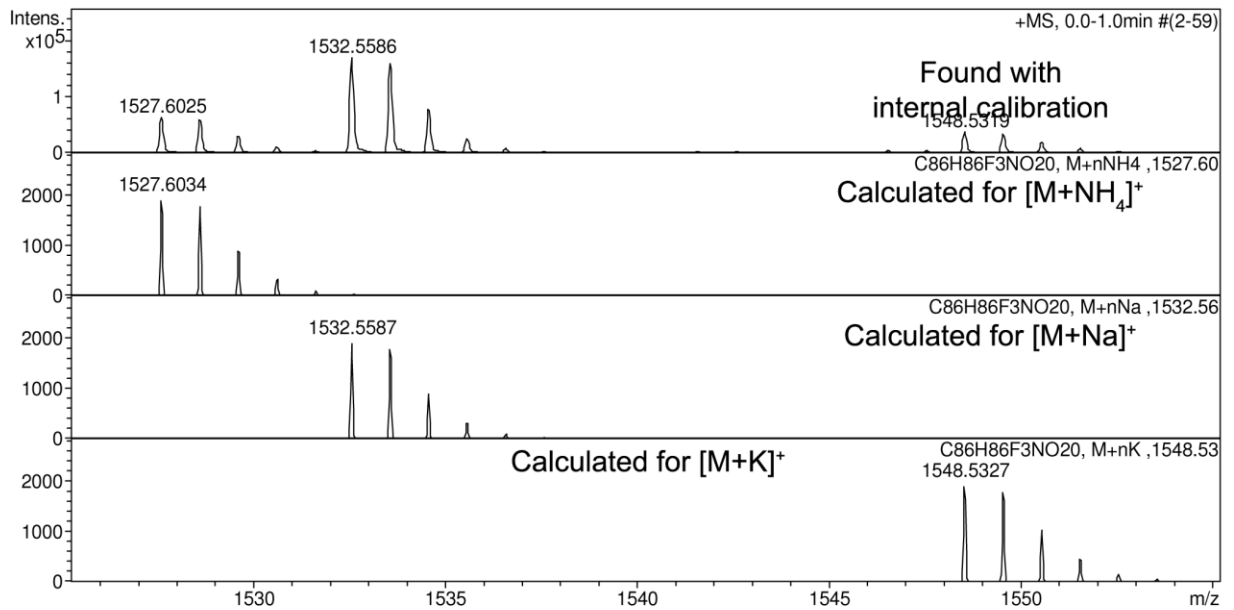

**3-trifluoroacetamidopropyl 2,3,5,6-tetra-O-benzoyl-β-D-galactofuranosyl-(1→5)-2-O-benzoyl-3,6-di-O-benzyl-β-D-galactofuranosyl-(1→5)-2-O-benzoyl-3,6-di-O-benzyl-β-D-galactofuranosyl-(1→5)-2-O-benzoyl-3,6-di-O-benzyl-β-D-galactofuranosyl-(1→3)-2-O-benzoyl-4,6-di-O-benzyl-α-D-mannopyranoside (30)**

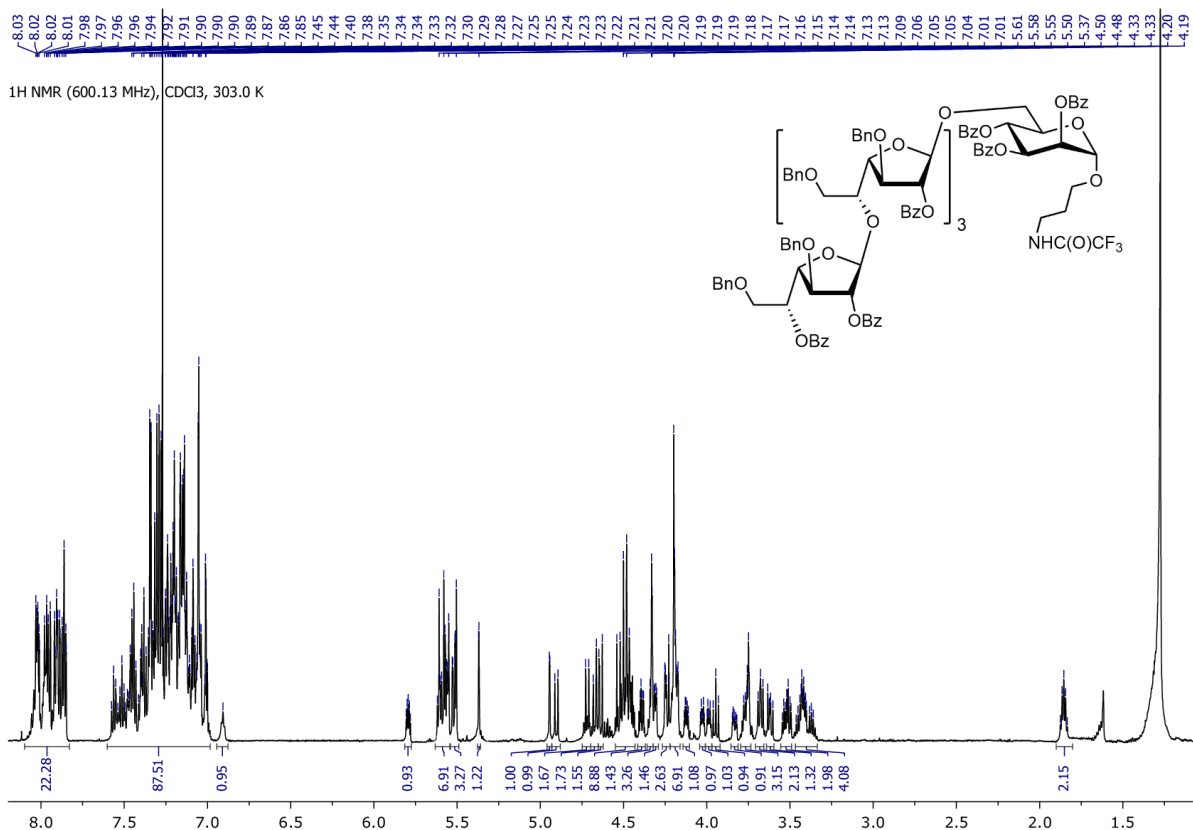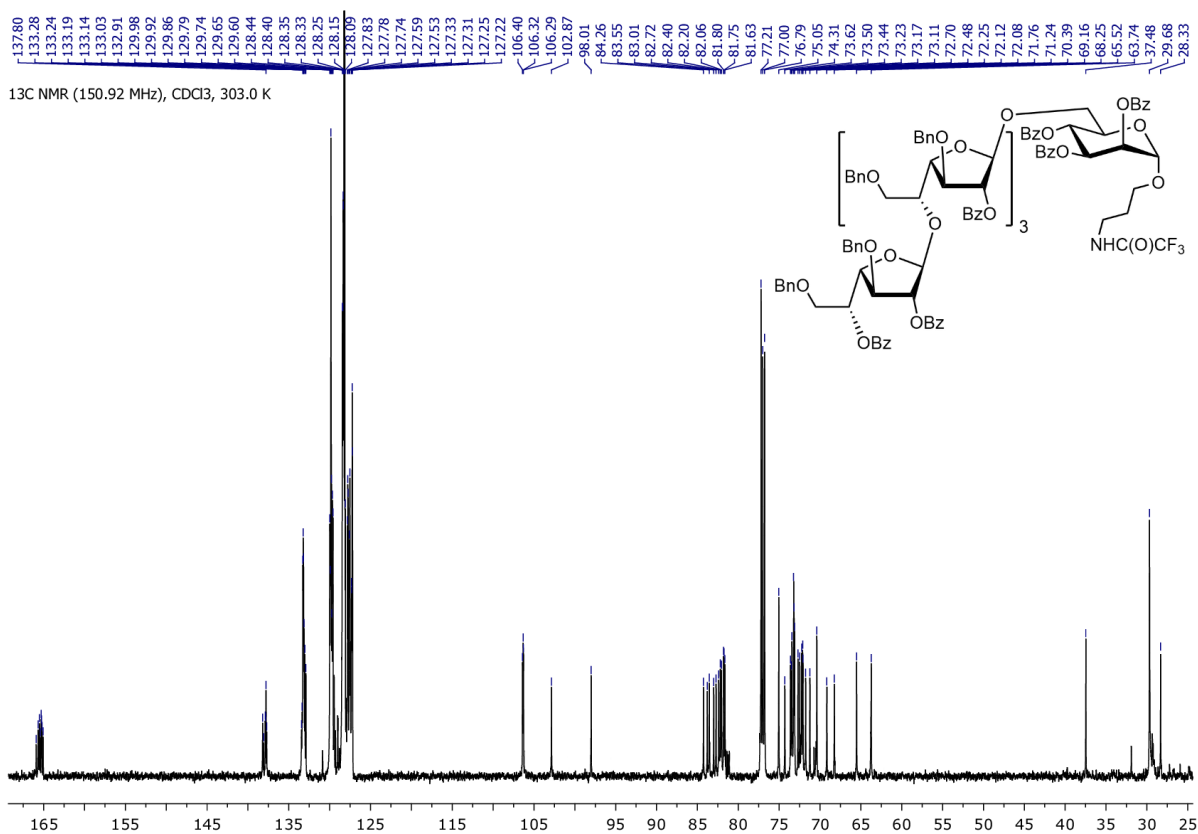

**Acquisition Parameter**

|             |            |                      |          |                  |           |
|-------------|------------|----------------------|----------|------------------|-----------|
| Source Type | ESI        | Ion Polarity         | Positive | Set Nebulizer    | 0.4 Bar   |
| Focus       | Not active |                      |          | Set Dry Heater   | 180 °C    |
| Scan Begin  | 50 m/z     | Set Capillary        | 4500 V   | Set Dry Gas      | 4.0 l/min |
| Scan End    | 3000 m/z   | Set End Plate Offset | -500 V   | Set Divert Valve | Waste     |

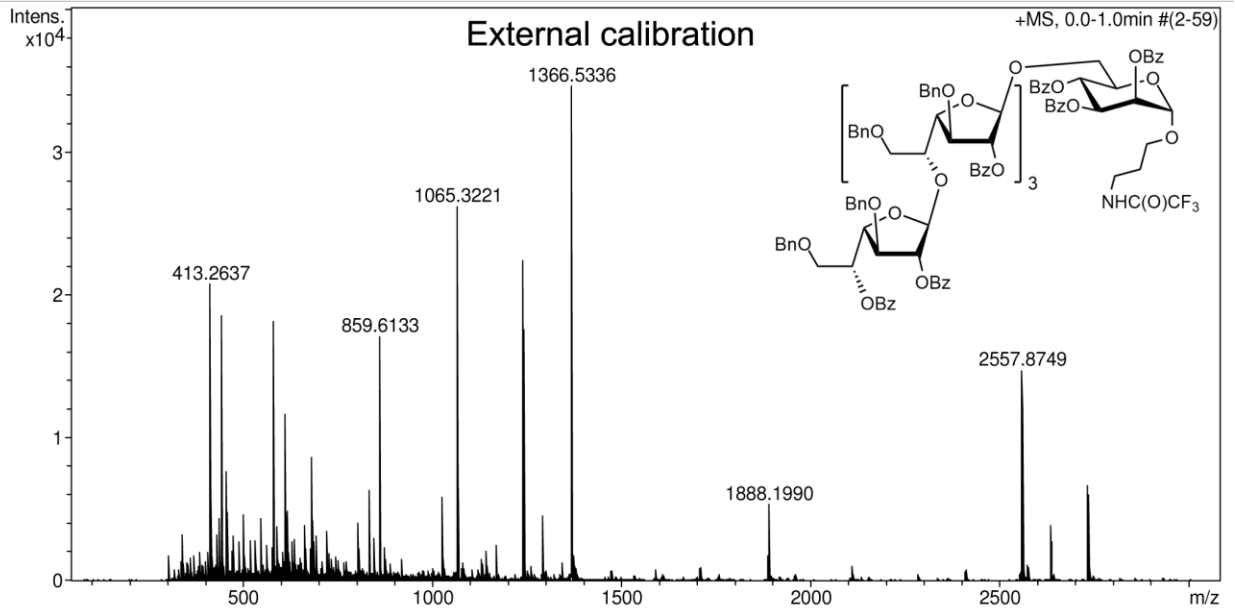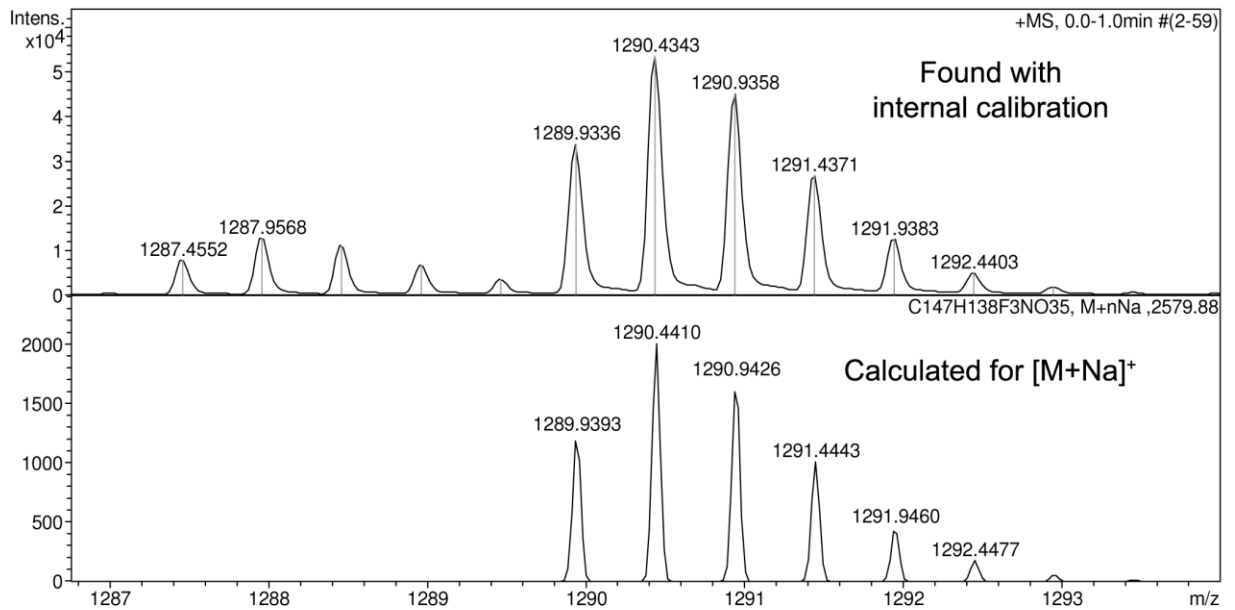



**3-aminopropyl  $\beta$ -D-galactofuranosyl-(1 $\rightarrow$ 5)- $\beta$ -D-galactofuranosyl-(1 $\rightarrow$ 5)- $\beta$ -D-galactofuranosyl-(1 $\rightarrow$ 5)- $\beta$ -D-galactofuranosyl-(1 $\rightarrow$ 3)- $\alpha$ -D-mannopyranoside (2)**

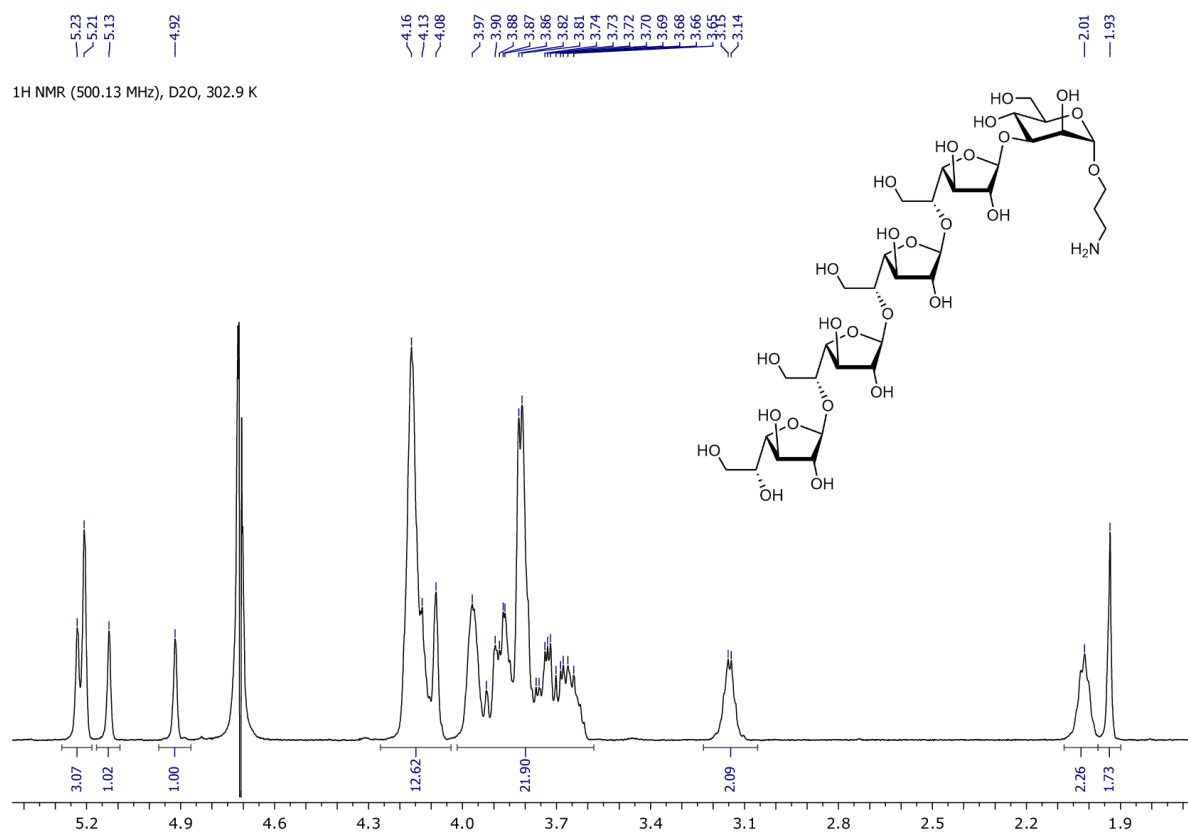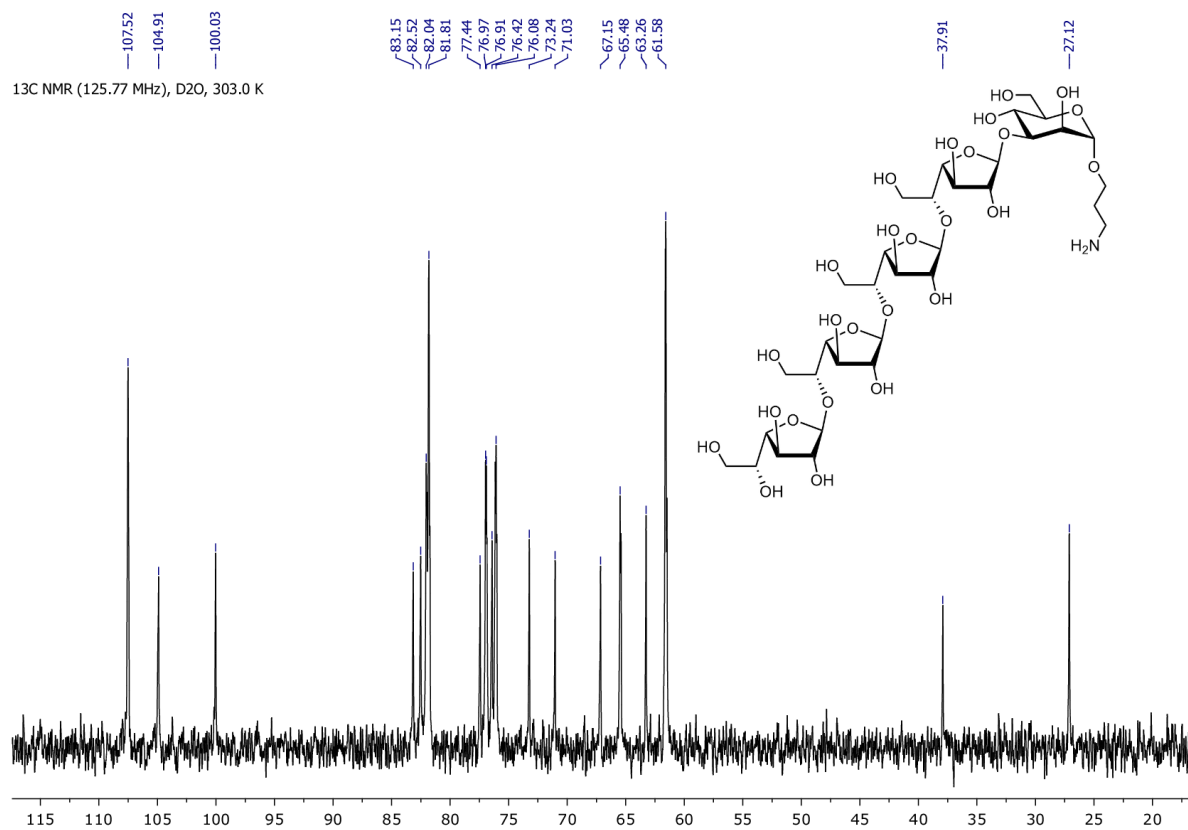

**Acquisition Parameter**

|             |          |                       |            |                  |           |
|-------------|----------|-----------------------|------------|------------------|-----------|
| Source Type | ESI      | Ion Polarity          | Positive   | Set Nebulizer    | 0.4 Bar   |
| Focus       | Active   | Set Capillary         | 4500 V     | Set Dry Heater   | 180 °C    |
| Scan Begin  | 50 m/z   | Set End Plate Offset  | -500 V     | Set Dry Gas      | 4.0 l/min |
| Scan End    | 3000 m/z | Set Collision Cell RF | 1200.0 Vpp | Set Divert Valve | Waste     |

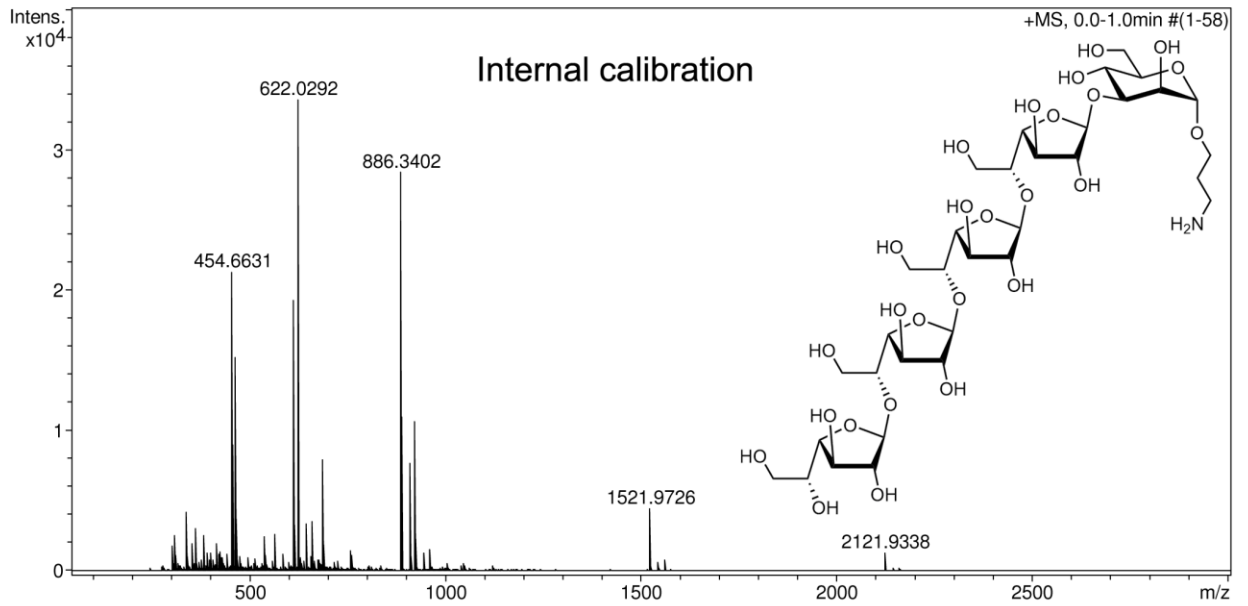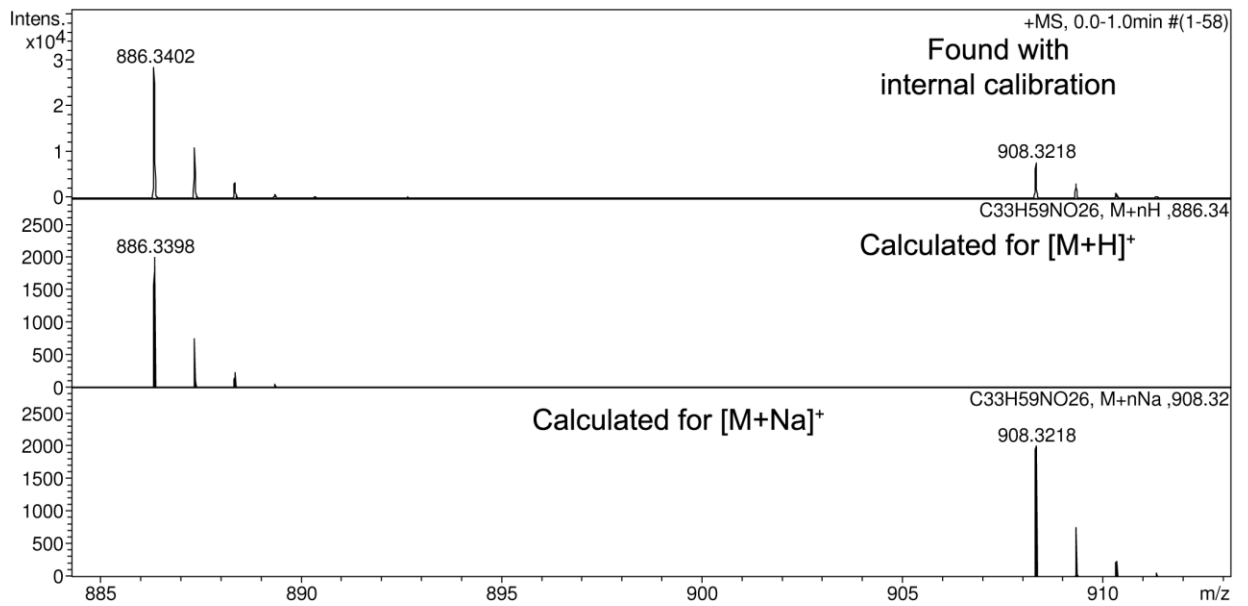

Supplement: c4ob02634a1.pdf [file c4ob02634a1.pdf]
